# Supplementary material
Source: publisher figshare collection journal article supplement (https://tandf.figshare.com/articles/dataset/_/5633755)
Supplement: Supplementary file 1 [file 2]

Fig. S2

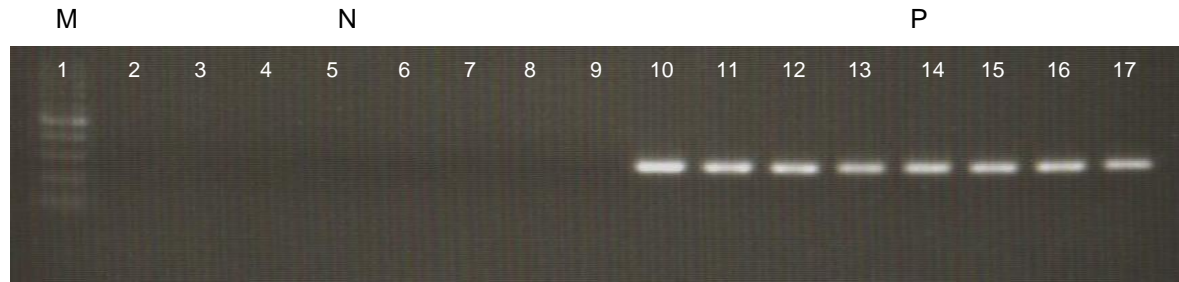

**Figure S2.** Confirmation of the absence of genomic DNA contamination in total RNA. A segment of the ubiquitin gene was amplified by PCR using ubiquitin (SUBI-1) F and ubiquitin (SUBI-1) R primers in positive control lanes from 10-17. Compared with positive control lanes, no amplification of the ubiquitin gene was obtained using the same primers from the negative controls (2-9). **One out of the three biological replicates was selected at random for this experiment.**

Lane 1: Marker  
 Lane 2: W (+) d0  
 Lane 3: N (+) d0  
 Lane 4: W (+) d2  
 Lane 5: N (+) d2  
 Lane 6: W (+) d4  
 Lane 7: N (+) d4  
 Lane 8: W (+) d5  
 Lane 9: N (+) d5

Lane 10: W (+) d0  
 Lane 11: N (+) d0  
 Lane 12: W (+) d2  
 Lane 13: N (+) d2  
 Lane 14: W (+) d4  
 Lane 15: N (+) d4  
 Lane 16: W (+) d5  
 Lane 17: N (+) d5

Lane 2-9 : N (Negative controls) : Water was added instead of a reverse transcriptase enzyme Super Script III RT.

Lane 10-17: P (Positive controls) : The reverse transcriptase enzyme Super Script III RT was used.

W: Williams 82

N: NOD1-3

(+): rhizobium inoculation

d0: 0 day

d2: 2 days

d4: 4 days

d5: 5 days
