# Supplementary material
Source: publisher figshare collection journal article supplement (https://tandf.figshare.com/articles/dataset/_/5633755)
Supplement: Supplementary file 2 [file 2]

Archive with 4 entries (4 files):
- tssp_a_1403842_sm1382.pdf
- tssp_a_1403842_sm9075.pdf
- tssp_a_1403842_sm9074.pdf
- tssp_a_1403842_sm9073.pdf
