# Supplementary material
Source: publisher figshare collection journal article supplement (https://tandf.figshare.com/articles/dataset/_/5633755)
Supplement: Supplementary file 2 [file 2 › tssp_a_1403842_sm1382.pdf]

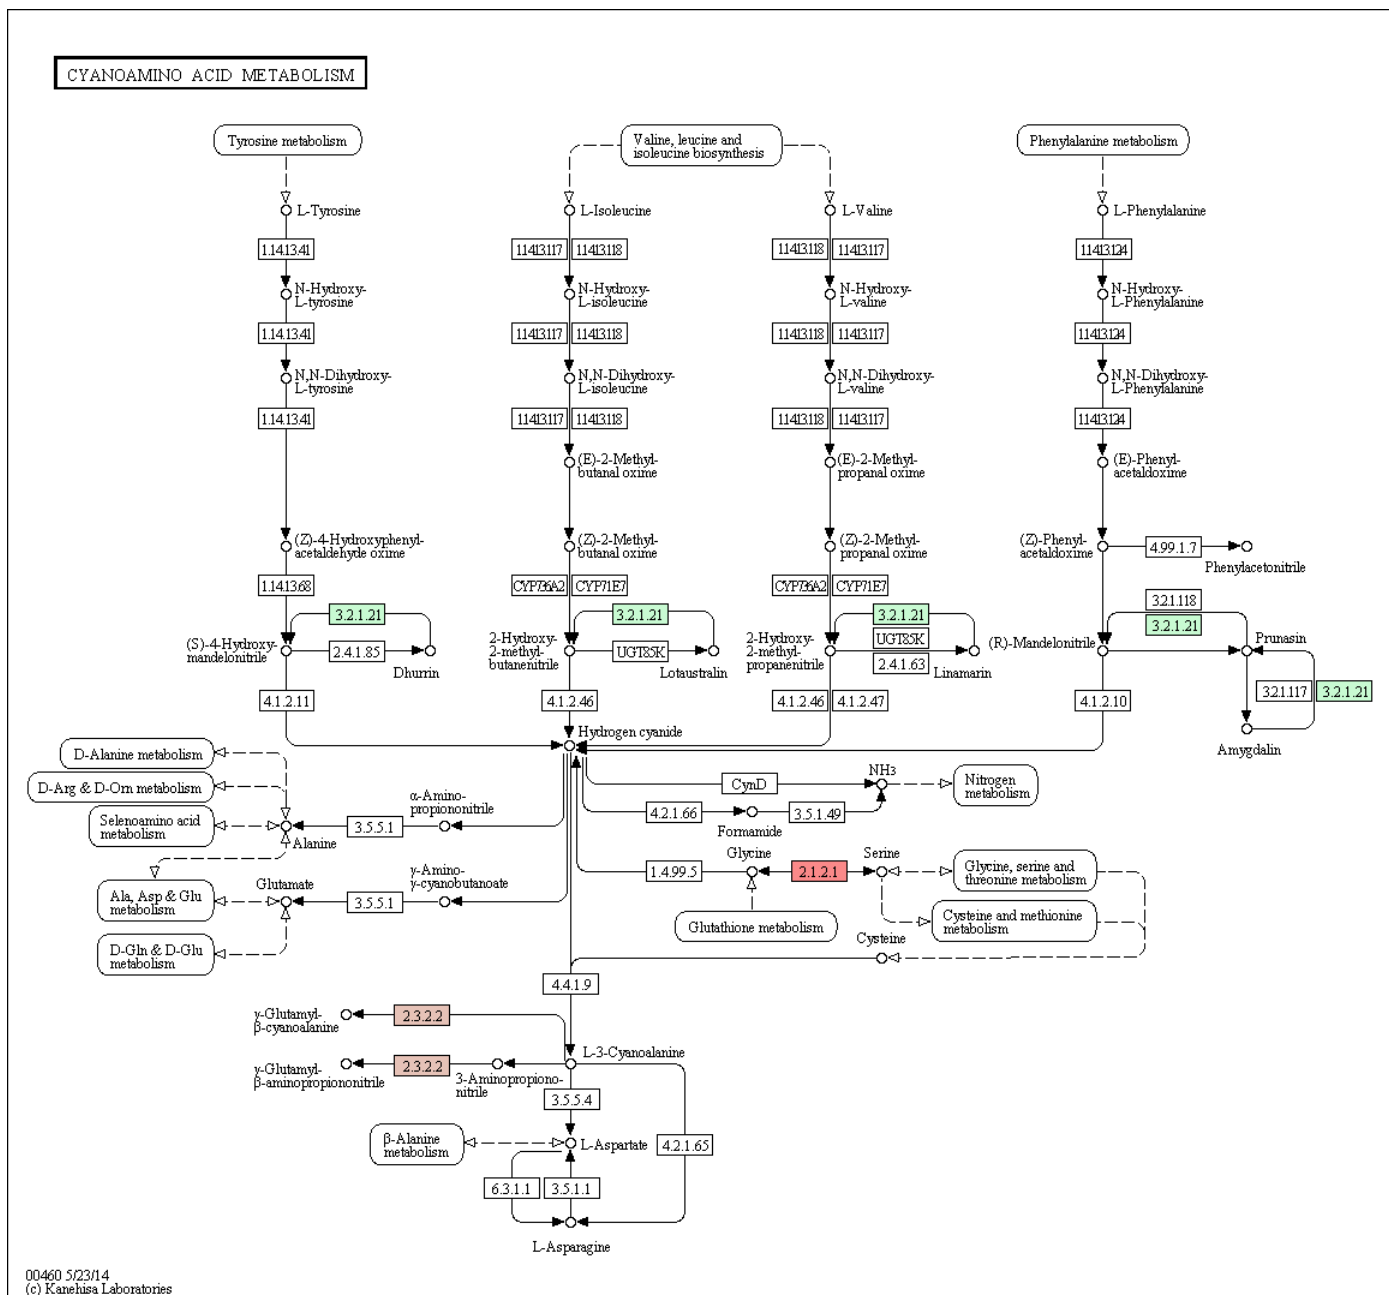

**Image S1-image map00460.** Enzyme codes (EC) in Supplemental Table S4 are highlighted with different colors (one color for each EC) in the KEGG (Kanehisa et al., 2016) map using the Blast2GO online service (<https://www.blast2go.com>).

00140 12/18/13  
(c) Kanehisa Laboratories



Ima. S1-image map00944

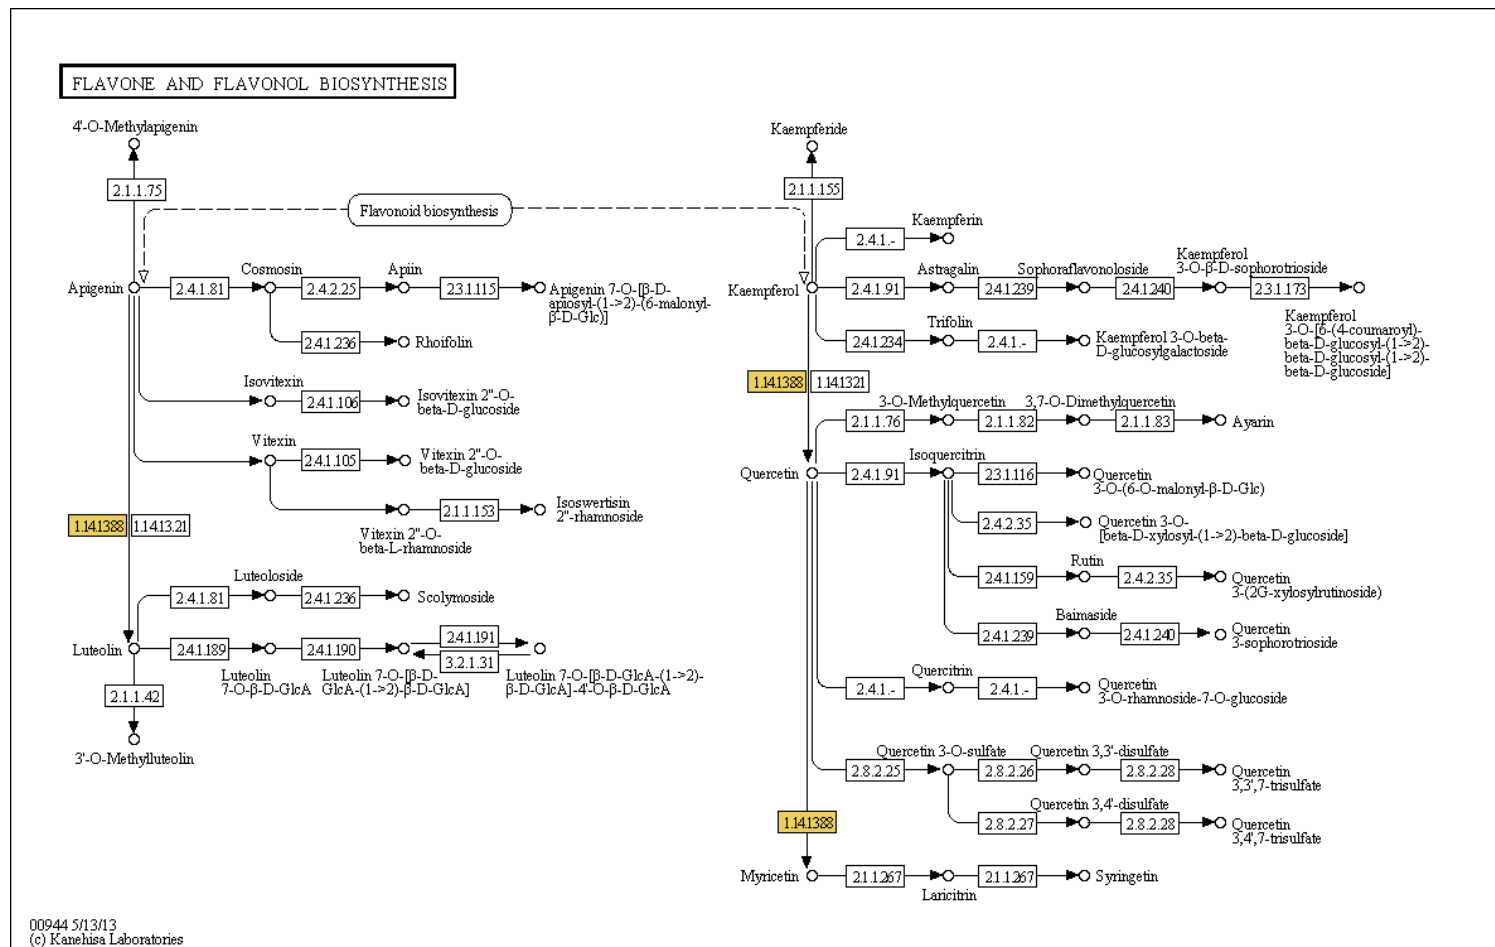

**Image S1-image map00944.** Enzyme codes (EC) in Supplemental Table S4 are highlighted with different colors (one color for each EC) in the KEGG (Kanehisa et al., 2016) map using the Blast2GO online service (<https://www.blast2go.com>).

Ima. S1-image map00943

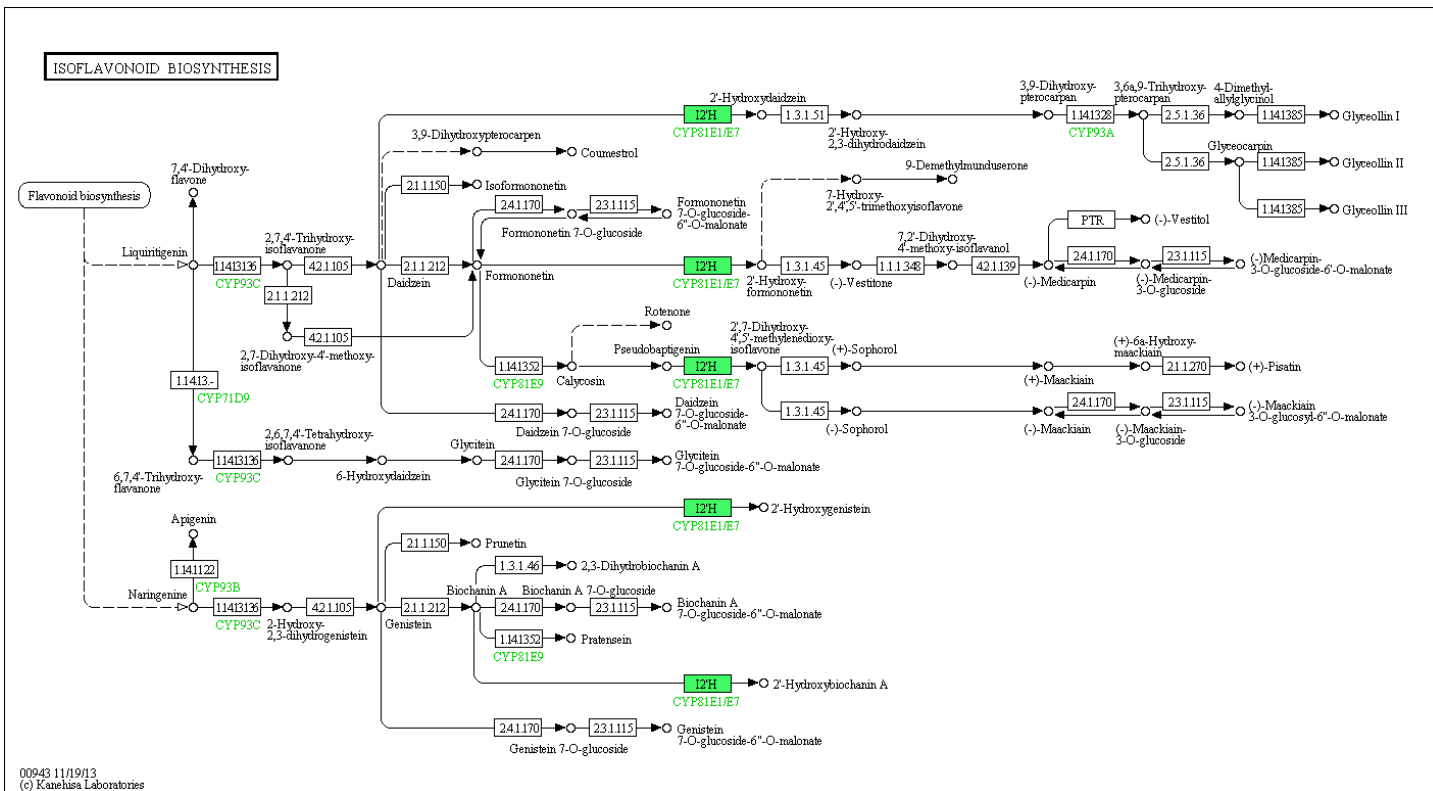

**Image S1-image map00943.** Enzyme codes (EC) in Supplemental Table S4 are highlighted with different colors (one color for each EC) in the KEGG (Kanehisa et al., 2016) map using the Blast2GO online service (<https://www.blast2go.com>).

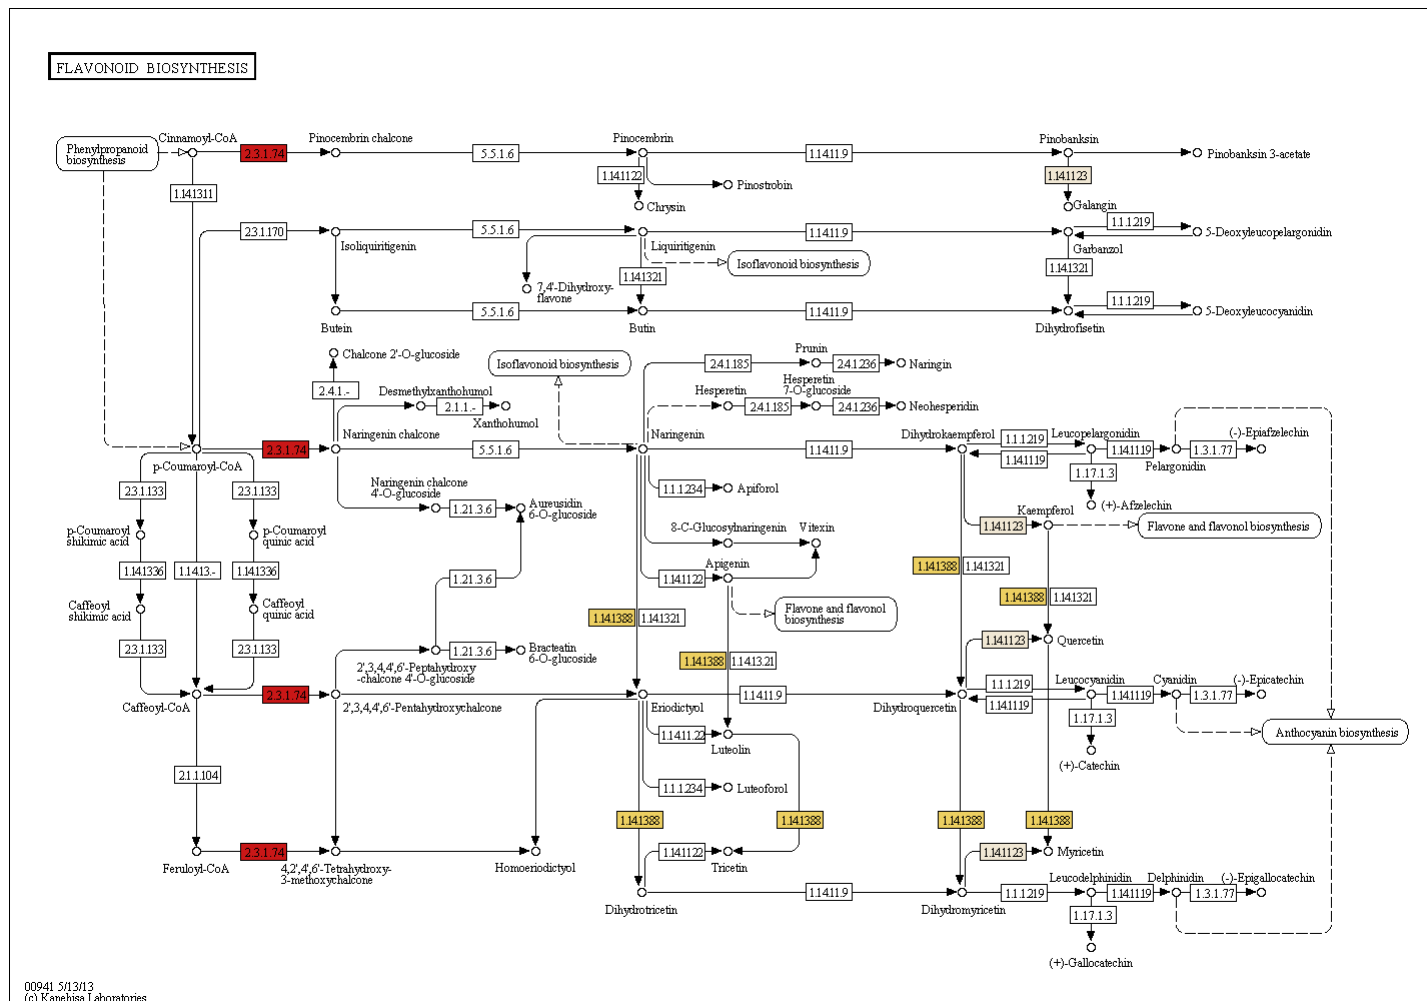

**Image S1-image map00941.** Enzyme codes (EC) in Supplemental Table S4 are highlighted with different colors (one color for each EC) in the KEGG (Kanehisa et al., 2016) map using the Blast2GO online service (<https://www.blast2go.com>).

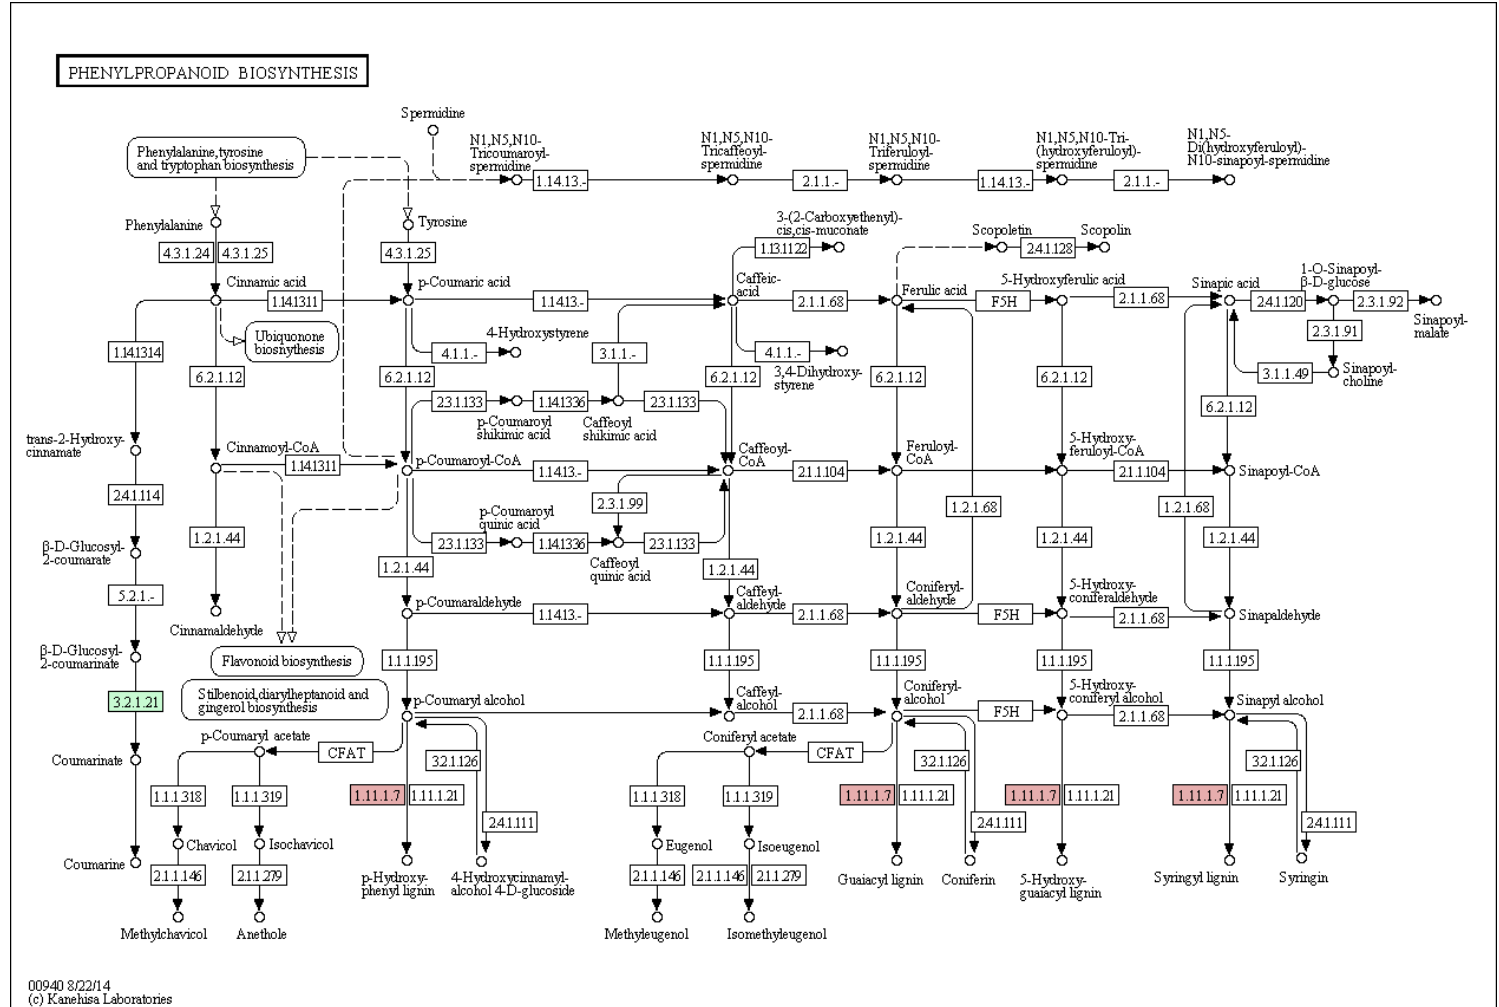

**Image S1-image map00940.** Enzyme codes (EC) in Supplemental Table S4 are highlighted with different colors (one color for each EC) in the KEGG (Kanehisa et al., 2016) map using the Blast2GO online service (<https://www.blast2go.com>).

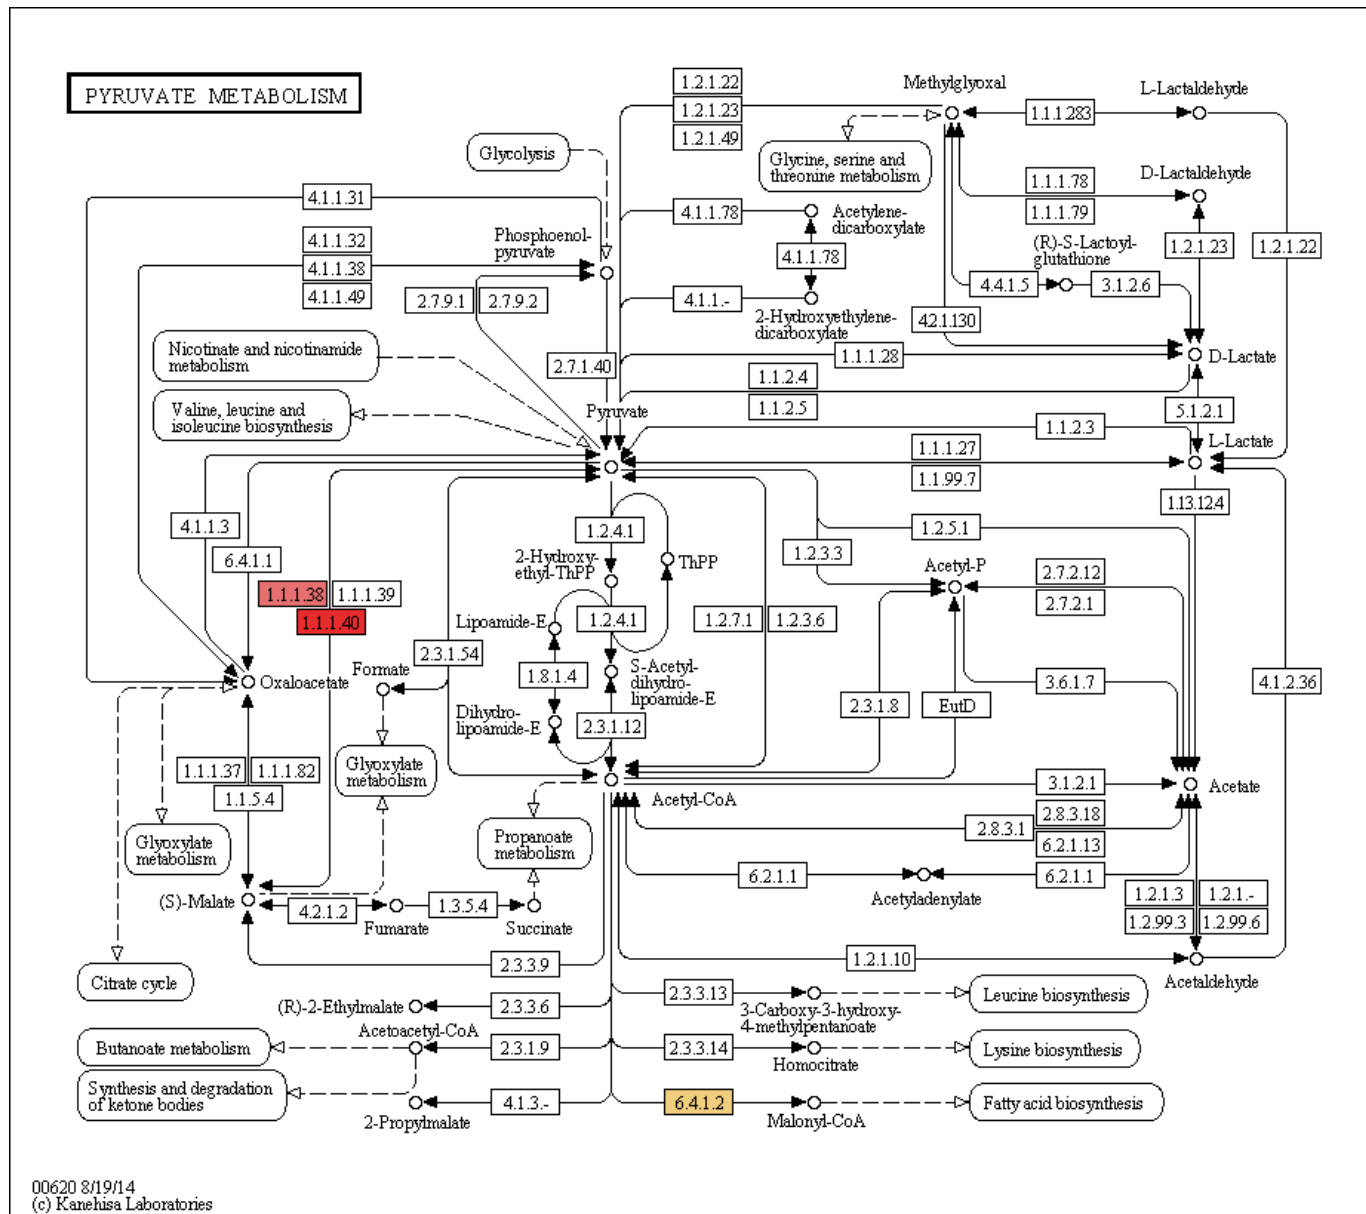

**Image S1-image map00620.** Enzyme codes (EC) in Supplemental Table S4 are highlighted with different colors (one color for each EC) in the KEGG (Kanehisa et al., 2016) map using the Blast2GO online service (<https://www.blast2go.com>).

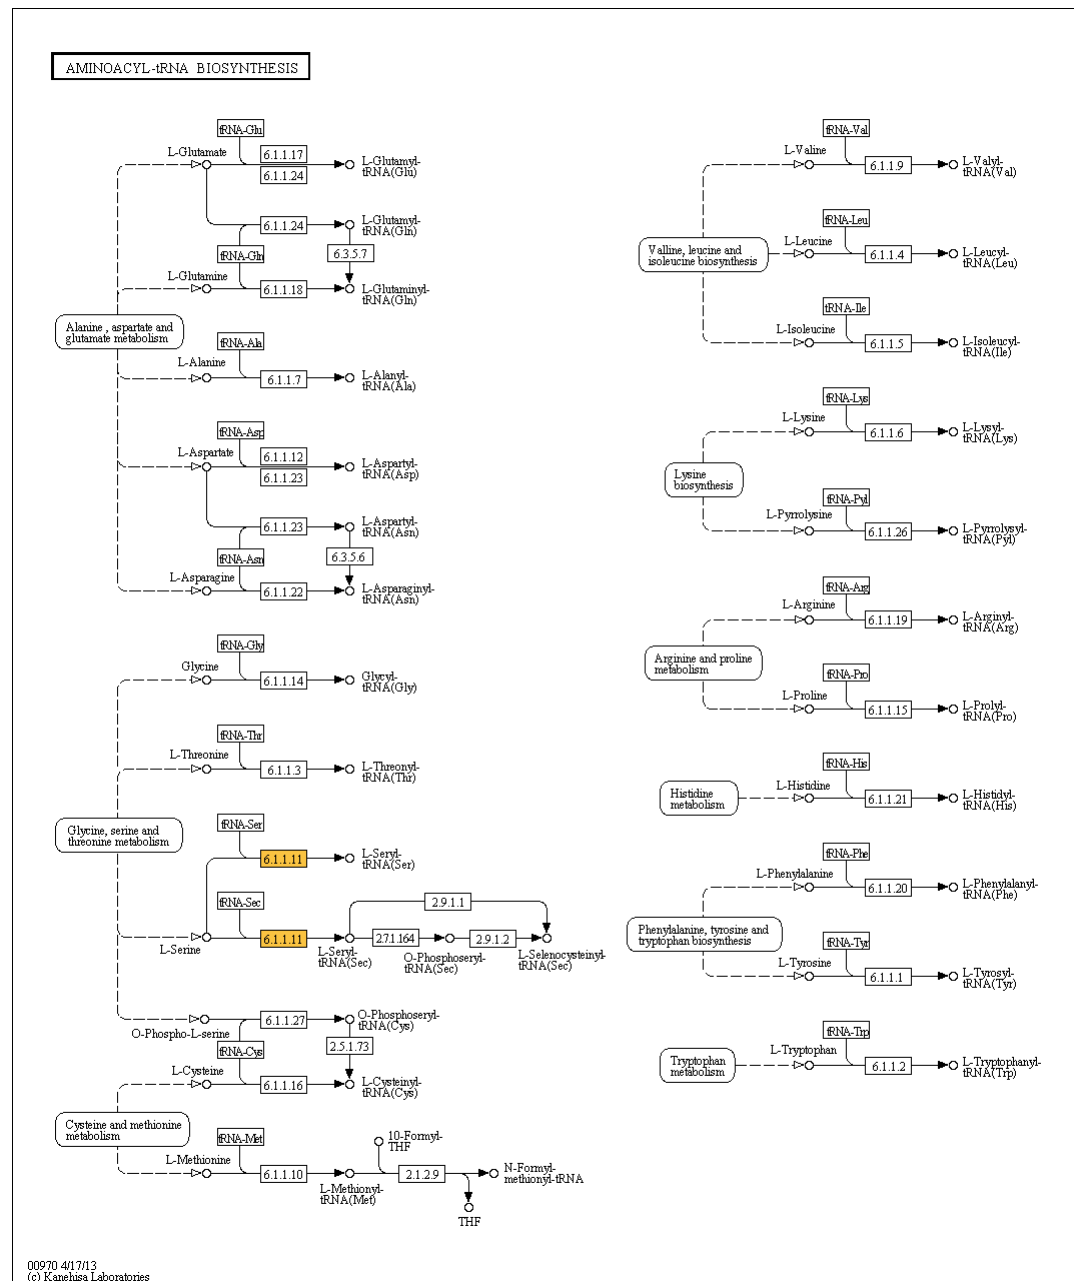

**Image S1-image map00970.** Enzyme codes (EC) in Supplemental Table S4 are highlighted with different colors (one color for each EC) in the KEGG (Kanehisa et al., 2016) map using the Blast2GO online service (<https://www.blast2go.com>).

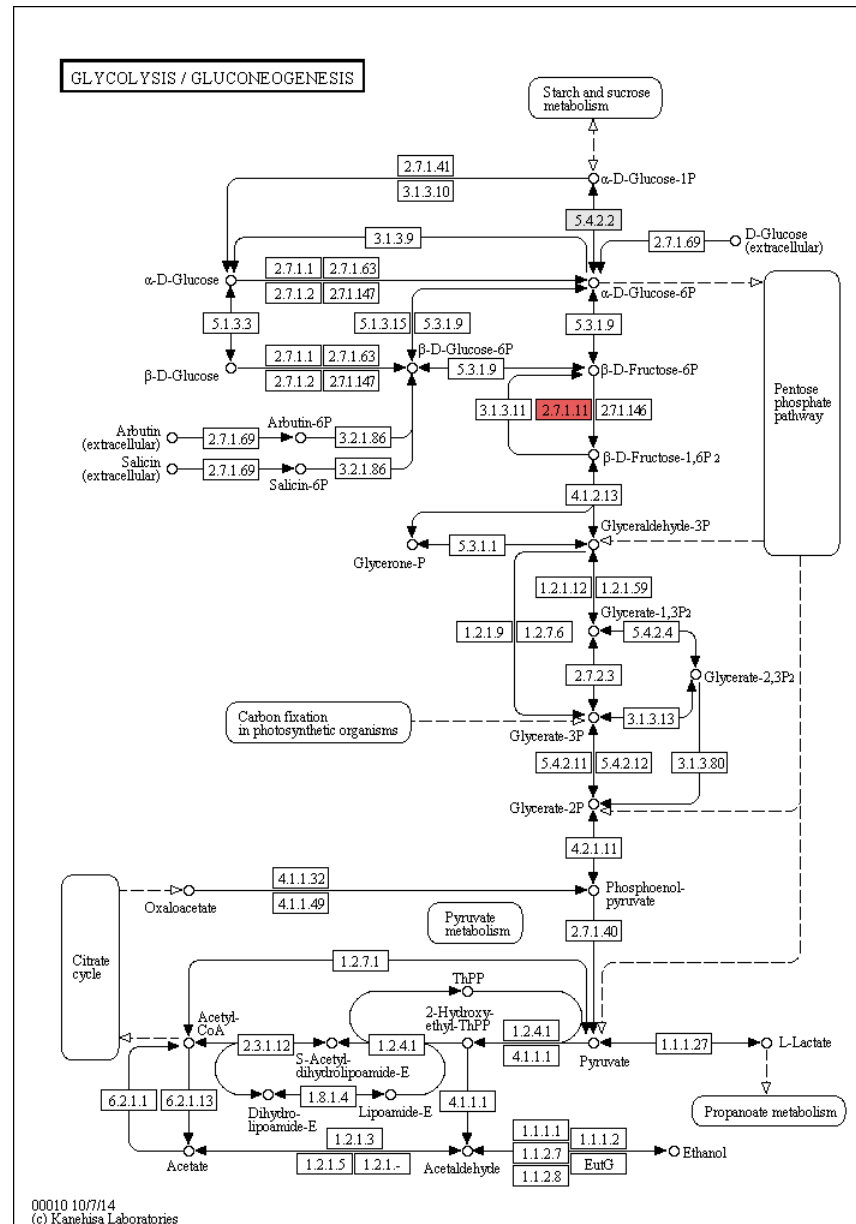

**Image S1-image map00010.** Enzyme codes (EC) in Supplemental Table S4 are highlighted with different colors (one color for each EC) in the KEGG (Kanehisa et al., 2016) map using the Blast2GO online service (<https://www.blast2go.com>).

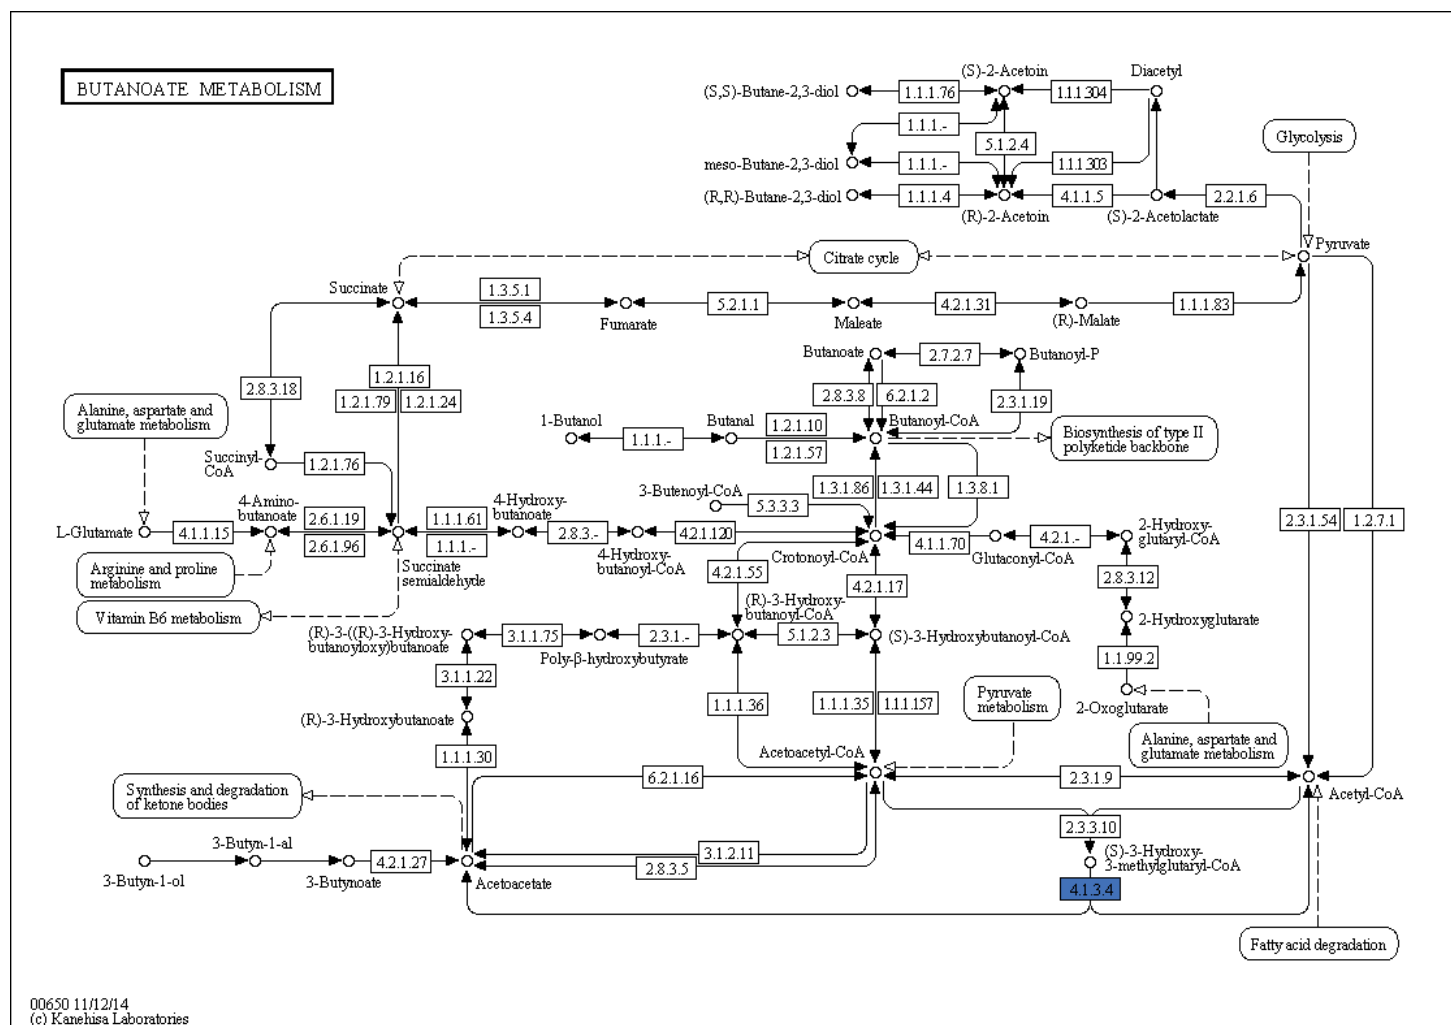

**Image S1-image map00650.** Enzyme codes (EC) in Supplemental Table S4 are highlighted with different colors (one color for each EC) in the KEGG (Kanehisa et al., 2016) map using the Blast2GO online service (<https://www.blast2go.com>).

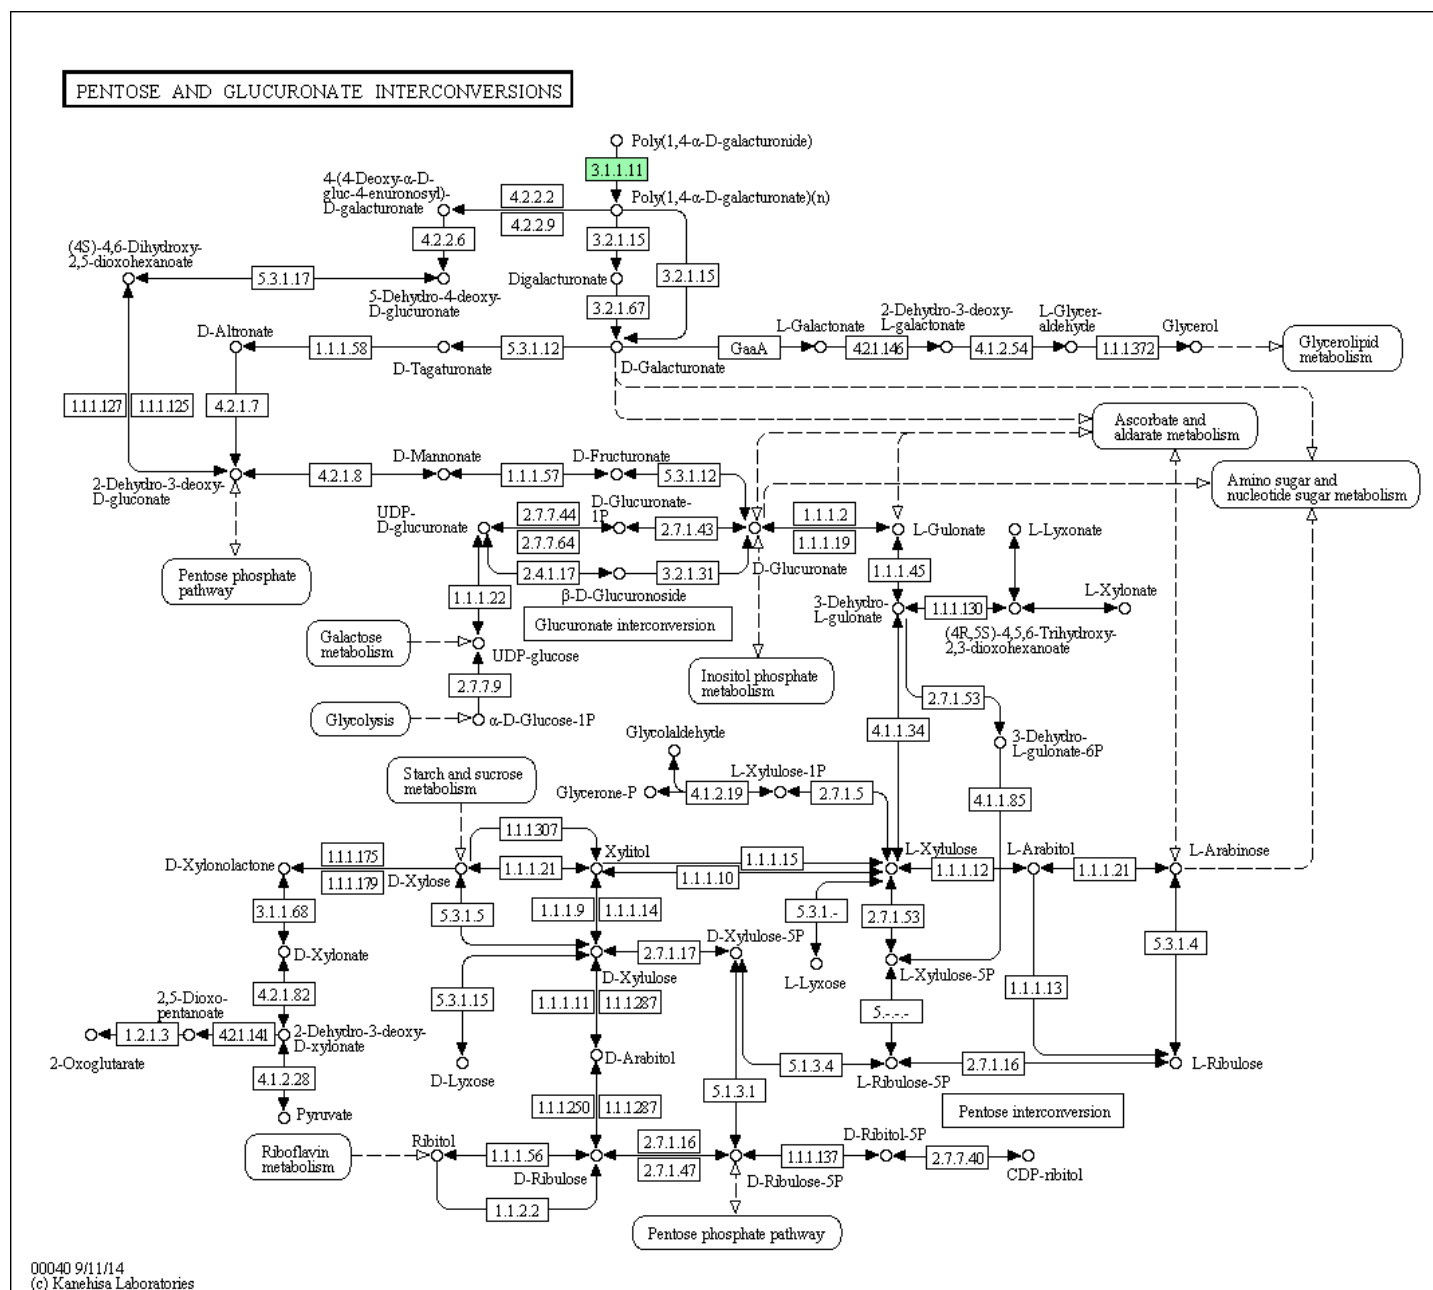

**Image S1-image map00040.** Enzyme codes (EC) in Supplemental Table S4 are highlighted with different colors (one color for each EC) in the KEGG (Kanehisa et al., 2016) map using the Blast2GO online service (<https://www.blast2go.com>).

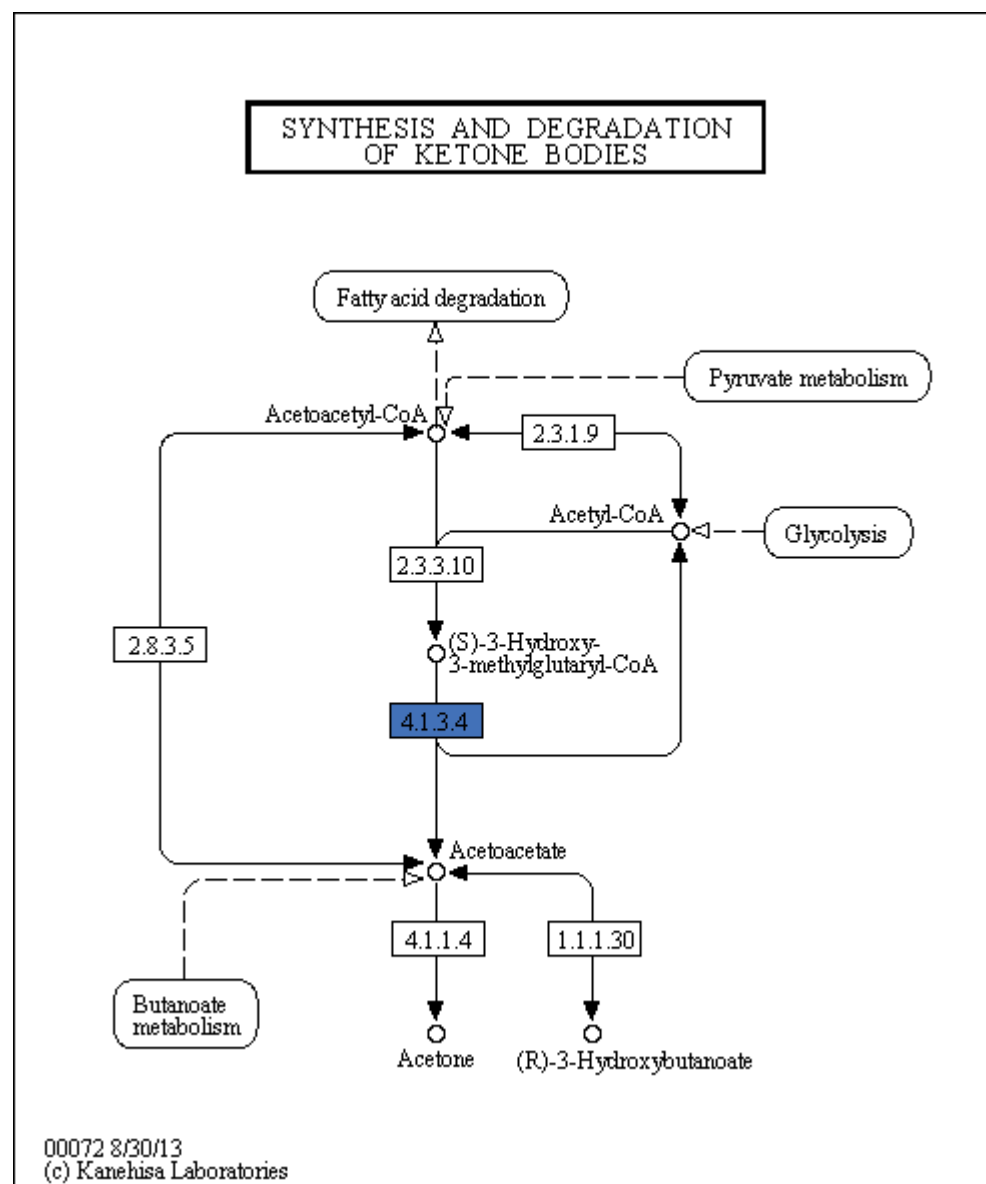

**Image S1-image map00072.** Enzyme codes (EC) in Supplemental Table S4 are highlighted with different colors (one color for each EC) in the KEGG (Kanehisa et al., 2016) map using the Blast2GO online service (<https://www.blast2go.com>).

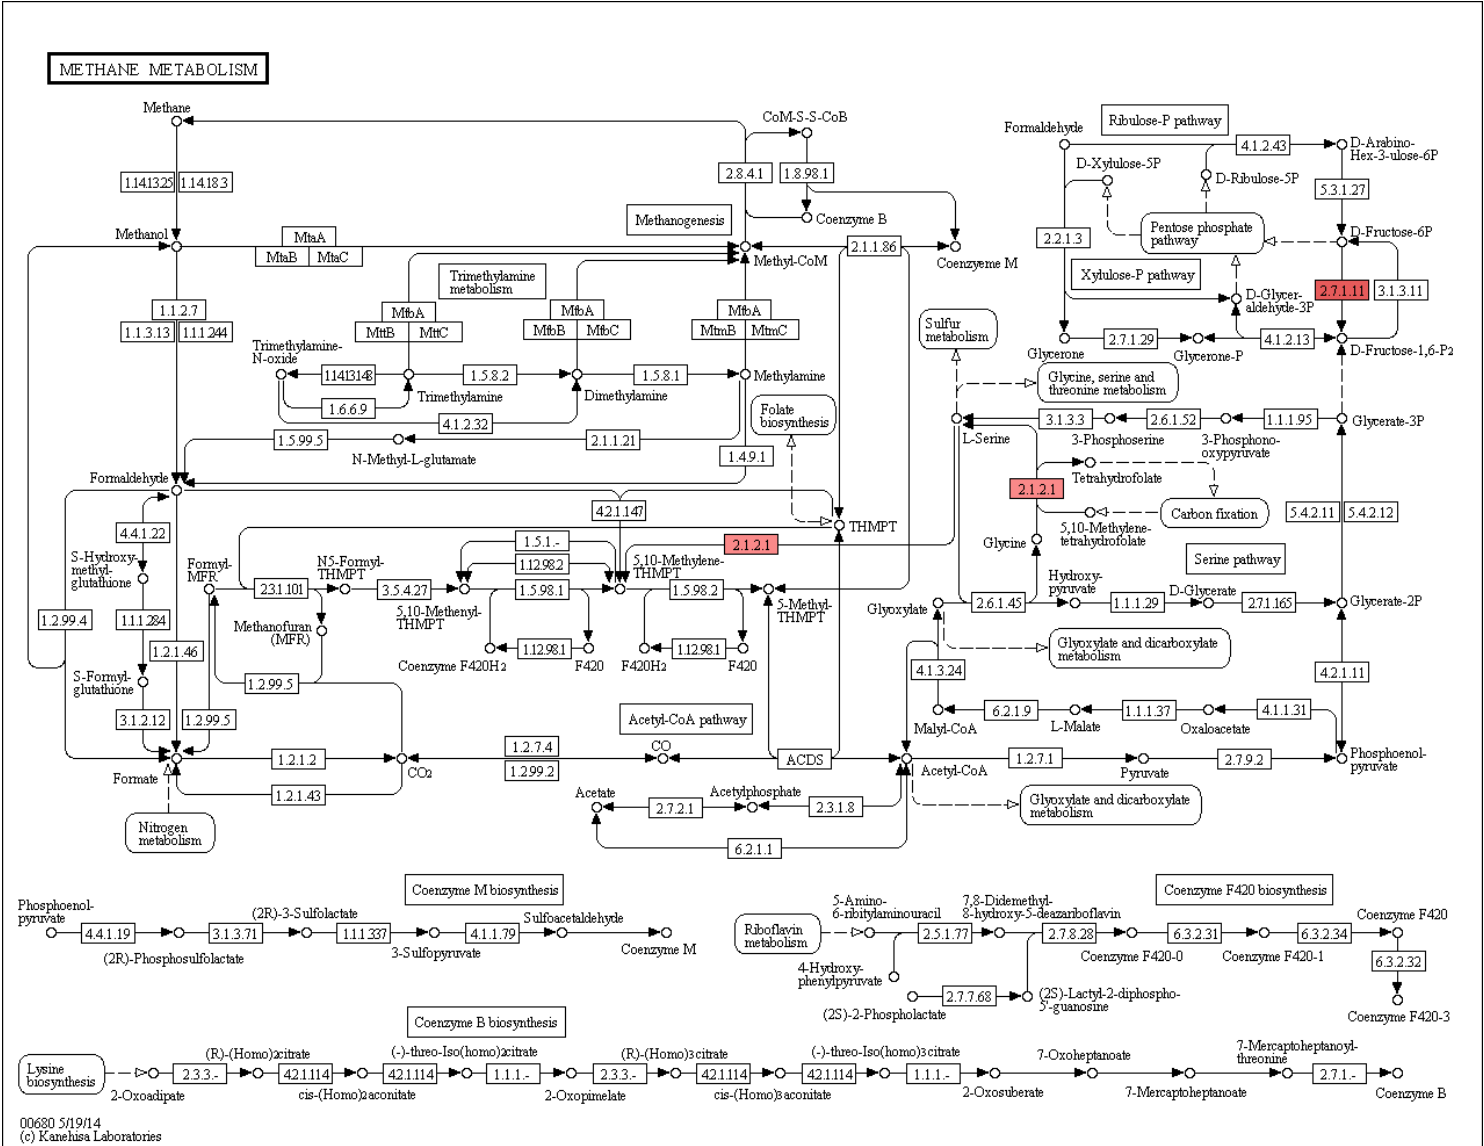

**Image S1-image map00680.** Enzyme codes (EC) in Supplemental Table S4 are highlighted with different colors (one color for each EC) in the KEGG (Kanehisa et al., 2016) map using the Blast2GO online service (<https://www.blast2go.com>).

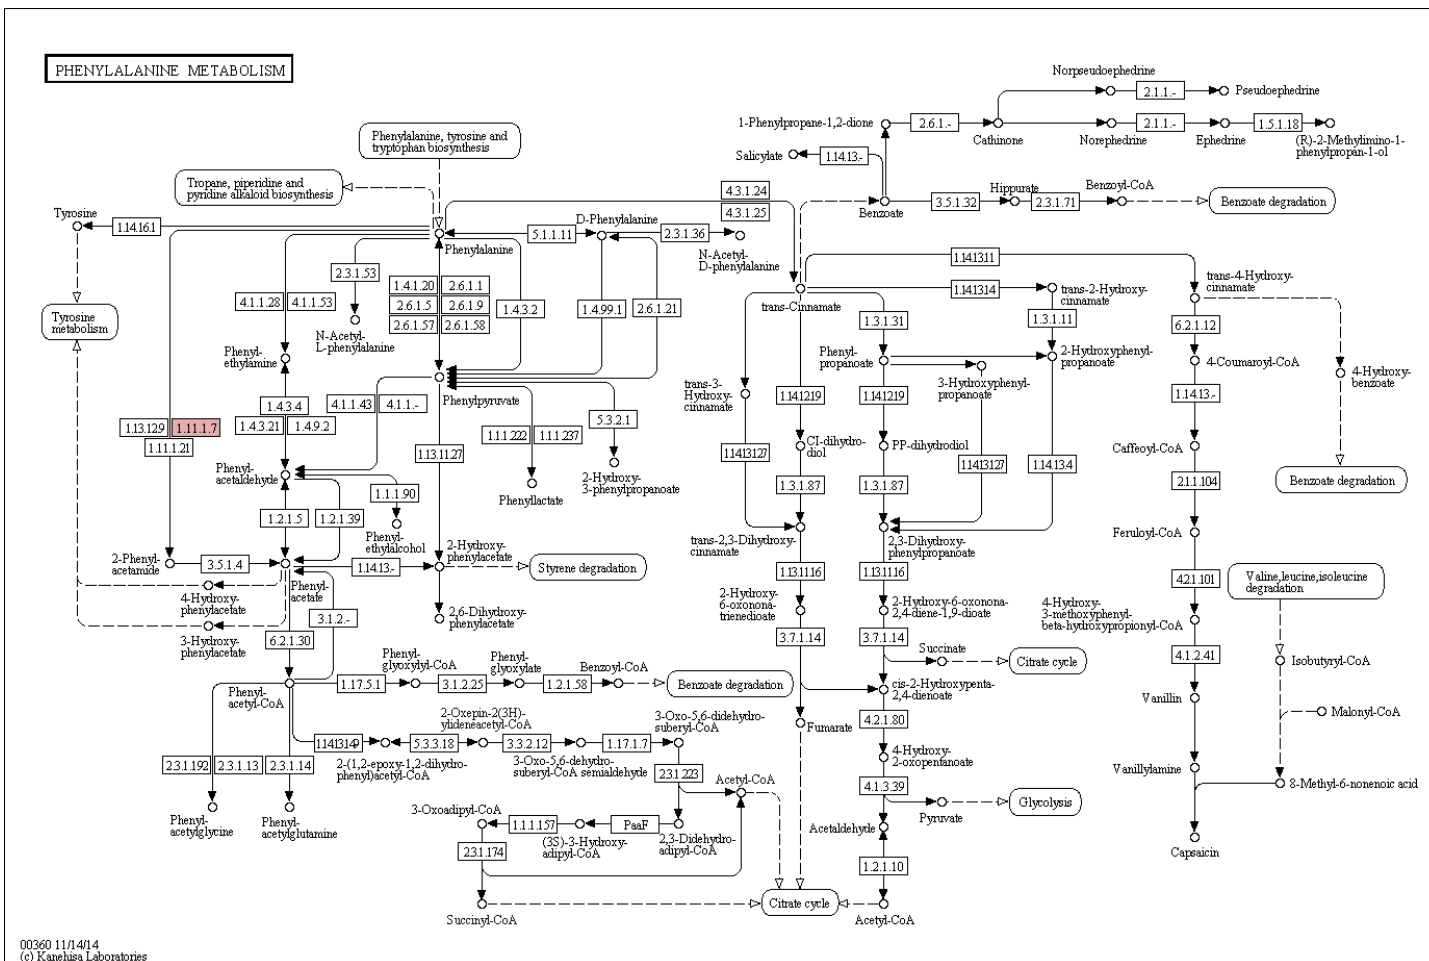

**Image S1-image map00360.** Enzyme codes (EC) in Supplemental Table S4 are highlighted with different colors (one color for each EC) in the KEGG (Kanehisa et al., 2016) map using the Blast2GO online service (<https://www.blast2go.com>).

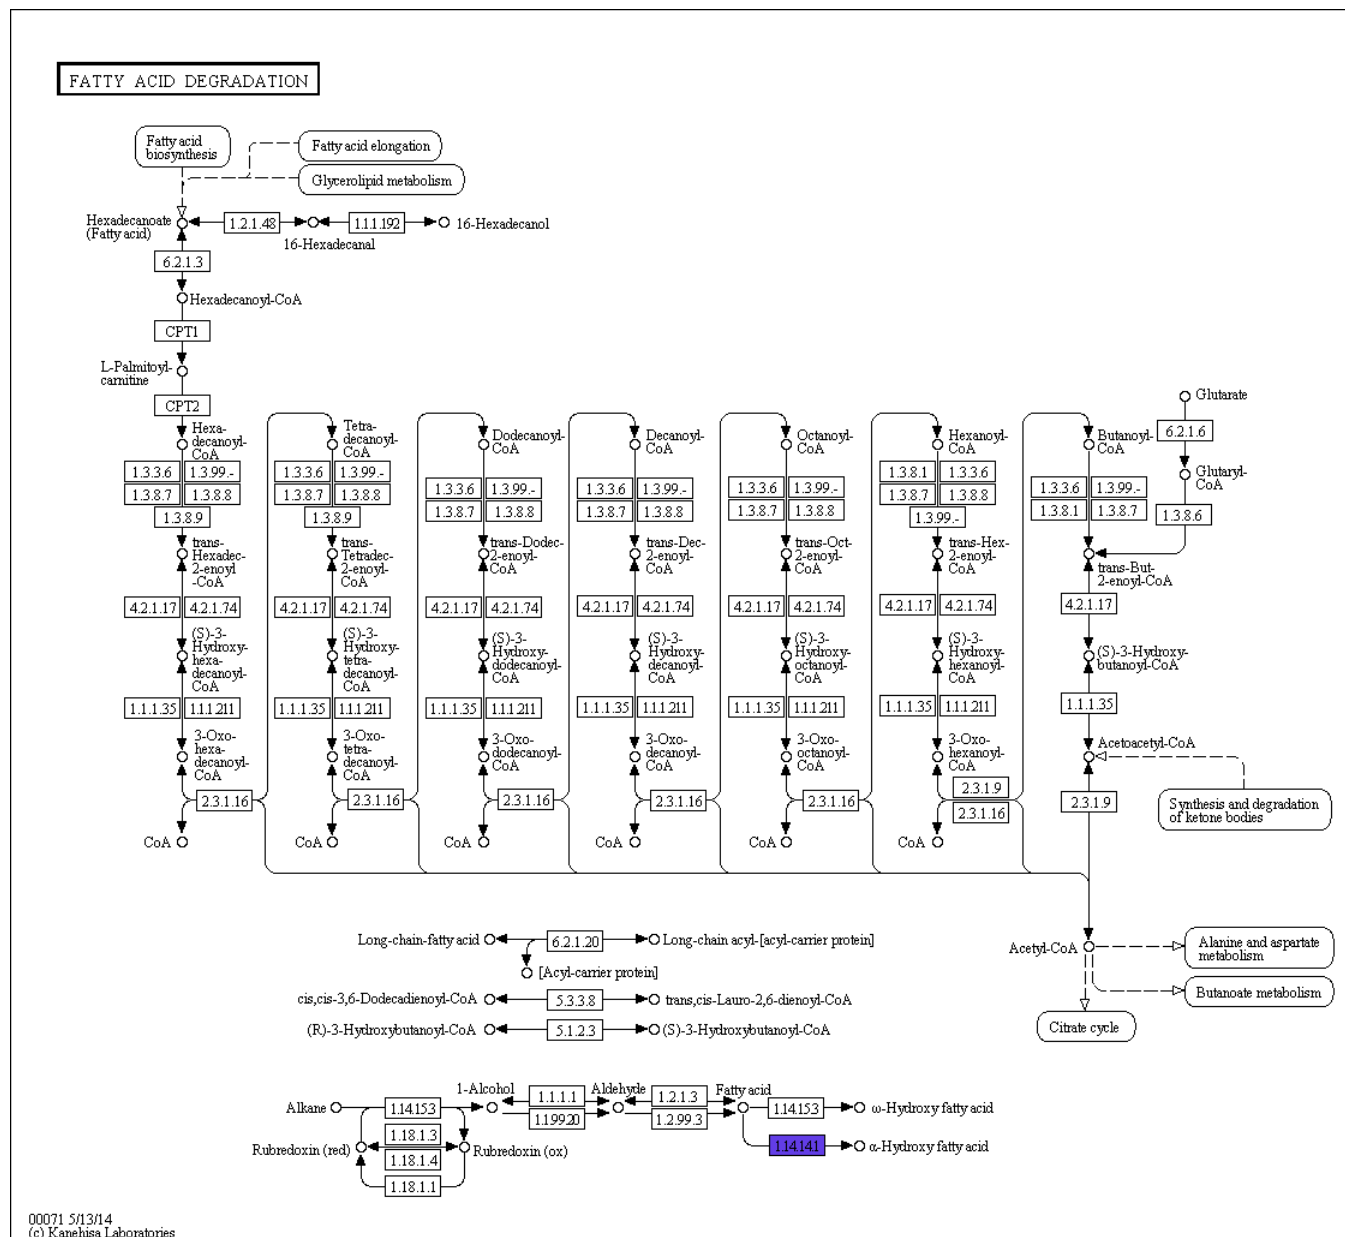

**Image S1-image map00071.** Enzyme codes (EC) in Supplemental Table S4 are highlighted with different colors (one color for each EC) in the KEGG (Kanehisa et al., 2016) map using the Blast2GO online service (<https://www.blast2go.com>).

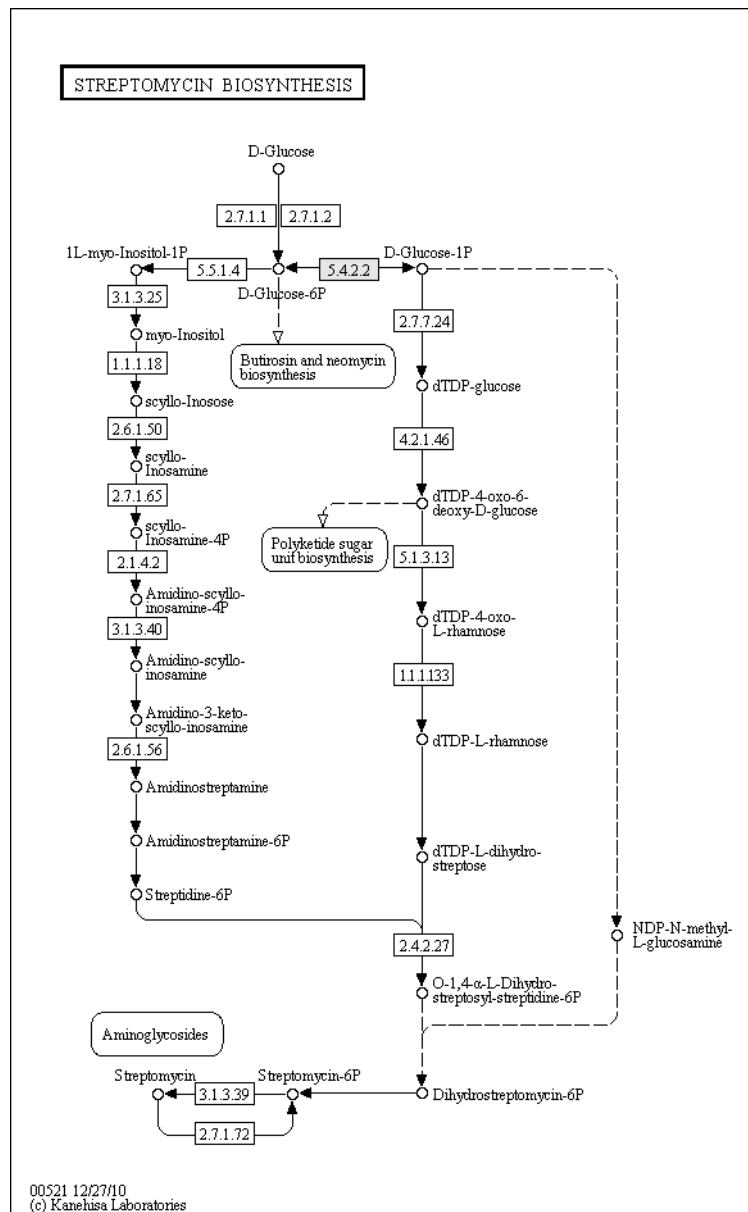

**Image S1-image map00521.** Enzyme codes (EC) in Supplemental Table S4 are highlighted with different colors (one color for each EC) in the KEGG (Kanehisa et al., 2016) map using the Blast2GO online service (<https://www.blast2go.com>).

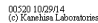

(<https://www.blast2go.com>).

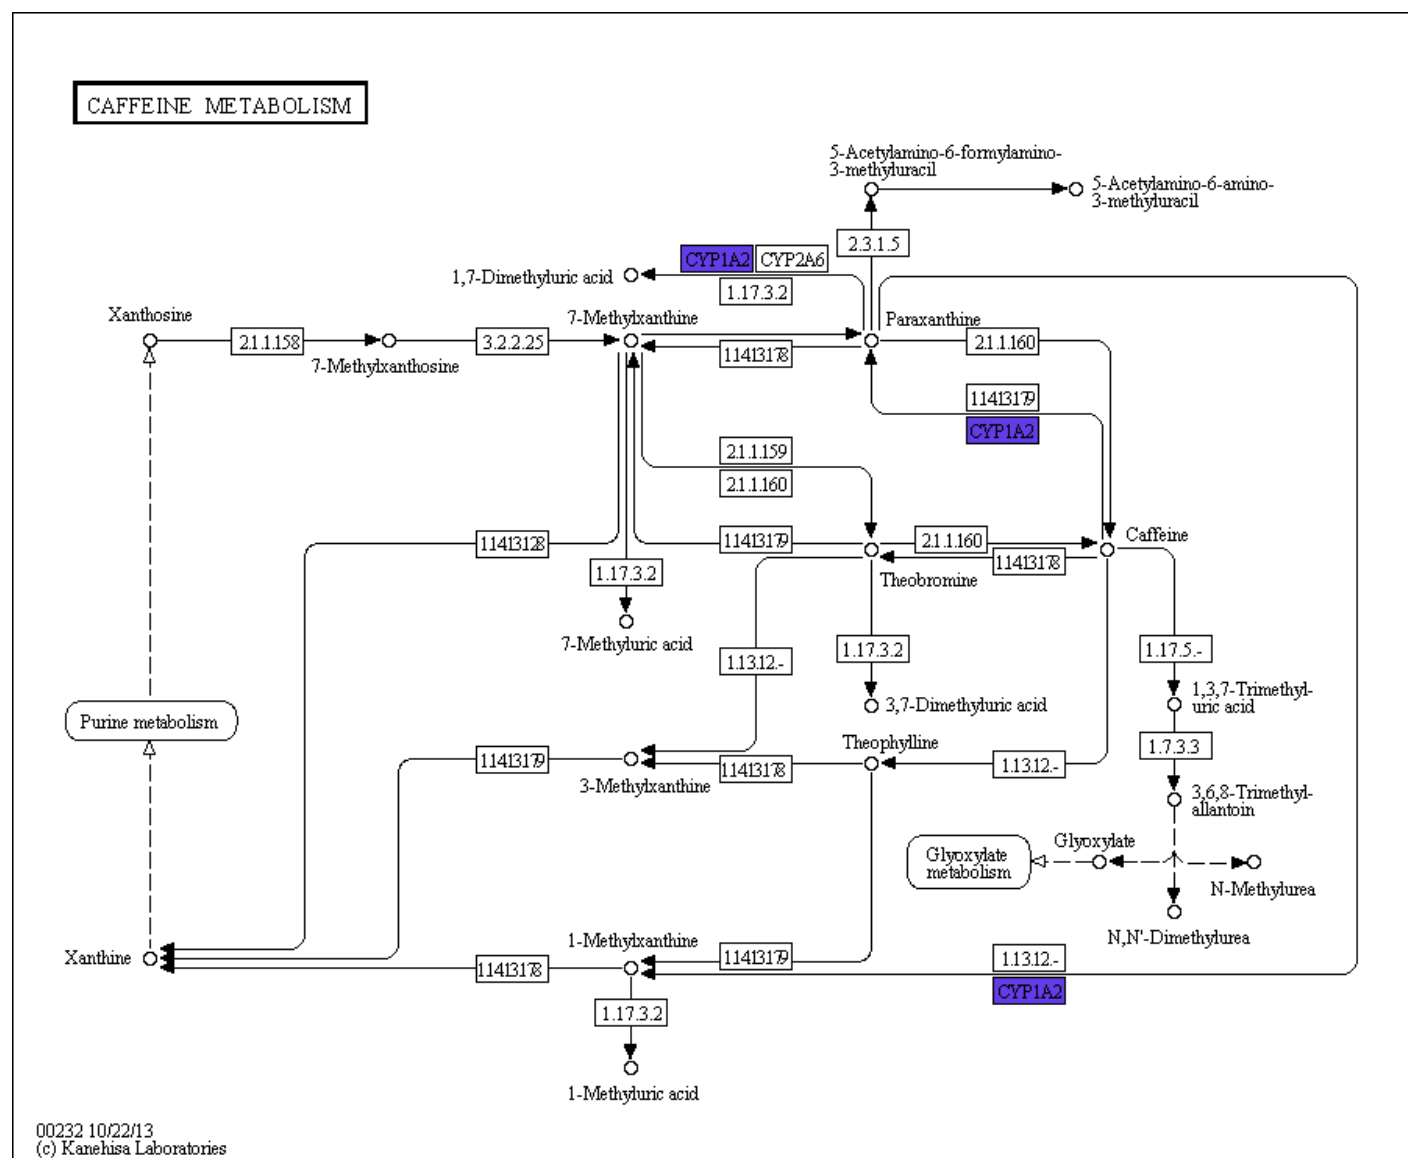

**Image S1-image map00232.** Enzyme codes (EC) in Supplemental Table S4 are highlighted with different colors (one color for each EC) in the KEGG (Kanehisa et al., 2016) map using the Blast2GO online service (<https://www.blast2go.com>).

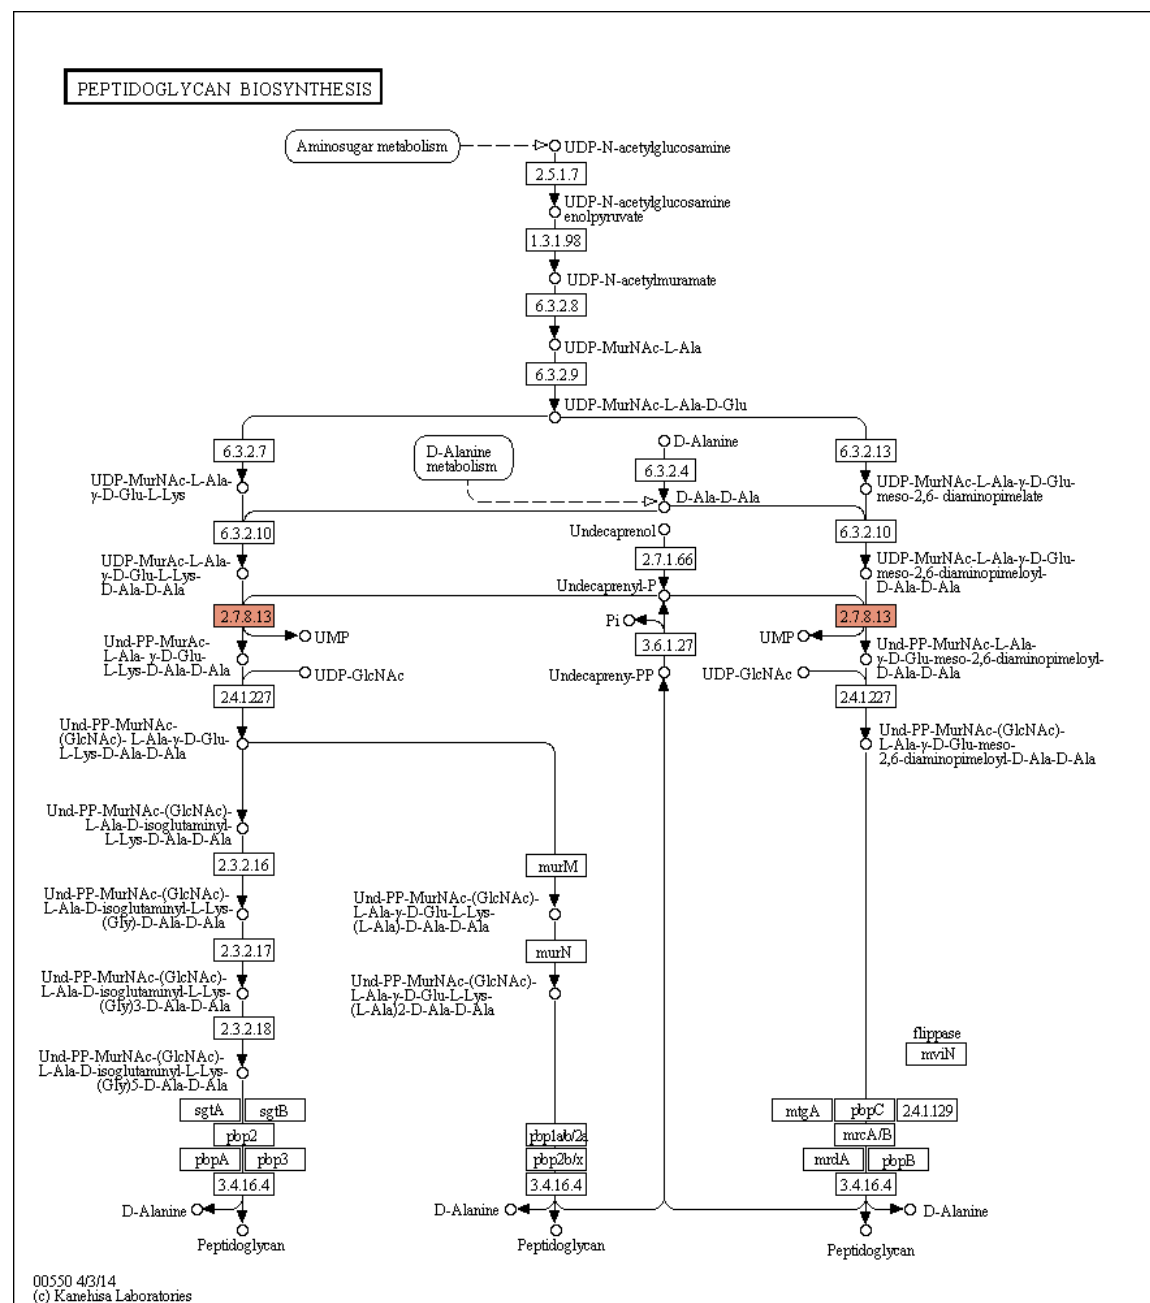

**Image S1-image map00550.** Enzyme codes (EC) in Supplemental Table S4 are highlighted with different colors (one color for each EC) in the KEGG (Kanehisa et al., 2016) map using the Blast2GO online service (<https://www.blast2go.com>).

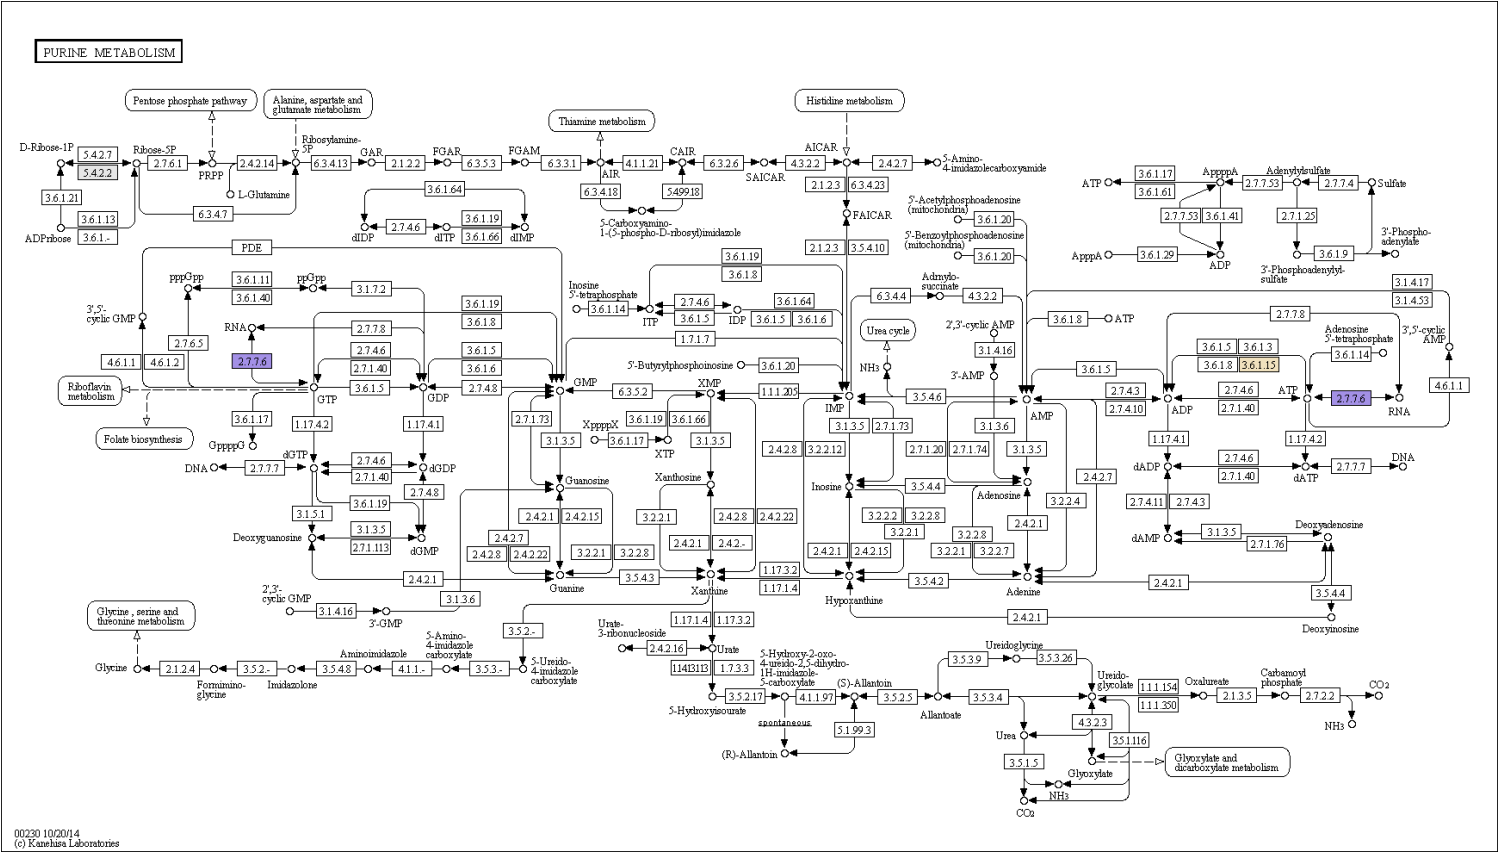

**Image S1-image map00230.** Enzyme codes (EC) in Supplemental Table S4 are highlighted with different colors (one color for each EC) in the KEGG (Kanehisa et al., 2016) map using the Blast2GO online service (<https://www.blast2go.com>).

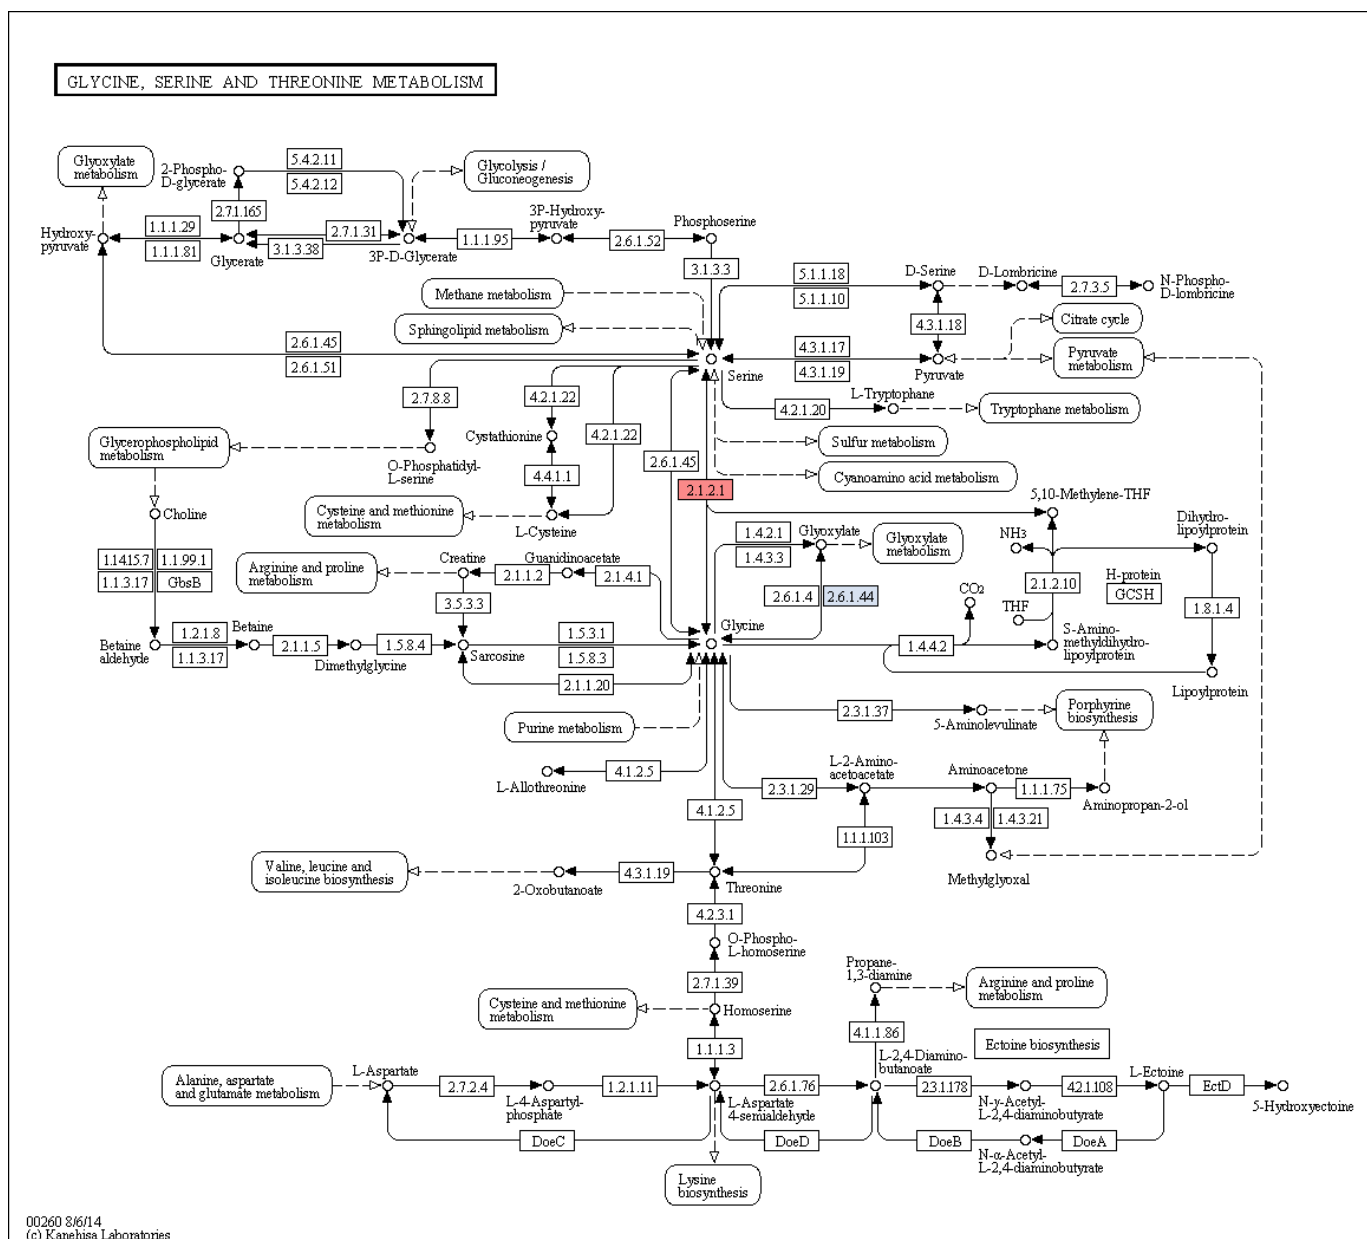

**Image S1-image map00260.** Enzyme codes (EC) in Supplemental Table S4 are highlighted with different colors (one color for each EC) in the KEGG (Kanehisa et al., 2016) map using the Blast2GO online service (<https://www.blast2go.com>).

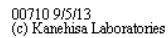

**Image S1-image map00710.** Enzyme codes (EC) in Supplemental Table S4 are highlighted with different colors (one color for each EC) in the KEGG (Kanehisa et al., 2016) map using the Blast2GO online service (<https://www.blast2go.com>).

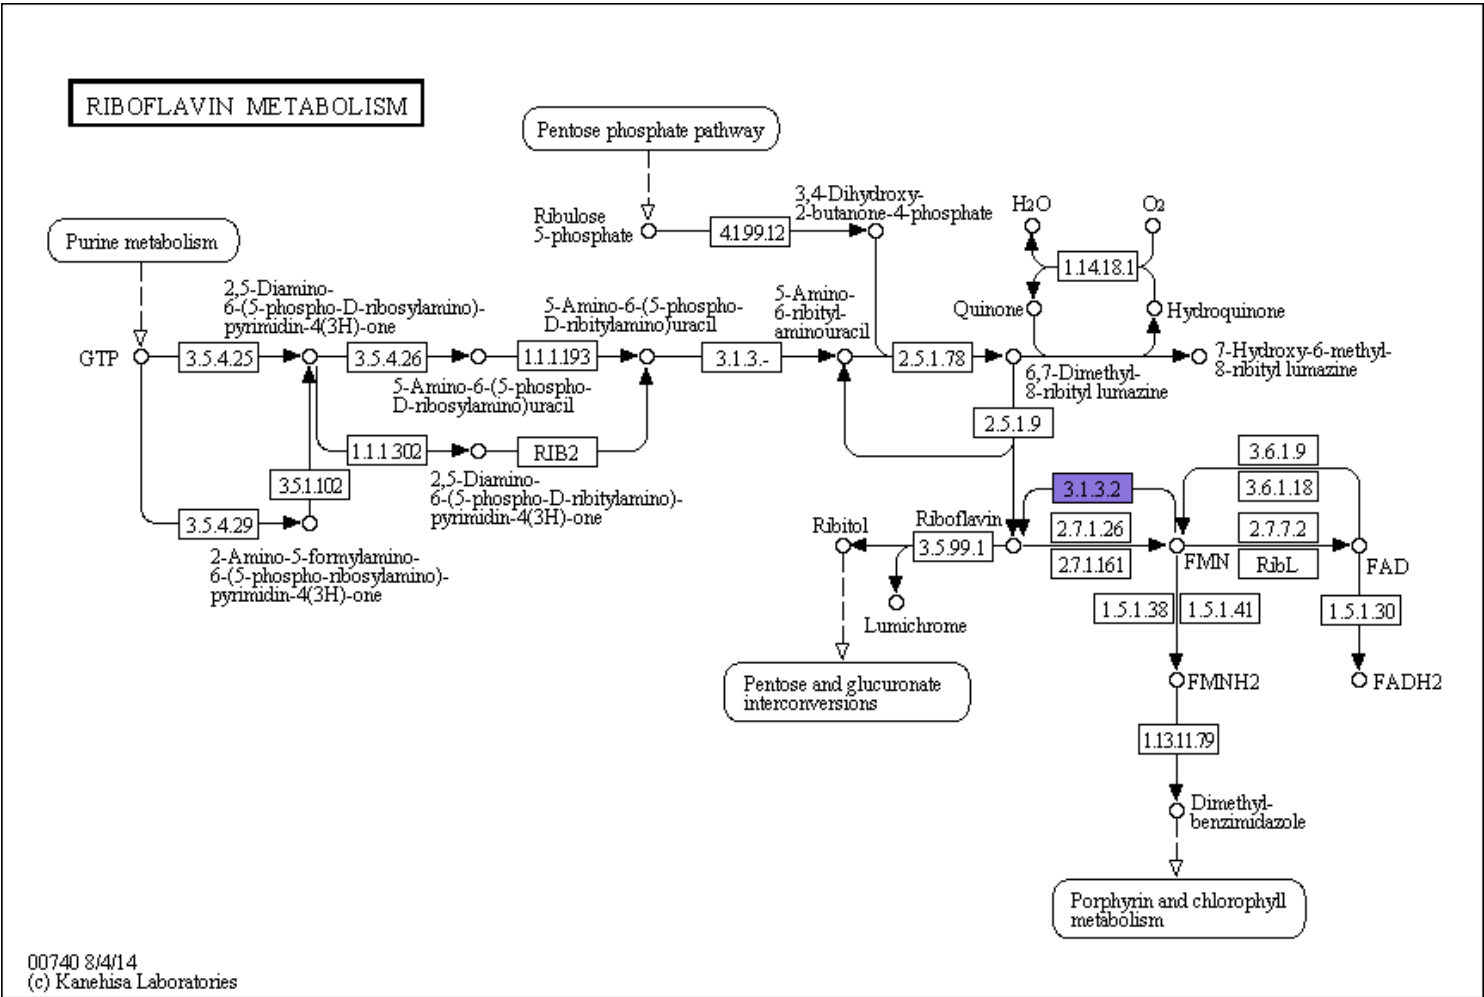

**Image S1-image map00740.** Enzyme codes (EC) in Supplemental Table S4 are highlighted with different colors (one color for each EC) in the KEGG (Kanehisa et al., 2016) map using the Blast2GO online service (<https://www.blast2go.com>).

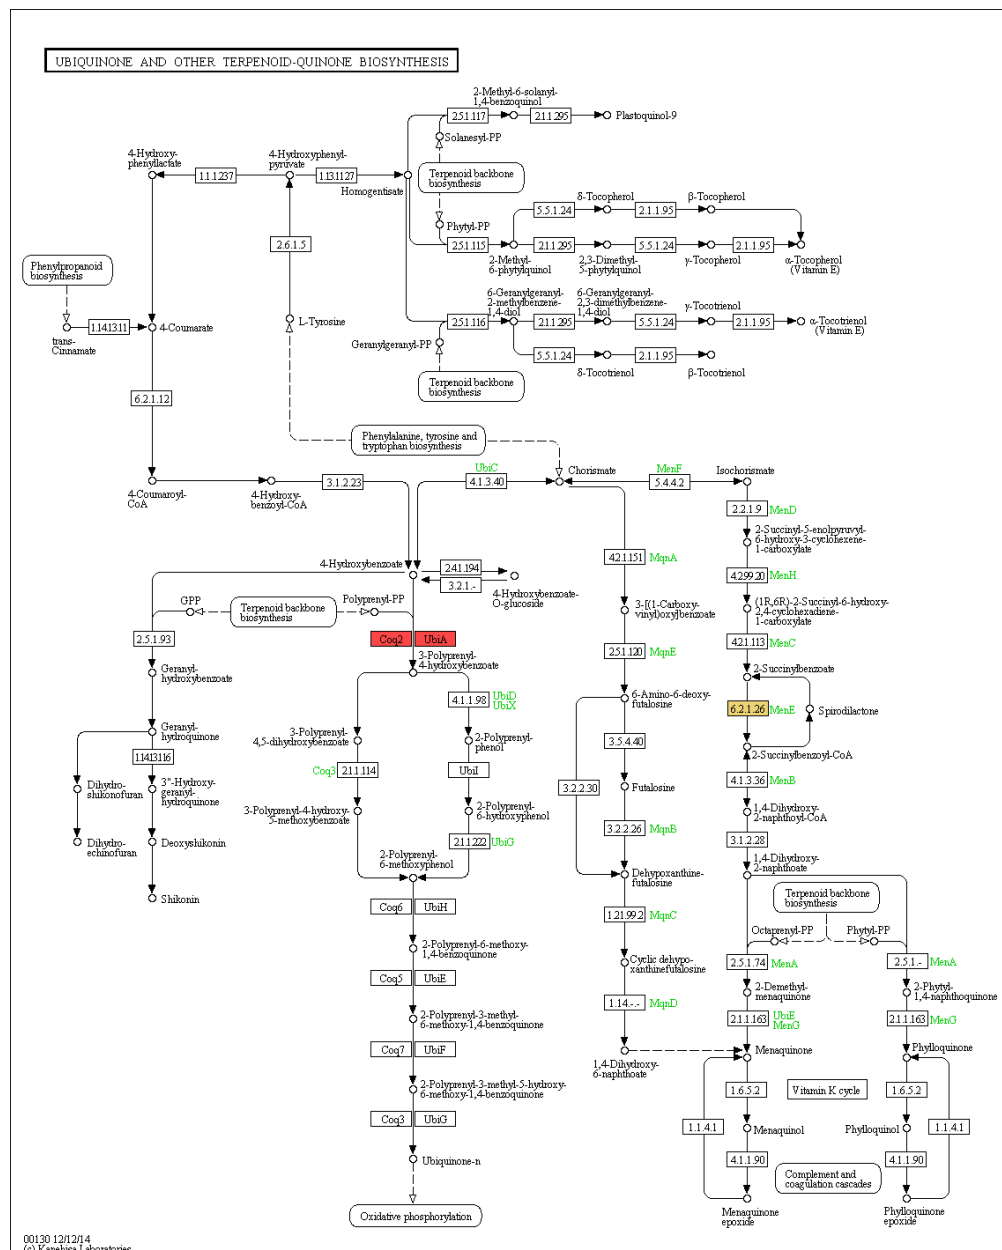

**Image S1-image map00130.** Enzyme codes (EC) in Supplemental Table S4 are highlighted with different colors (one color for each EC) in the KEGG (Kanehisa et al., 2016) map using the Blast2GO online service (<https://www.blast2go.com>).



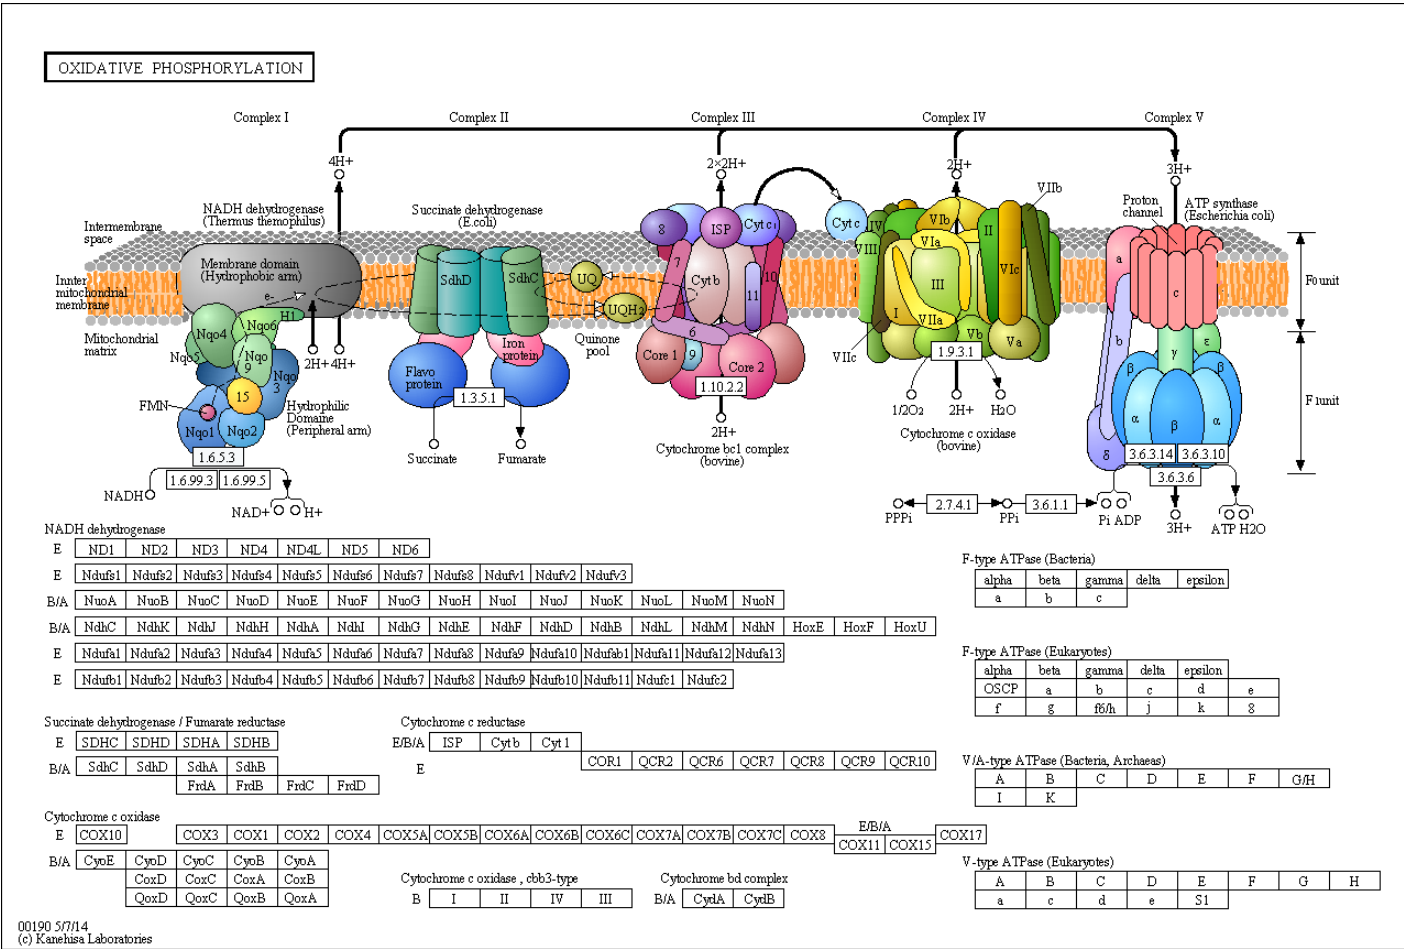

**Image S1-image map00190.** Enzyme codes (EC) in Supplemental Table S4 are highlighted with different colors (one color for each EC) in the KEGG (Kanehisa et al., 2016) map using the Blast2GO online service (<https://www.blast2go.com>).

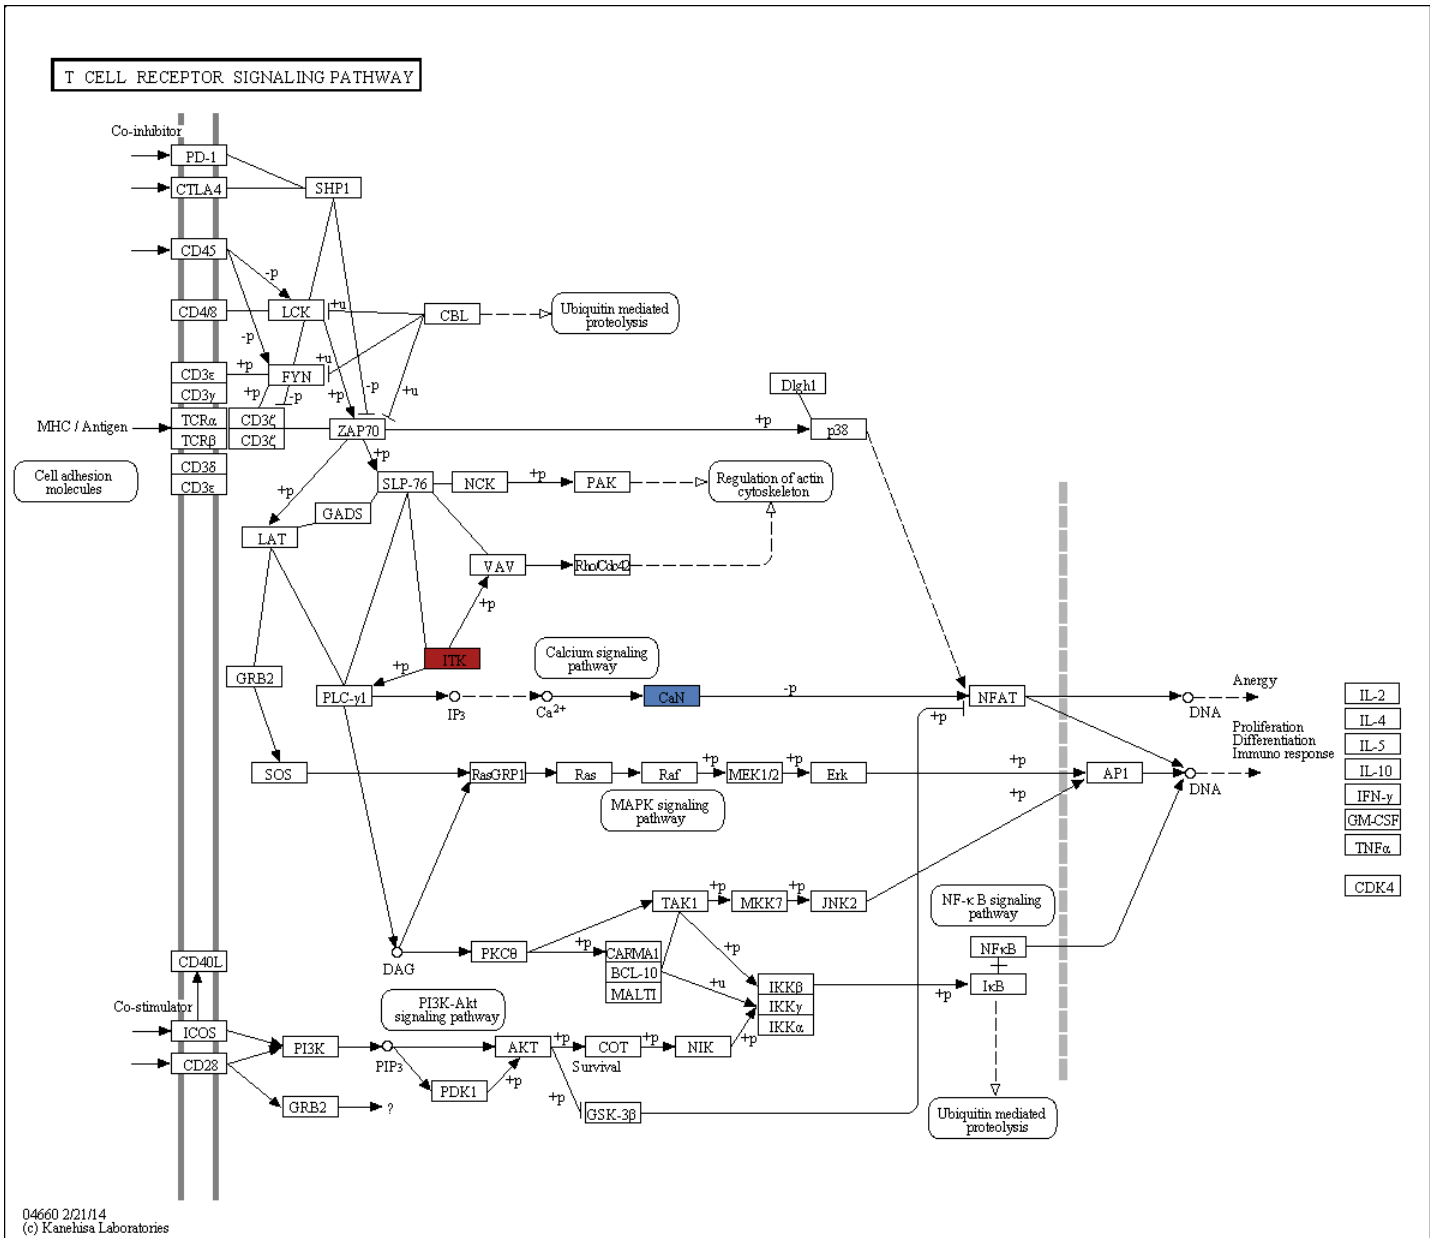

**Image S1-image map04660.** Enzyme codes (EC) in Supplemental Table S4 are highlighted with different colors (one color for each EC) in the KEGG (Kanehisa et al., 2016) map using the Blast2GO online service (<https://www.blast2go.com>).

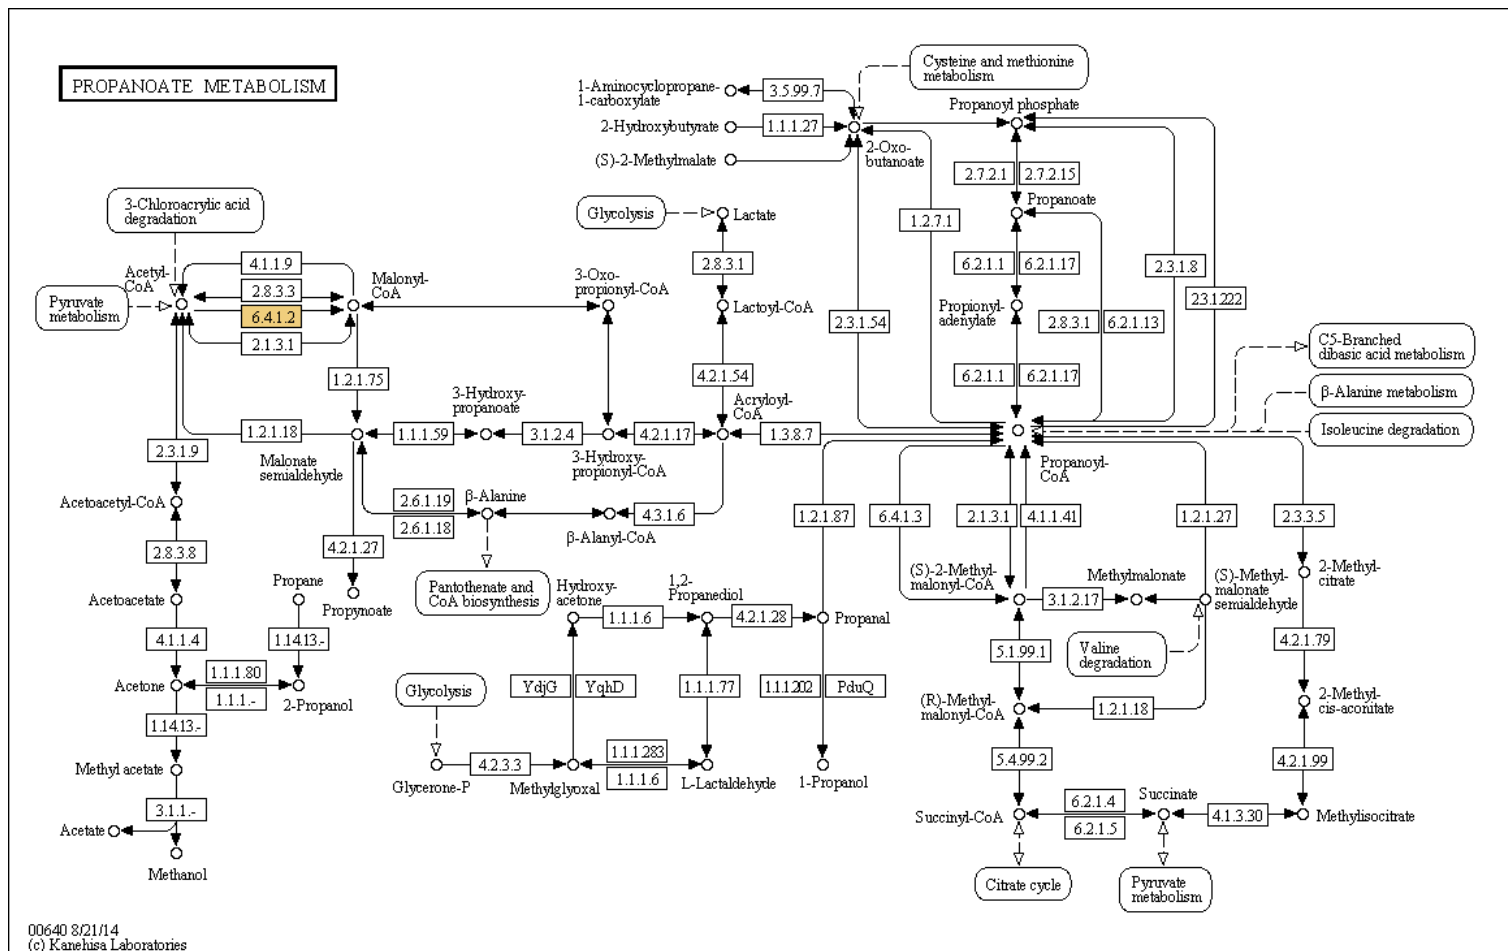

**Image S1-image map00640.** Enzyme codes (EC) in Supplemental Table S4 are highlighted with different colors (one color for each EC) in the KEGG (Kanehisa et al., 2016) map using the Blast2GO online service (<https://www.blast2go.com>).

Ima. S1-image map00670

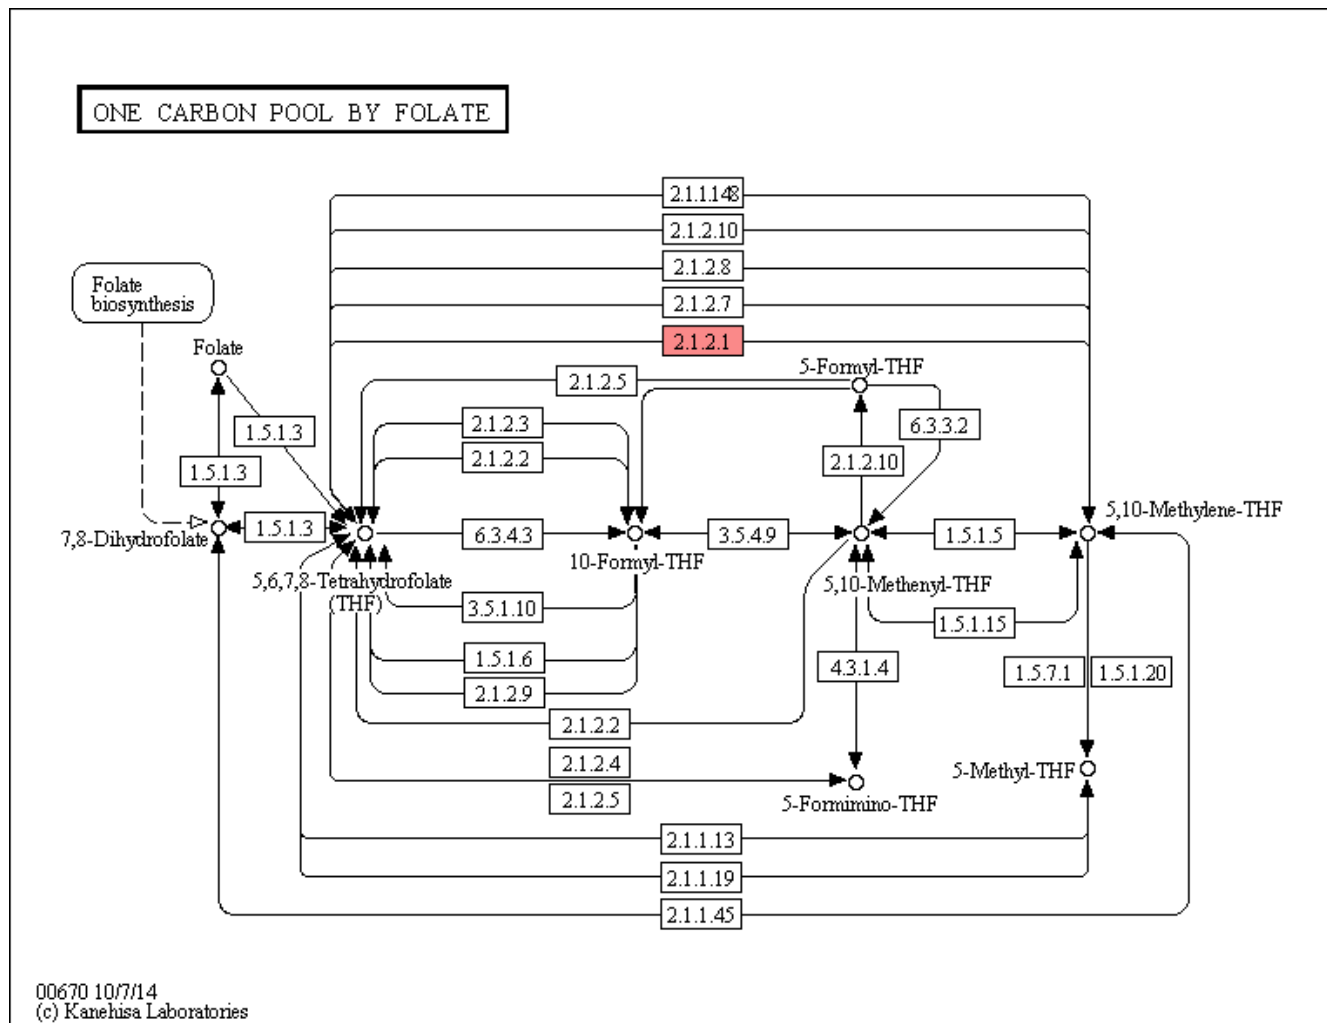

**Image S1-image map00670.** Enzyme codes (EC) in Supplemental Table S4 are highlighted with different colors (one color for each EC) in the KEGG (Kanehisa et al., 2016) map using the Blast2GO online service (<https://www.blast2go.com>).



Ima. S1-image map00061

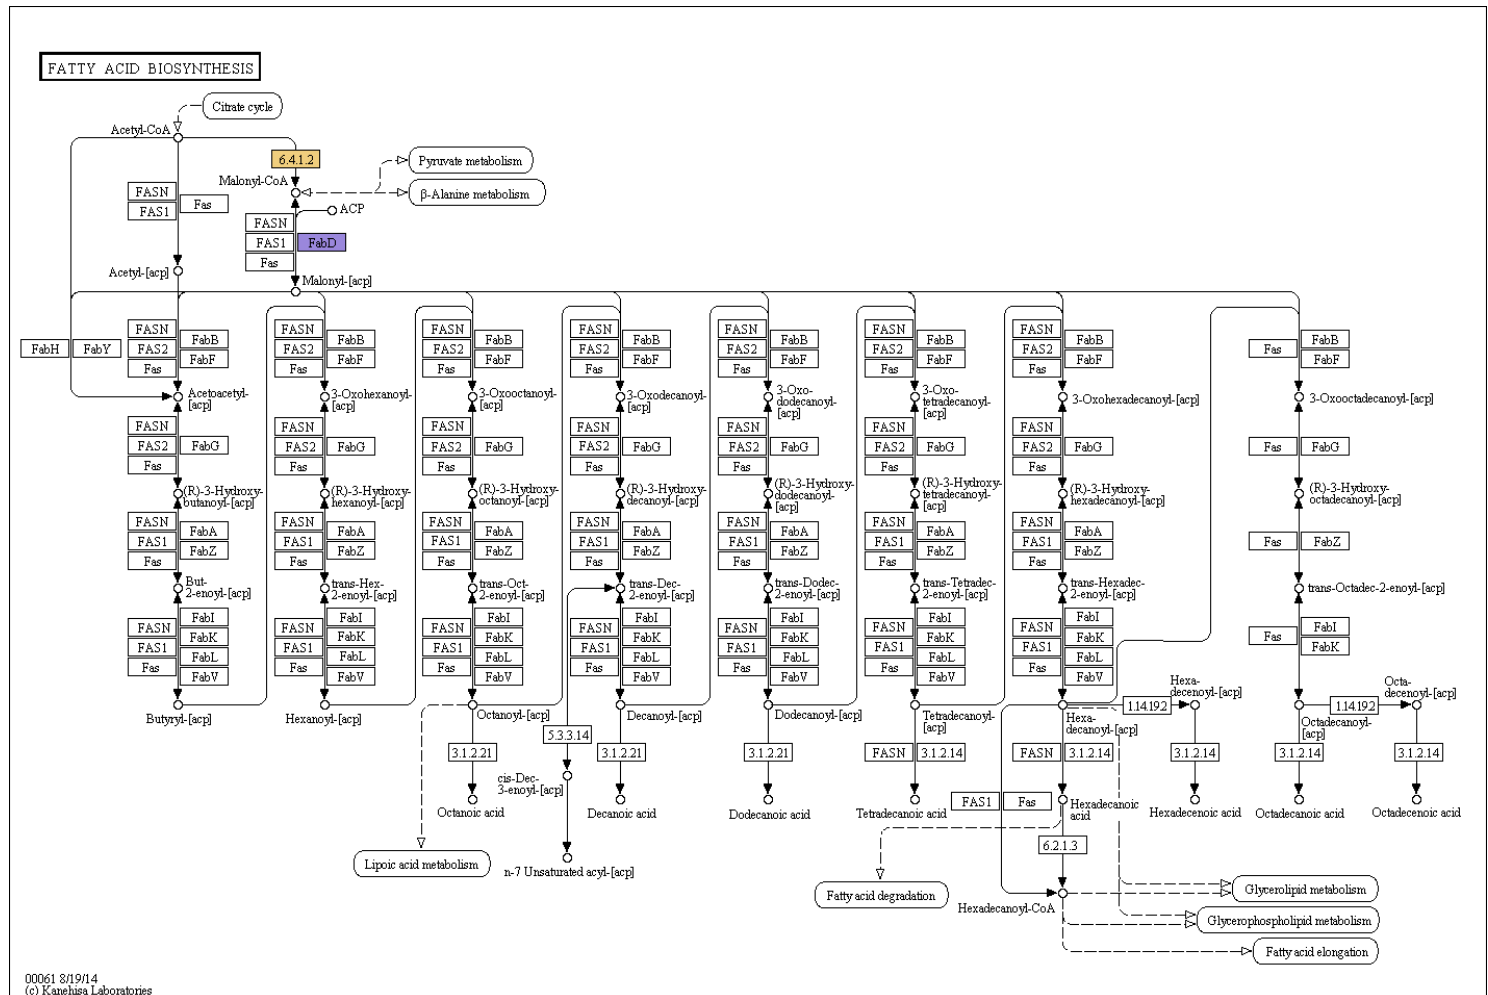

**Image S1-image map00061.** Enzyme codes (EC) in Supplemental Table S4 are highlighted with different colors (one color for each EC) in the KEGG (Kanehisa et al., 2016) map using the Blast2GO online service (<https://www.blast2go.com>).

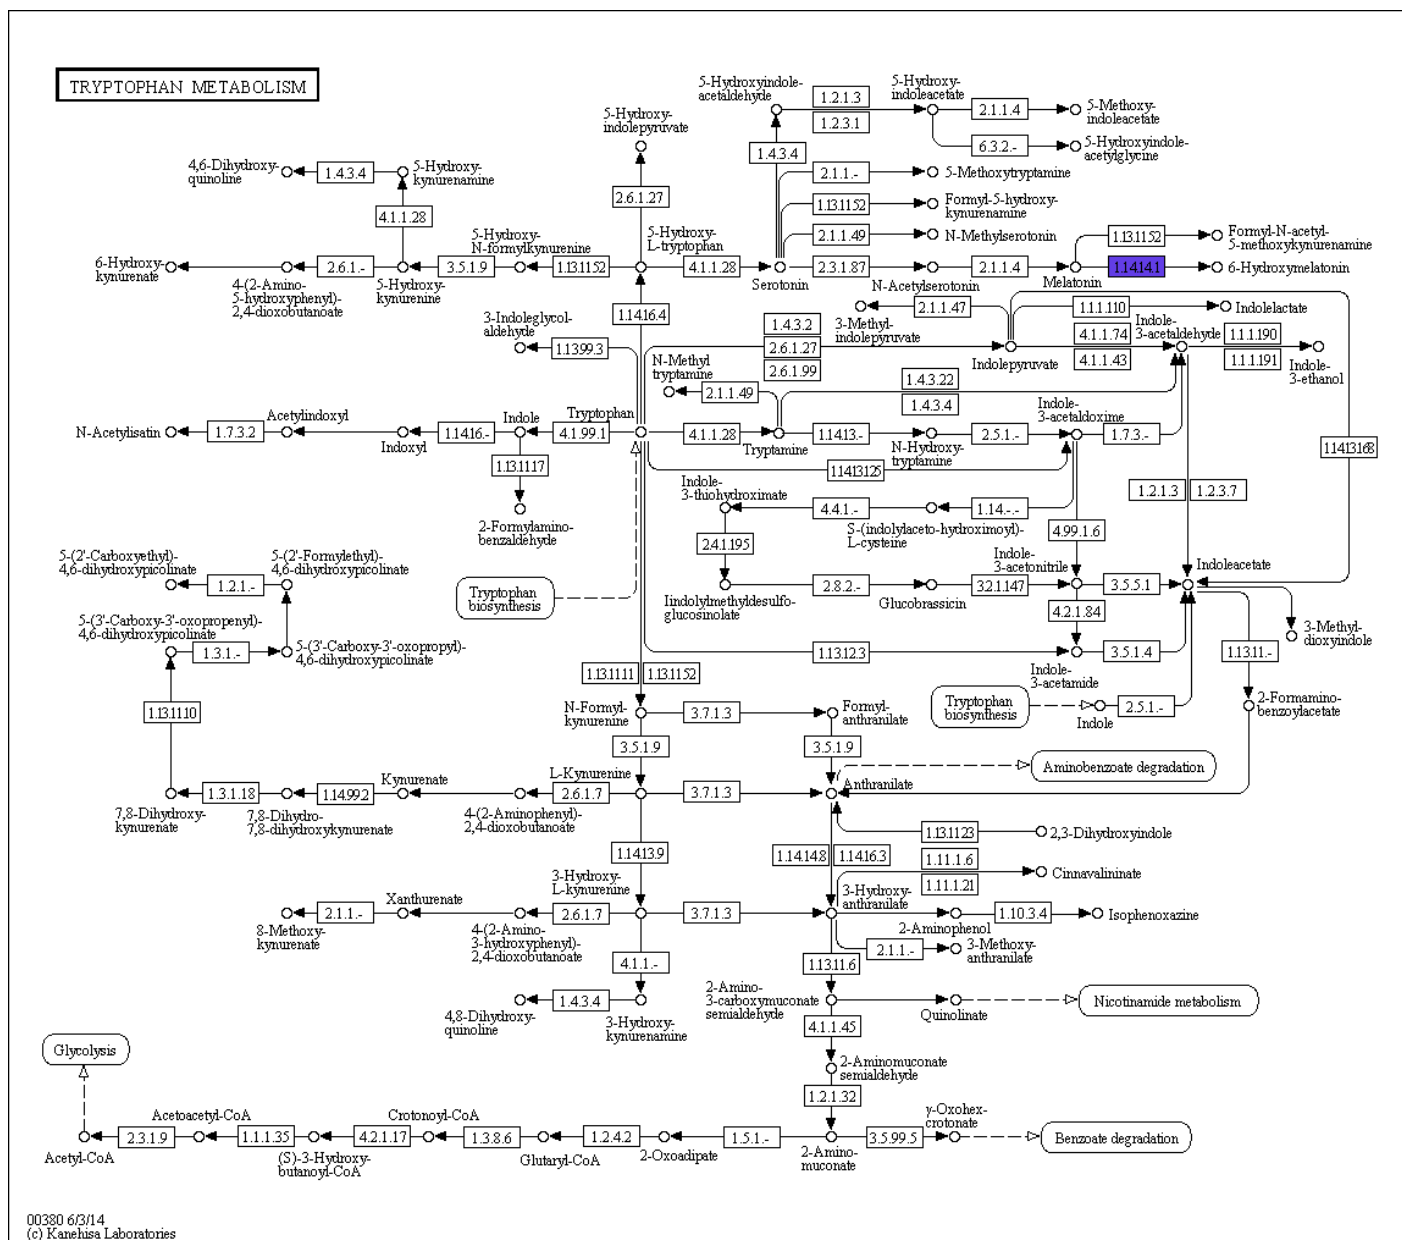

**Image S1-image map00380.** Enzyme codes (EC) in Supplemental Table S4 are highlighted with different colors (one color for each EC) in the KEGG (Kanehisa et al., 2016) map using the Blast2GO online service (<https://www.blast2go.com>).

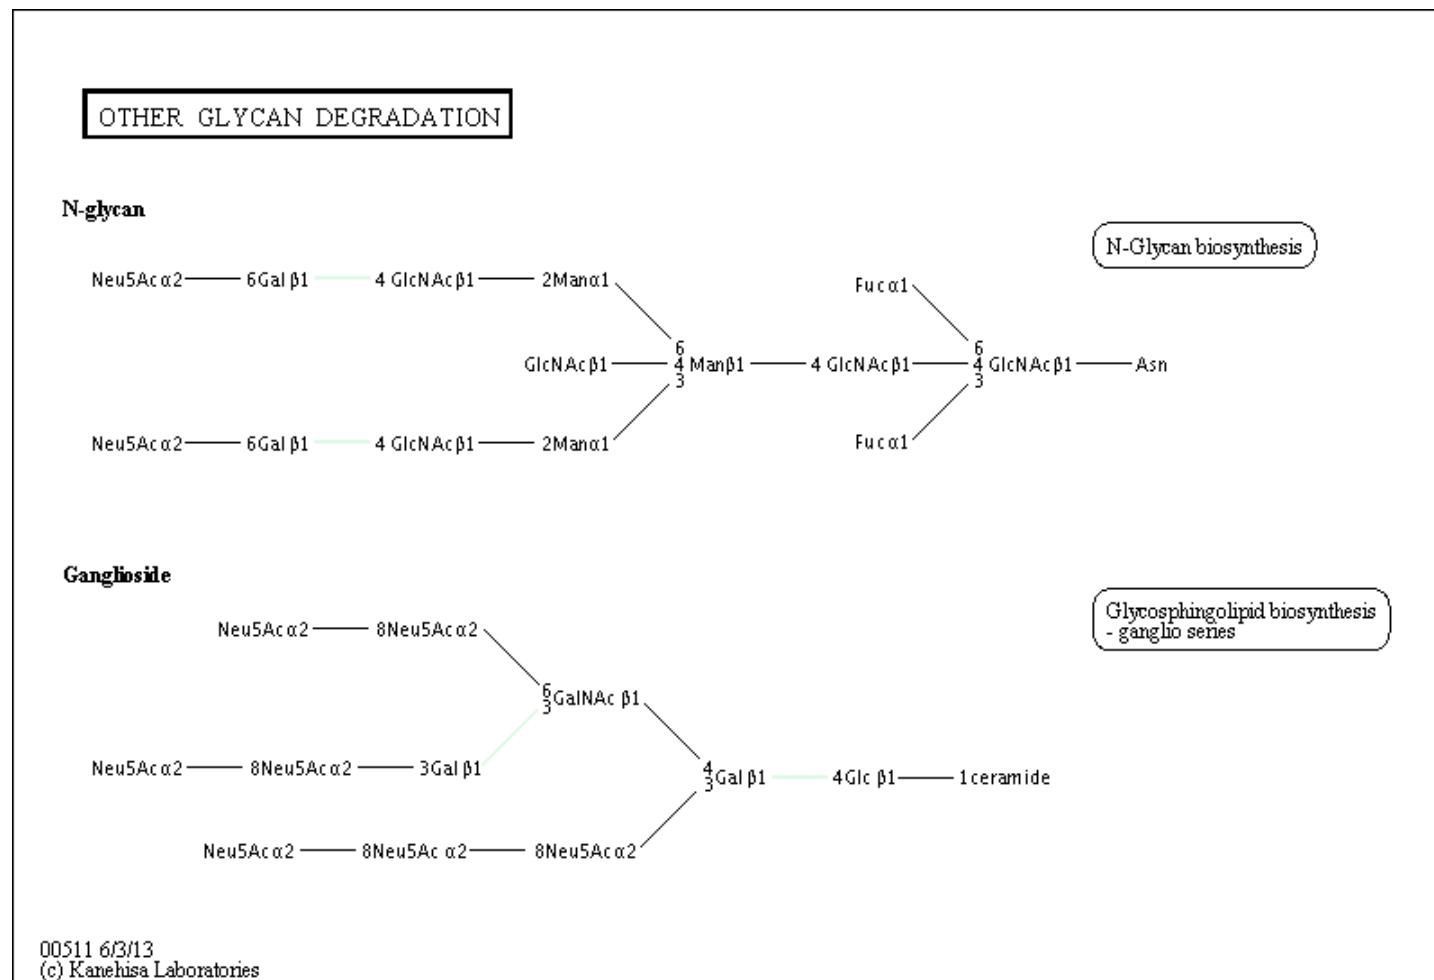

**Image S1-image map00511.** Enzyme codes (EC) in Supplemental Table S4 are highlighted with different colors (one color for each EC) in the KEGG (Kanehisa et al., 2016) map using the Blast2GO online service (<https://www.blast2go.com>).

[illegible]

**Image S1-image map00254.** Enzyme codes (EC) in Supplemental Table S4 are highlighted with different colors (one color for each EC) in the KEGG (Kanehisa et al., 2016) map using the Blast2GO online service (<https://www.blast2go.com>).

**Image S1-image map00830.** Enzyme codes (EC) in Supplemental Table S4 are highlighted with different colors (one color for each EC) in the KEGG (Kanehisa et al., 2016) map using the Blast2GO online service (<https://www.blast2go.com>).



Ima. S1-image map00253

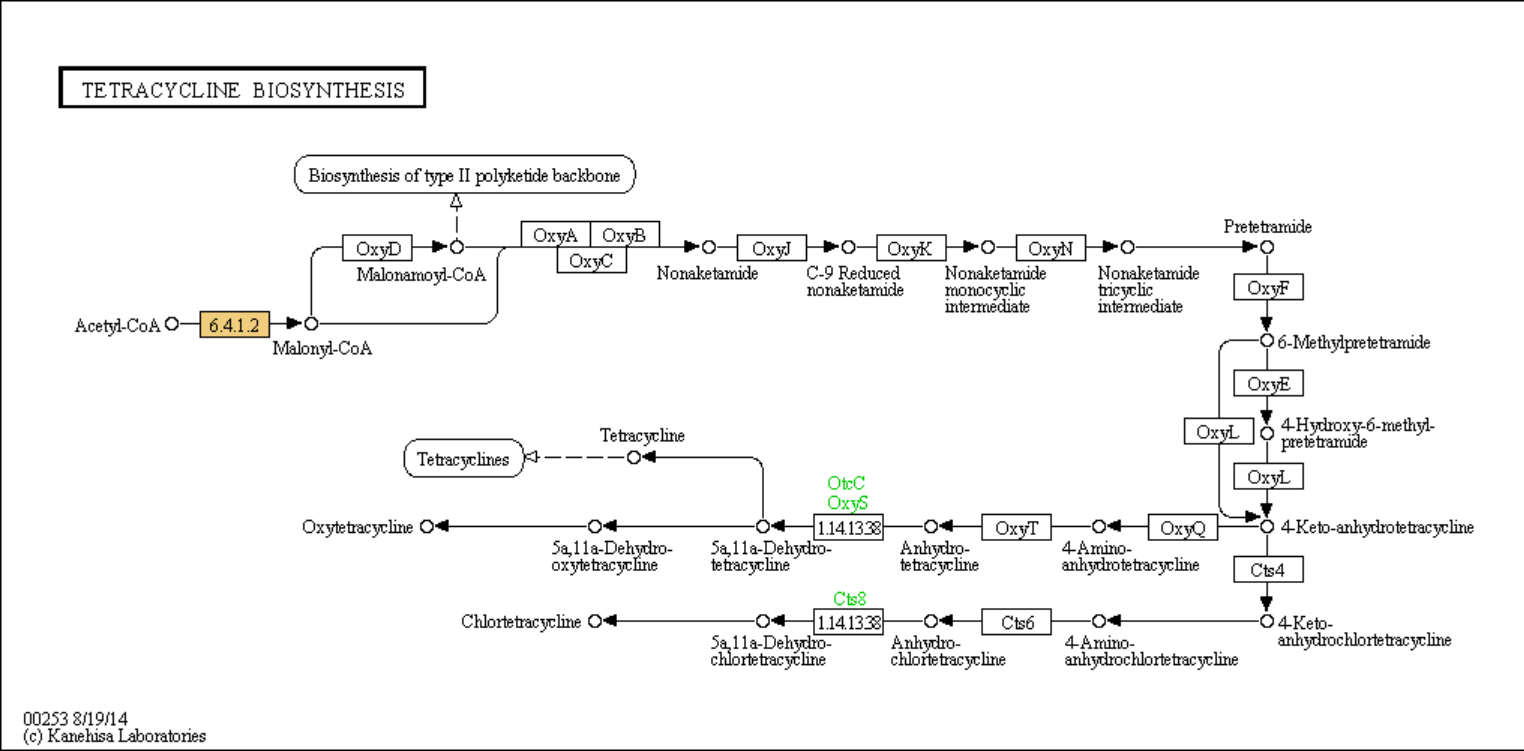

00253 8/19/14  
(c) Kanehisa Laboratories

**Image S1-image map00253.** Enzyme codes (EC) in Supplemental Table S4 are highlighted with different colors (one color for each EC) in the KEGG (Kanehisa et al., 2016) map using the Blast2GO online service (<https://www.blast2go.com>).

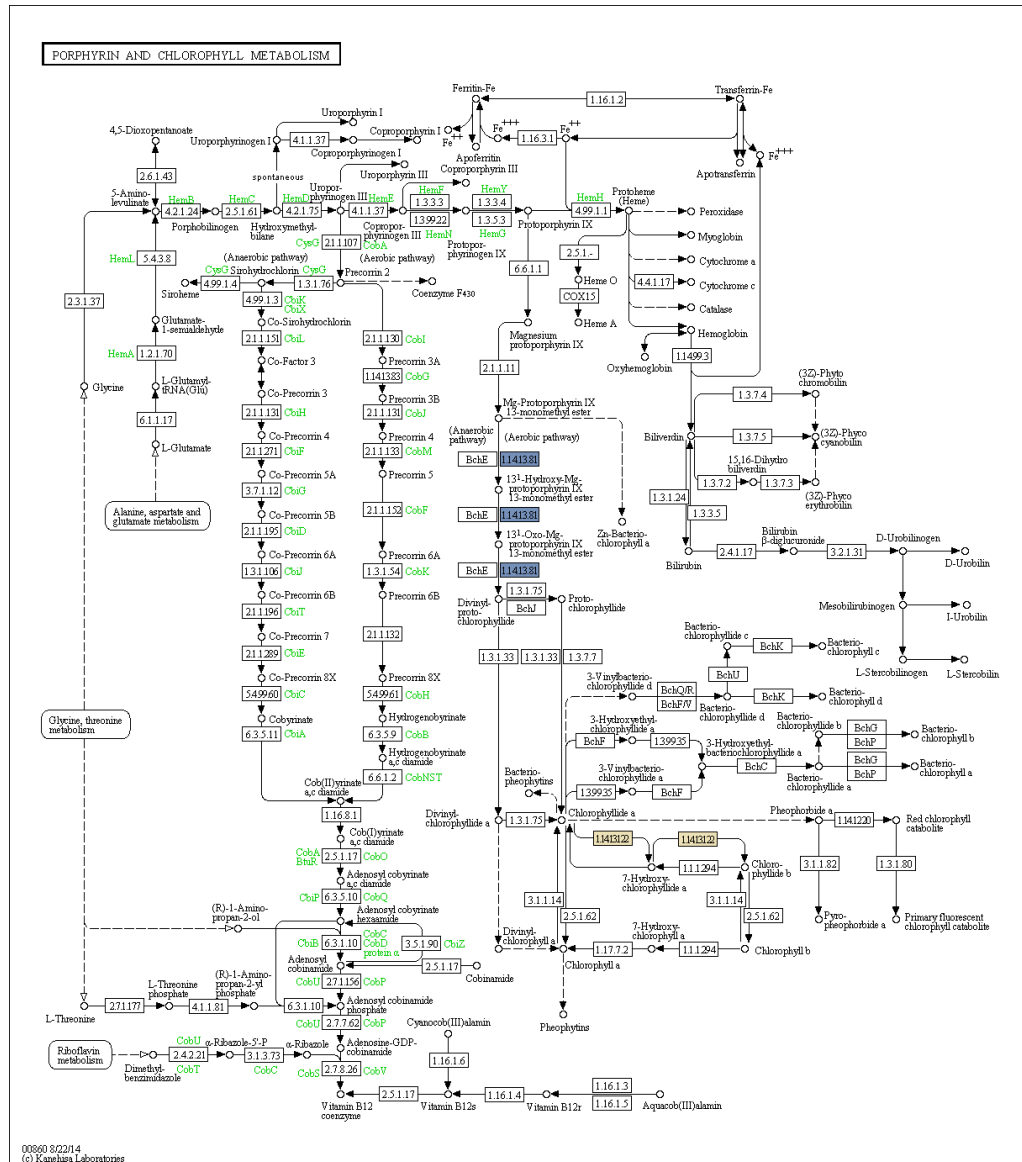

**Image S1-image map00860.** Enzyme codes (EC) in Supplemental Table S4 are highlighted with different colors (one color for each EC) in the KEGG (Kanehisa et al., 2016) map using the Blast2GO online service (<https://www.blast2go.com>).

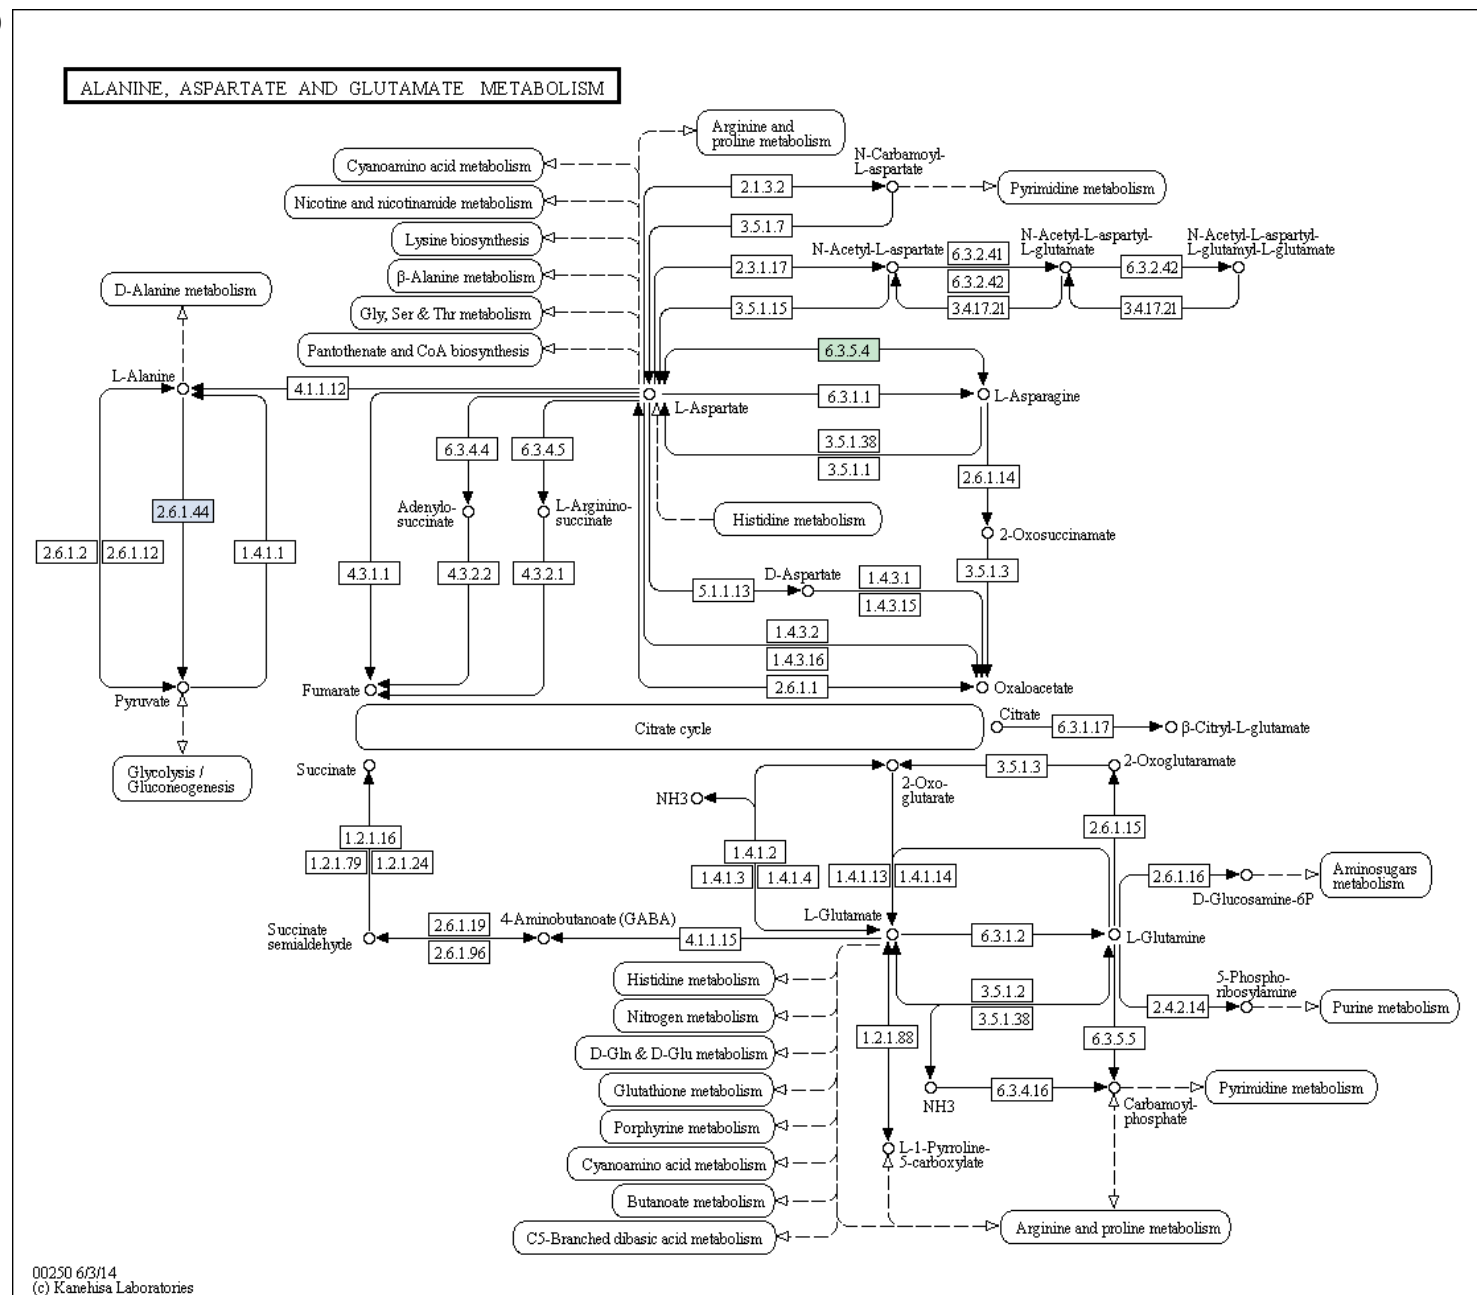

**Image S1-image map00250.** Enzyme codes (EC) in Supplemental Table S4 are highlighted with different colors (one color for each EC) in the KEGG (Kanehisa et al., 2016) map using the Blast2GO online service (<https://www.blast2go.com>).

00281 12/9/13  
(c) Kanehisa Laboratories

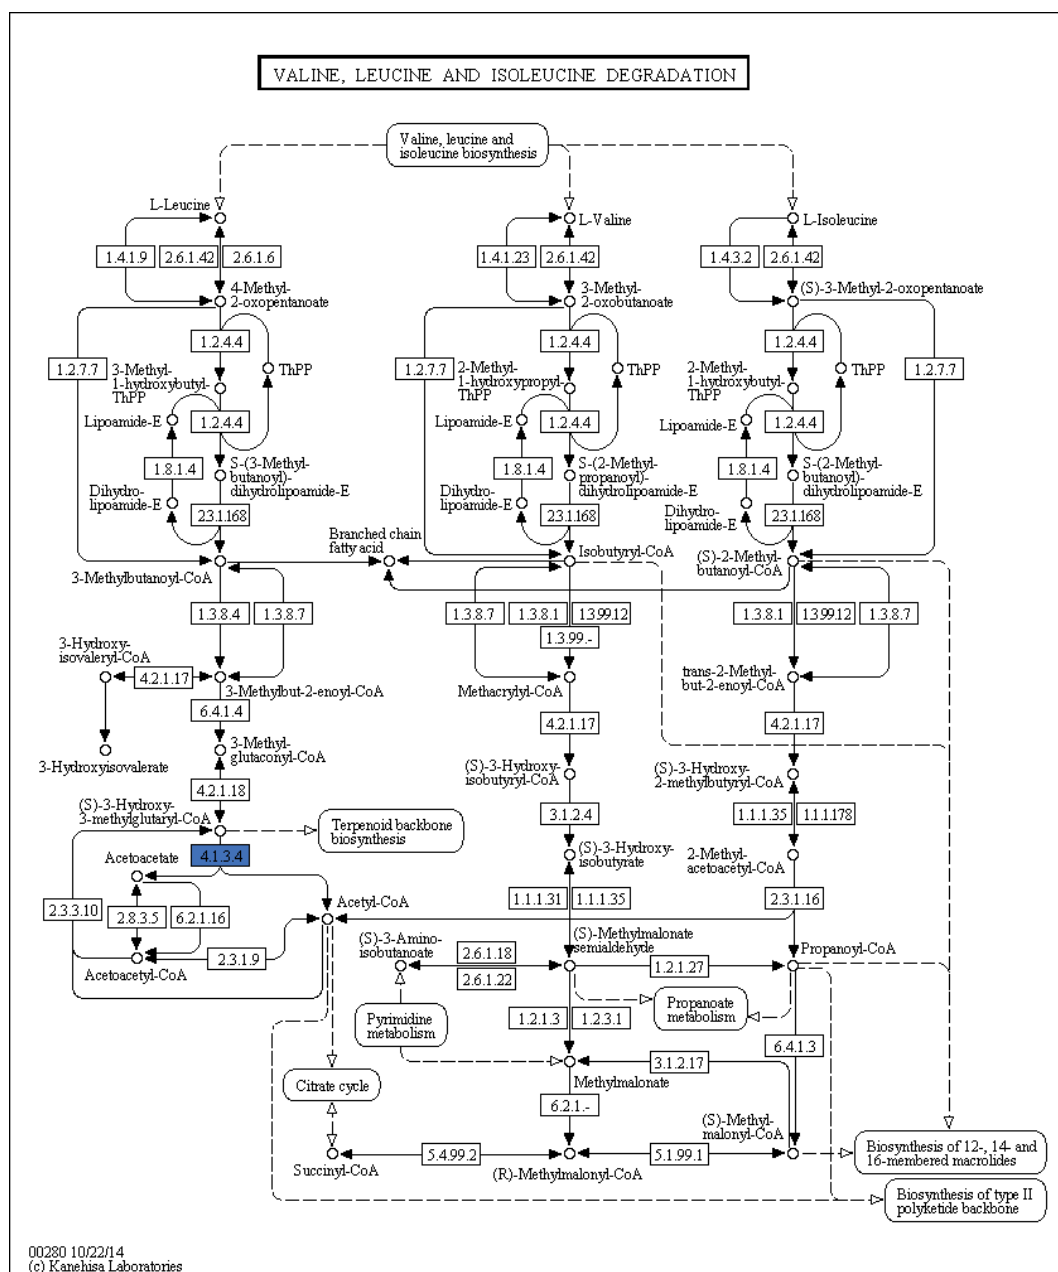

**Image S1-image map00280.** Enzyme codes (EC) in Supplemental Table S4 are highlighted with different colors (one color for each EC) in the KEGG (Kanehisa et al., 2016) map using the Blast2GO online service (<https://www.blast2go.com>).

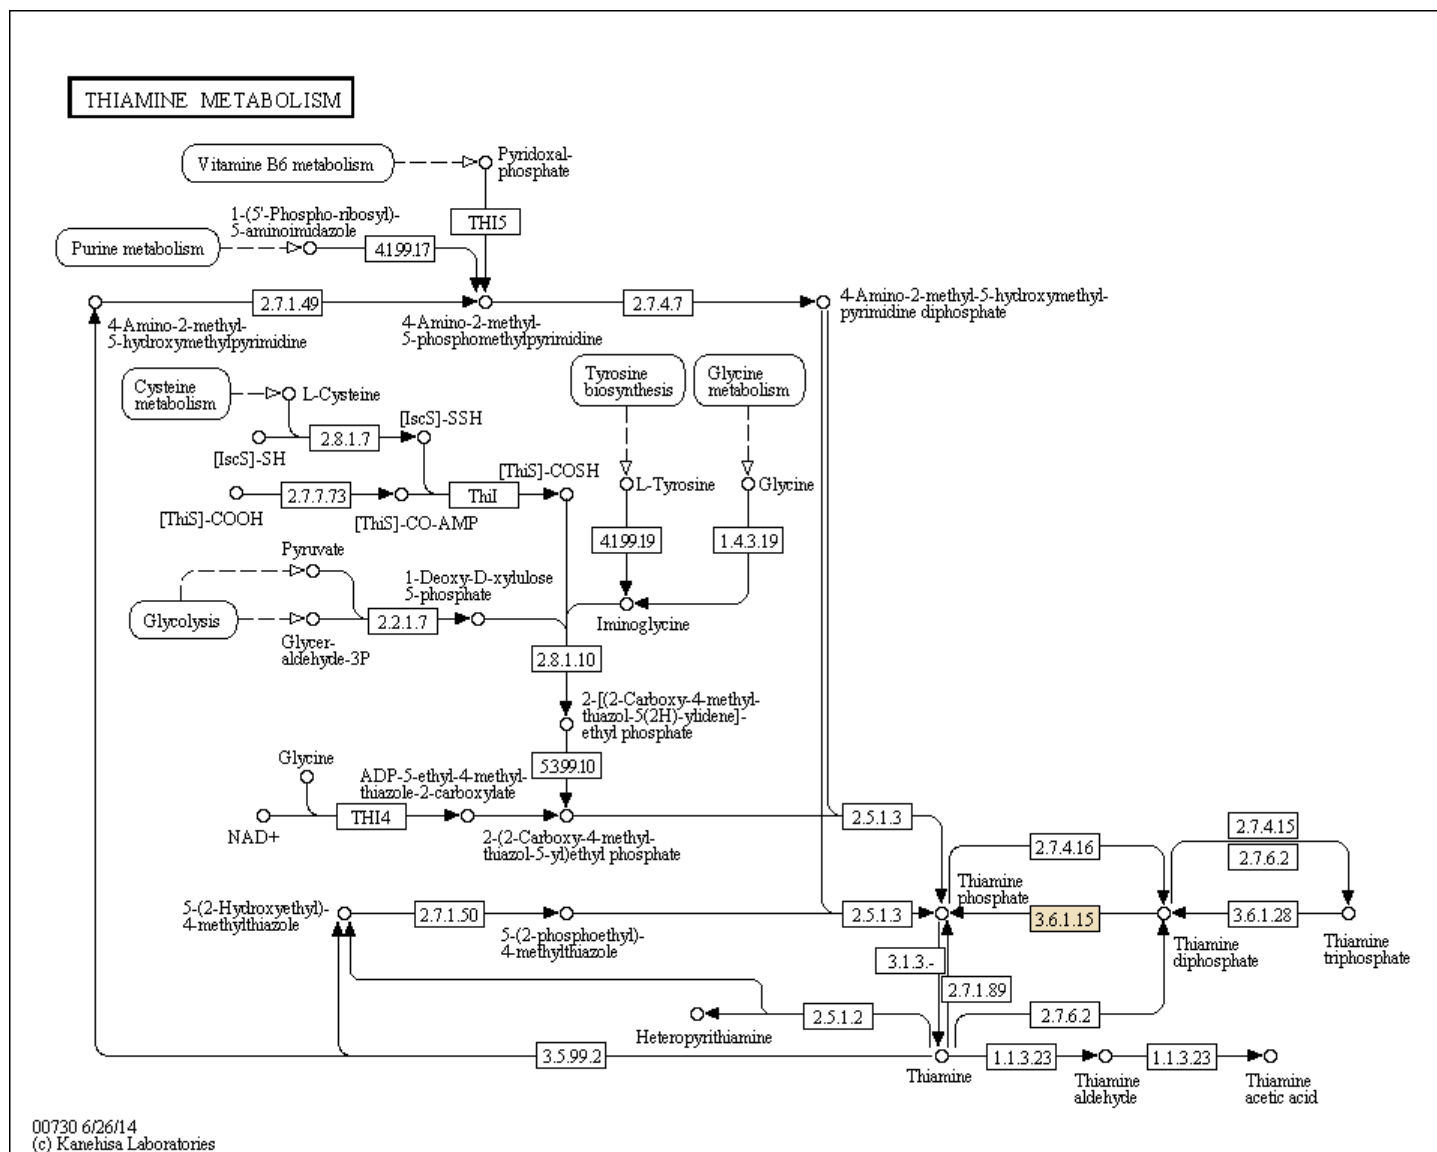

**Image S1-image map00730.** Enzyme codes (EC) in Supplemental Table S4 are highlighted with different colors (one color for each EC) in the KEGG (Kanehisa et al., 2016) map using the Blast2GO online service (<https://www.blast2go.com>).

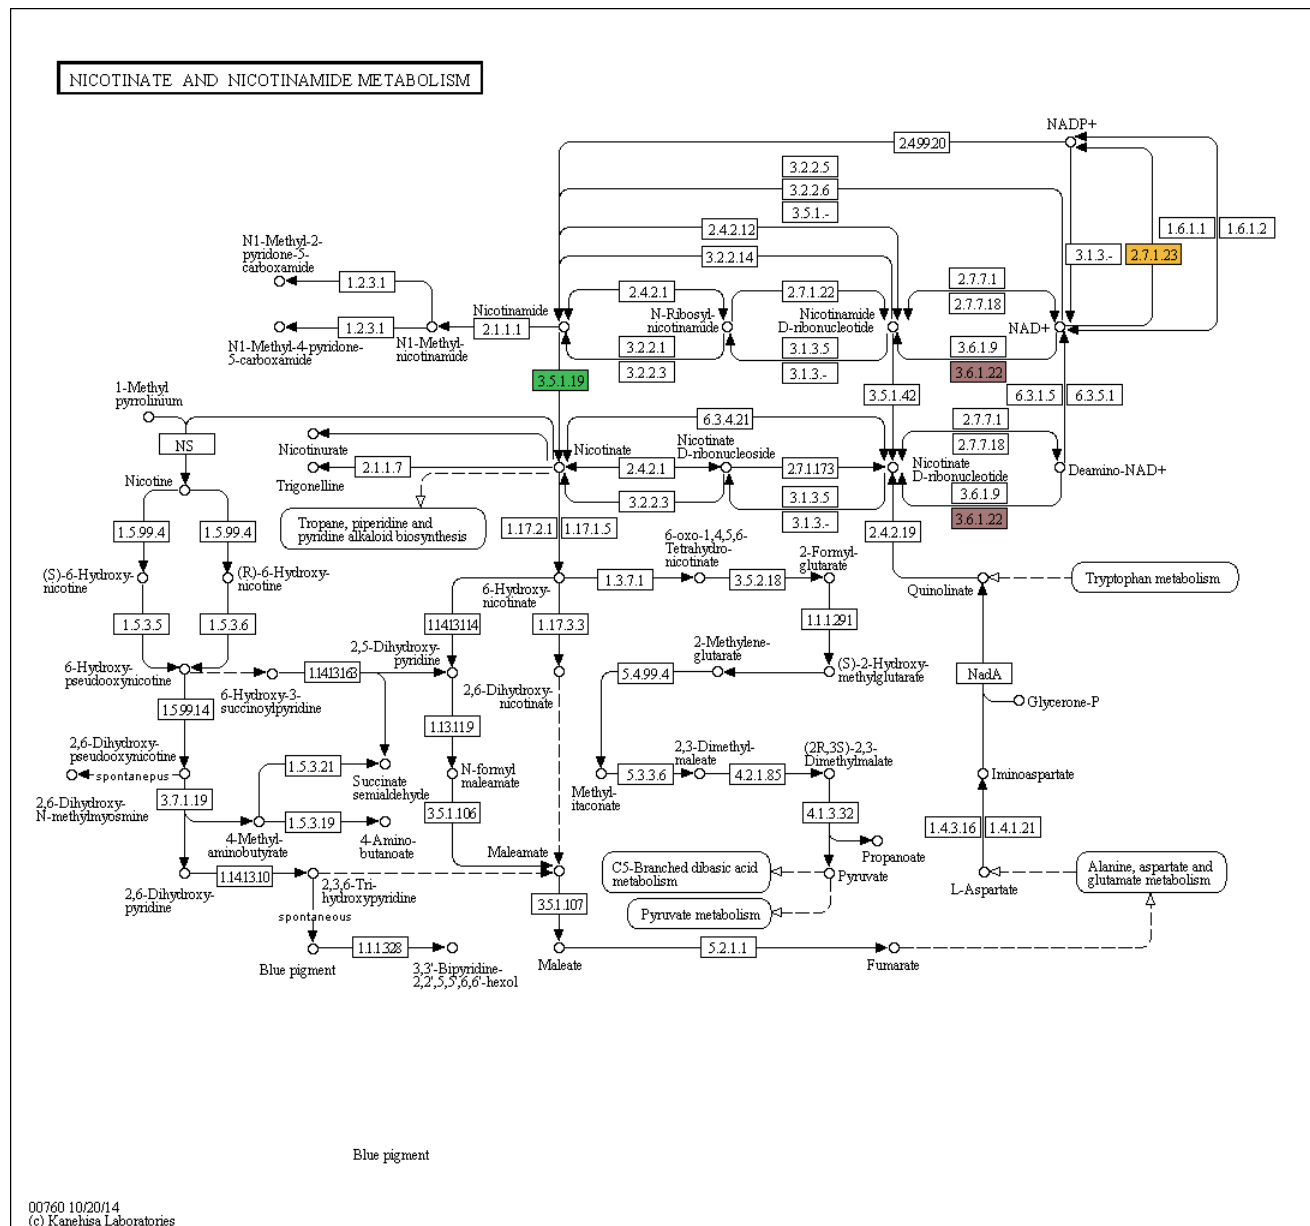

**Image S1-image map00760.** Enzyme codes (EC) in Supplemental Table S4 are highlighted with different colors (one color for each EC) in the KEGG (Kanehisa et al., 2016) map using the Blast2GO online service (<https://www.blast2go.com>).

**ge map00604.** Enzyme codes (EC) in Supplemental Table S4 are highlighted with different colors (one color for each EC) in nehisa et al., 2016) map using the Blast2GO online service (<https://www.blast2go.com>).

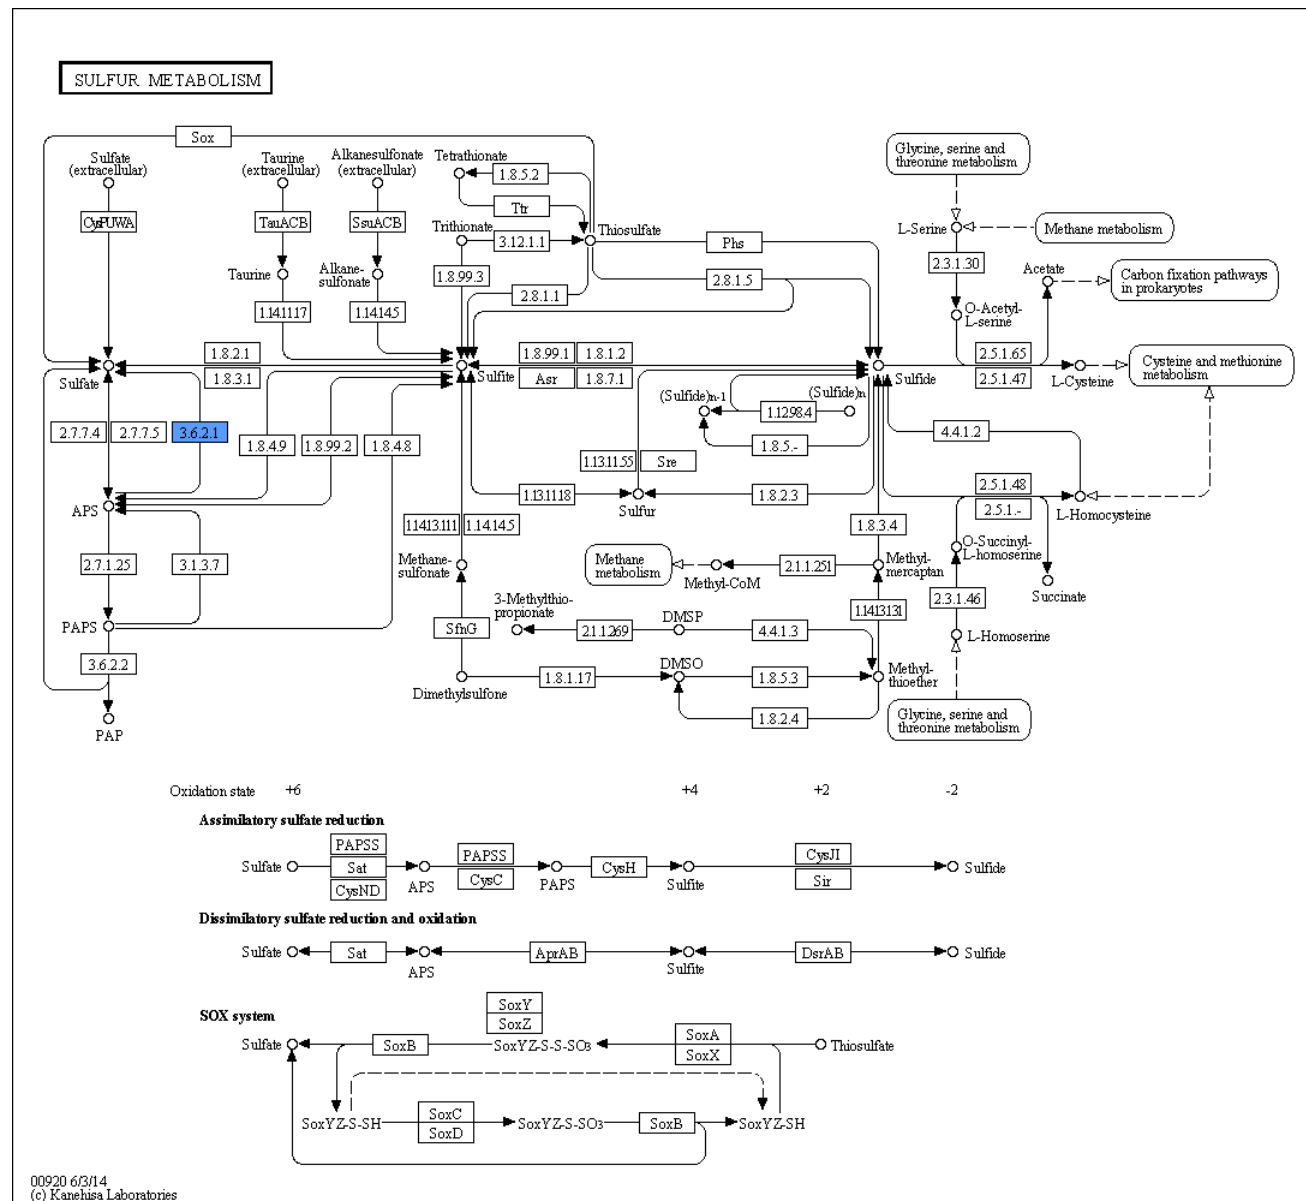

**Image S1-image map00920.** Enzyme codes (EC) in Supplemental Table S4 are highlighted with different colors (one color for each EC) in the KEGG (Kanehisa et al., 2016) map using the Blast2GO online service (<https://www.blast2go.com>).

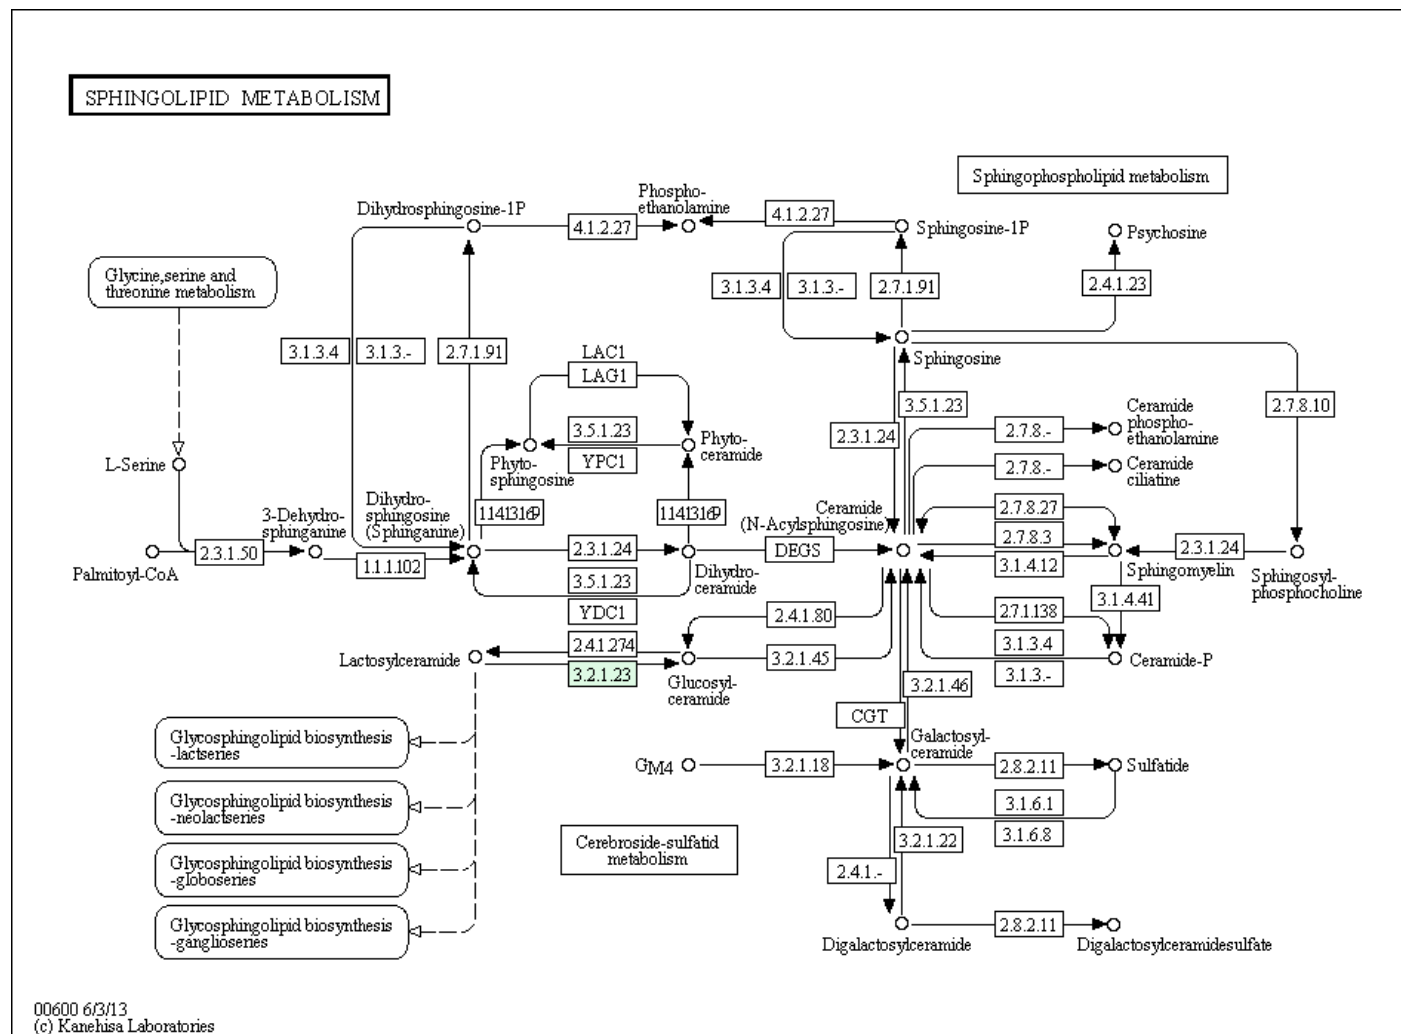

**Image S1-image map00600.** Enzyme codes (EC) in Supplemental Table S4 are highlighted with different colors (one color for each EC) in the KEGG (Kanehisa et al., 2016) map using the Blast2GO online service (<https://www.blast2go.com>).

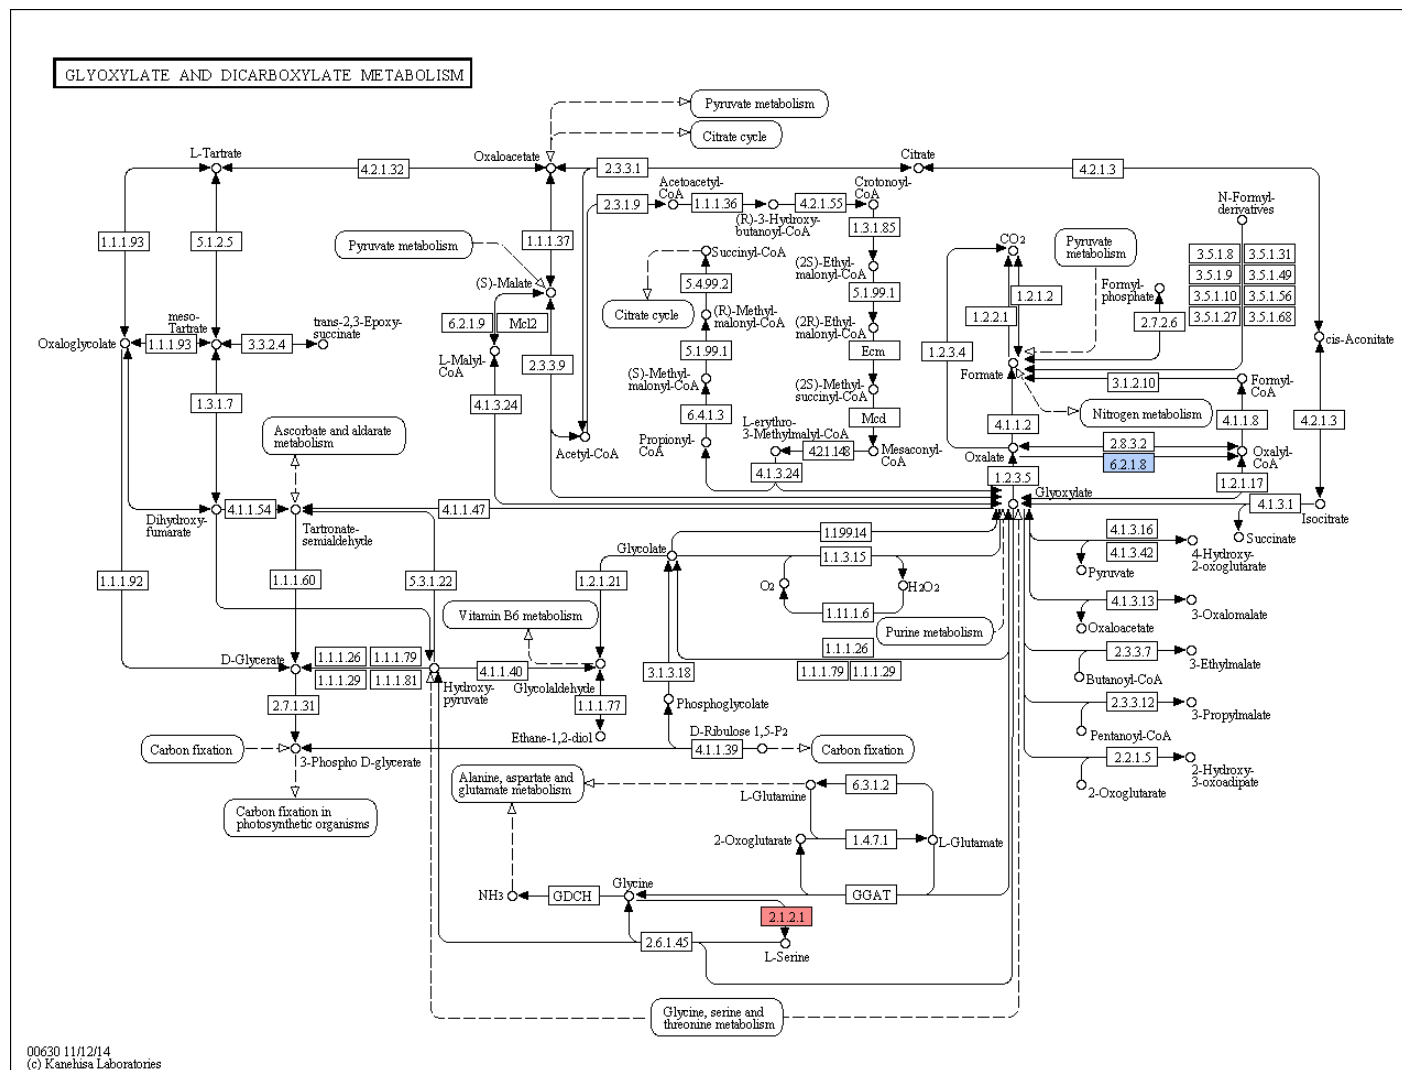

**Image S1-image map00630.** Enzyme codes (EC) in Supplemental Table S4 are highlighted with different colors (one color for each EC) in the KEGG (Kanehisa et al., 2016) map using the Blast2GO online service (<https://www.blast2go.com>).

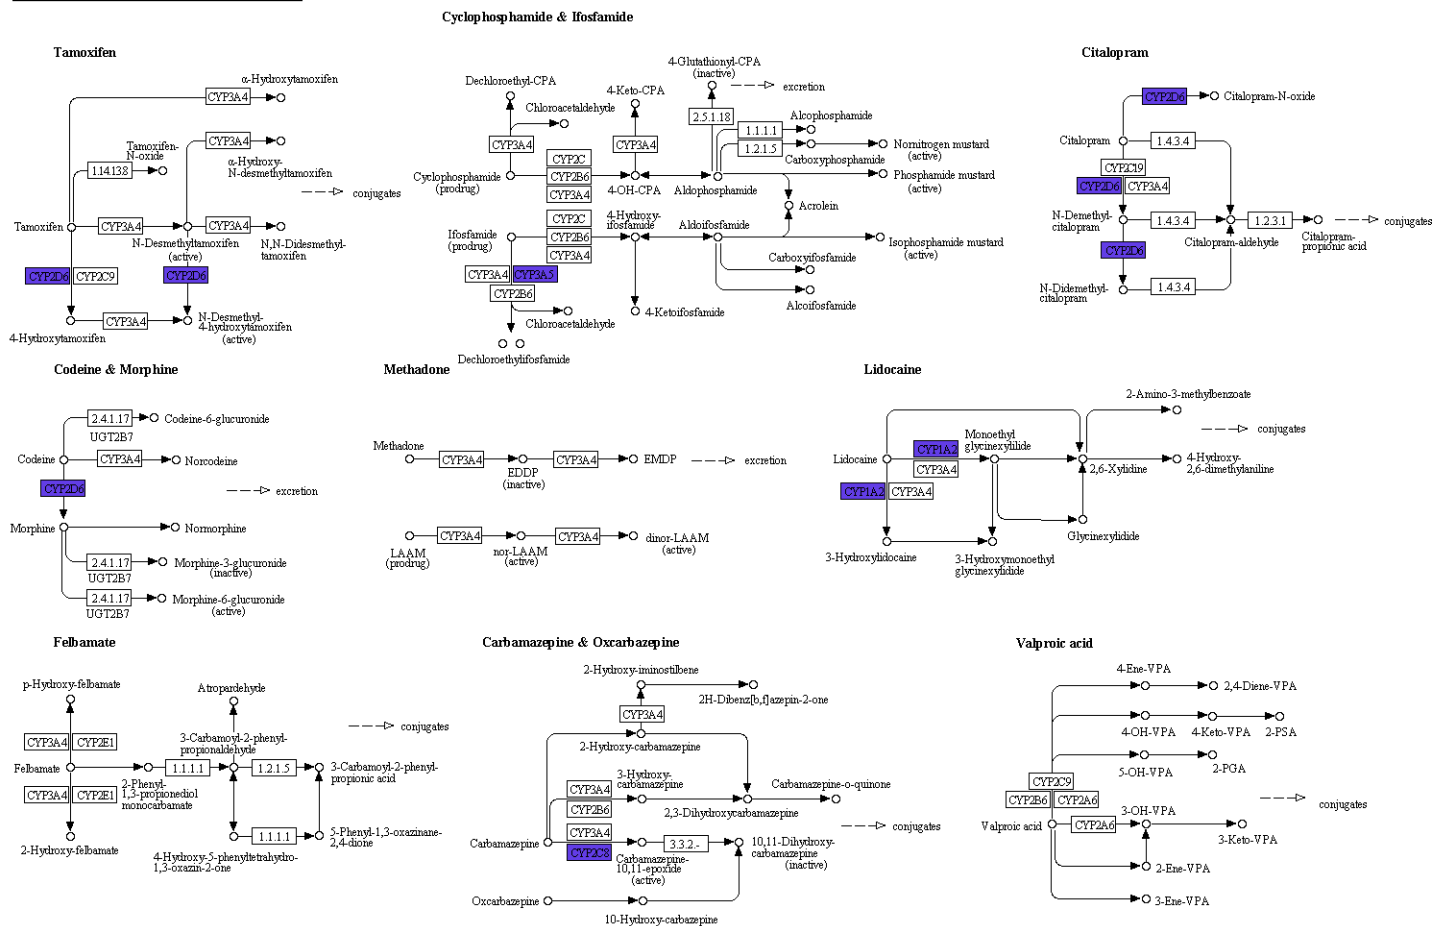

00982 11/11/13  
(c) Kanehisa Laboratories

**Image S1-image map00982.** Enzyme codes (EC) in Supplemental Table S4 are highlighted with different colors (one color for each EC) in the KEGG (Kanehisa et al., 2016) map using the Blast2GO online service (<https://www.blast2go.com>).

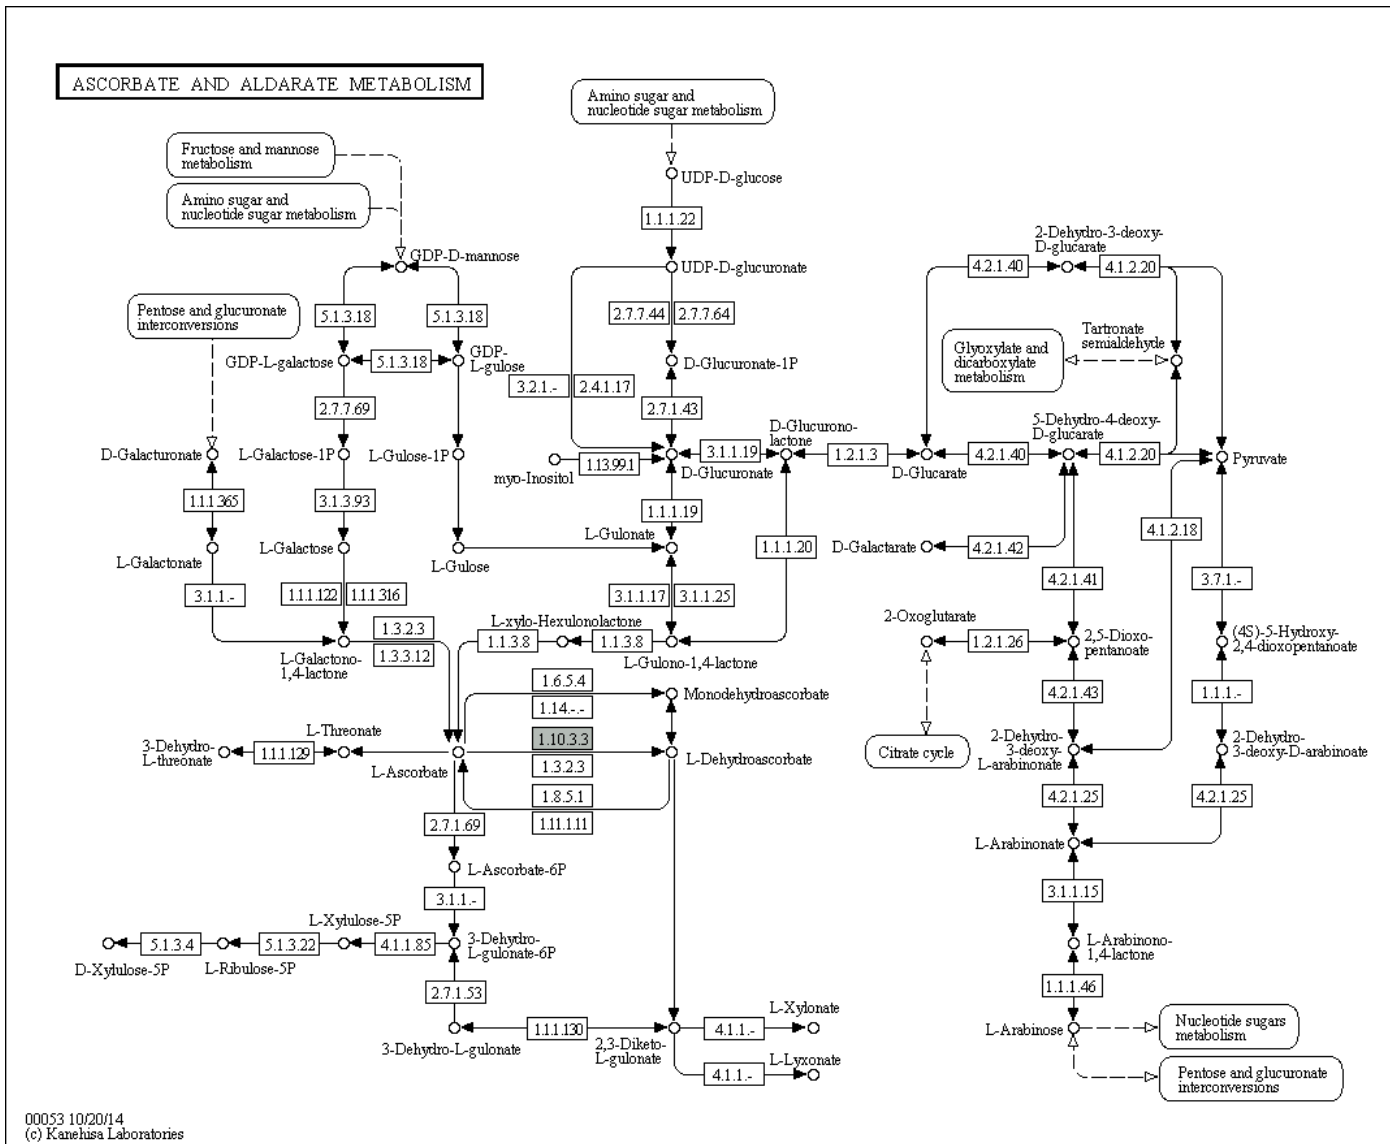

**Image S1-image map00053.** Enzyme codes (EC) in Supplemental Table S4 are highlighted with different colors (one color for each EC) in the KEGG (Kanehisa et al., 2016) map using the Blast2GO online service (<https://www.blast2go.com>).

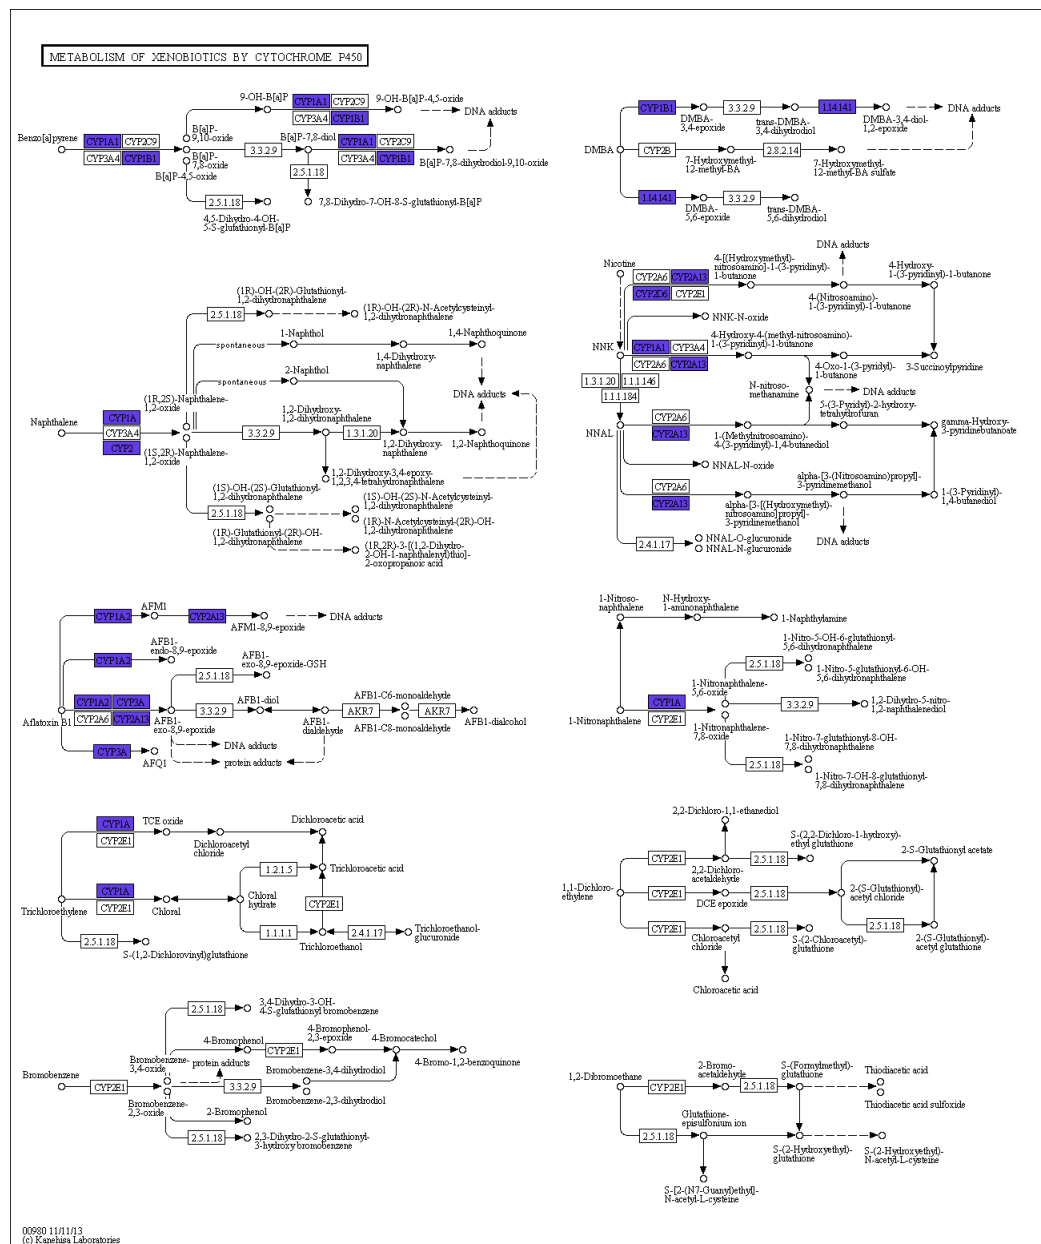

**Image S1-image map00980.** Enzyme codes (EC) in Supplemental Table S4 are highlighted with different colors (one color for each EC) in the KEGG (Kanehisa et al., 2016) map using the Blast2GO online service (<https://www.blast2go.com>).

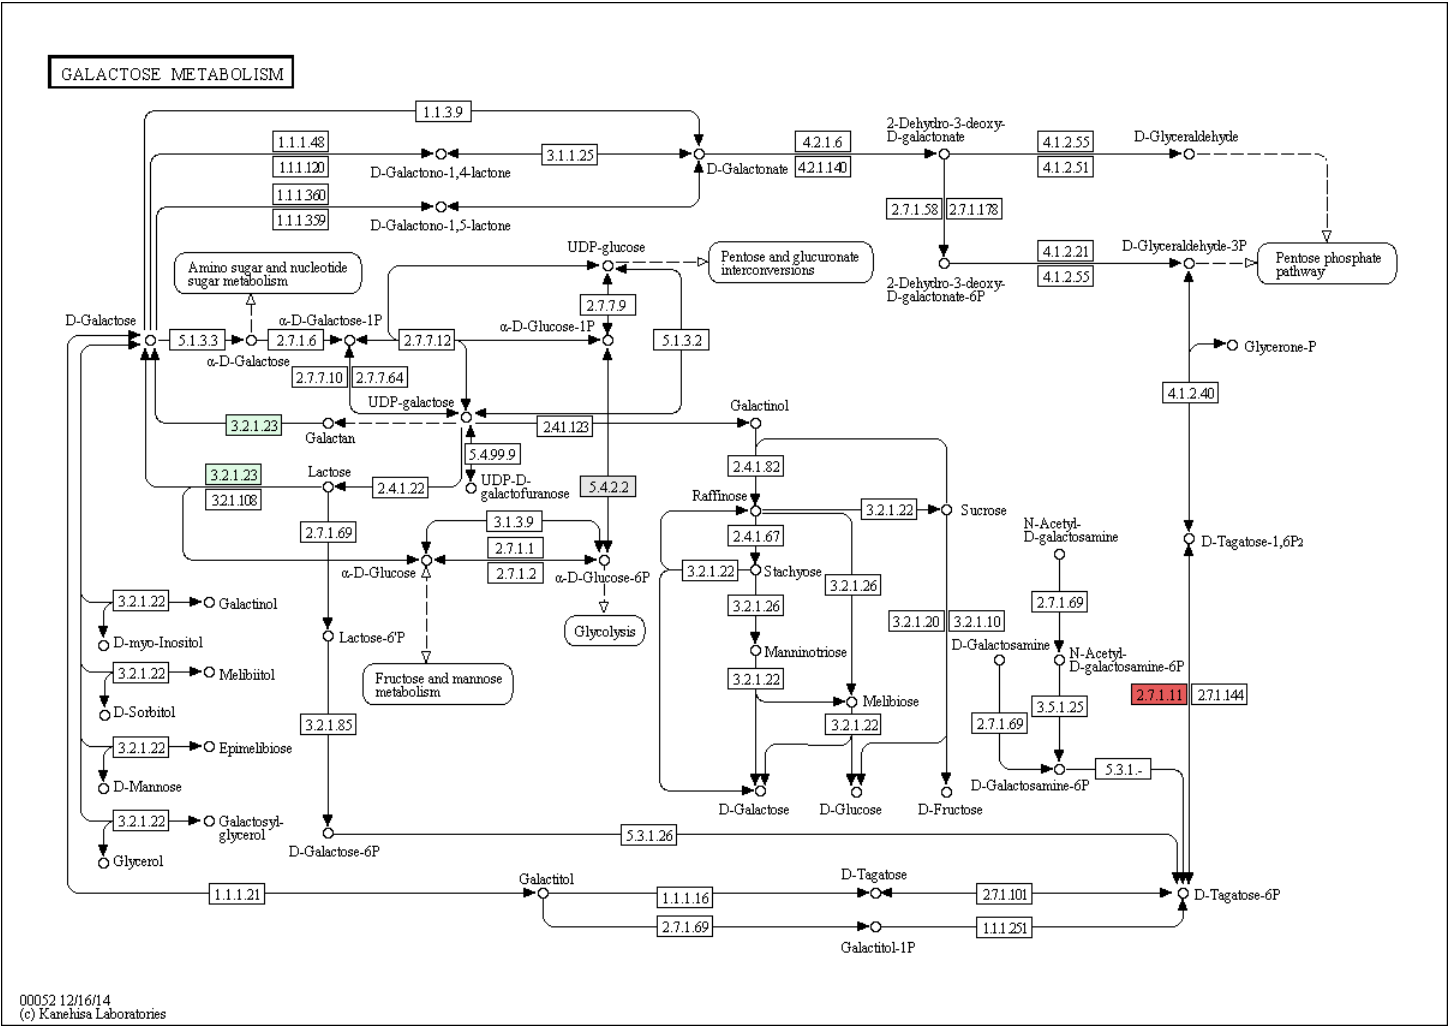

**Image S1-image map00052.** Enzyme codes (EC) in Supplemental Table S4 are highlighted with different colors (one color for each EC) in the KEGG (Kanehisa et al., 2016) map using the Blast2GO online service (<https://www.blast2go.com>).



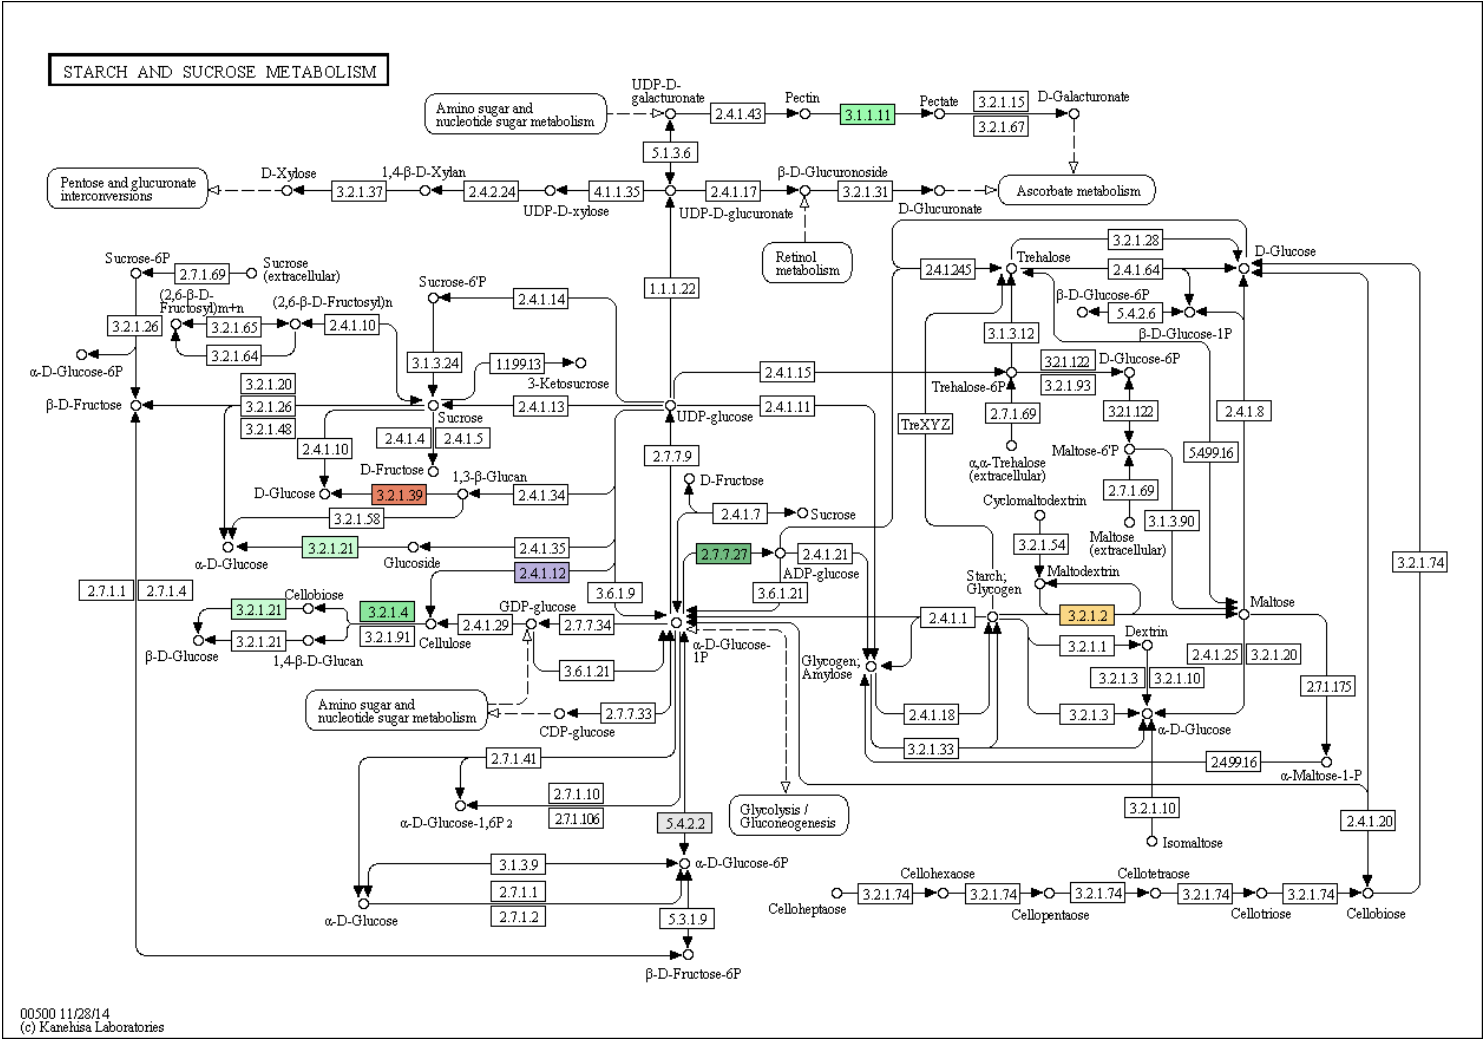

**Image S1-image map00500.** Enzyme codes (EC) in Supplemental Table S4 are highlighted with different colors (one color for each EC) in the KEGG (Kanehisa et al., 2016) map using the Blast2GO online service (<https://www.blast2go.com>).

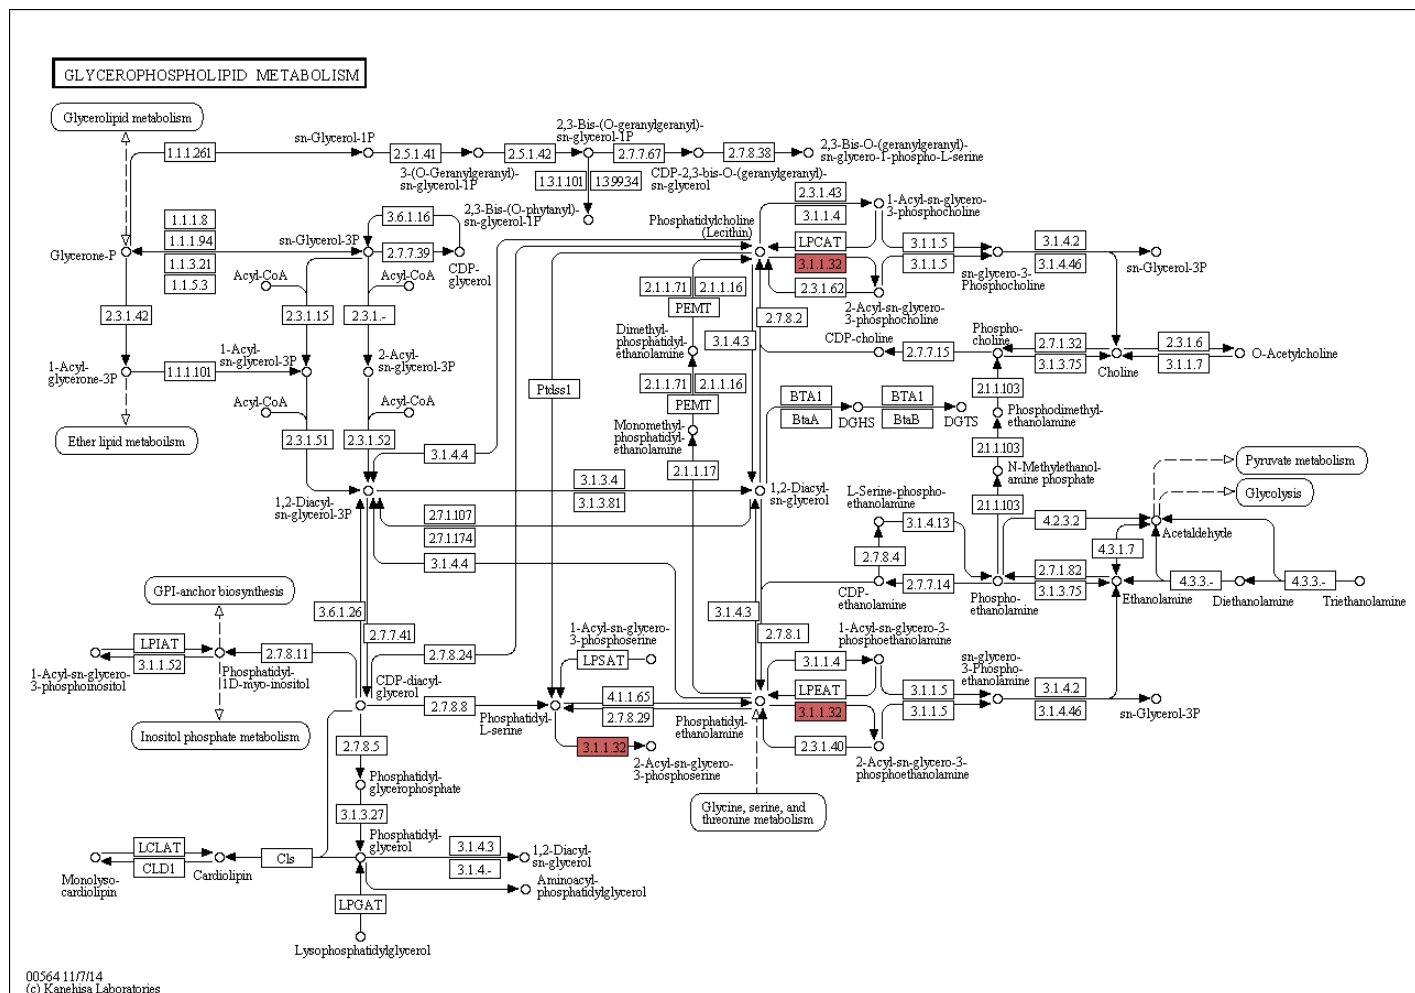

**Image S1-image map00564.** Enzyme codes (EC) in Supplemental Table S4 are highlighted with different colors (one color for each EC) in the KEGG (Kanehisa et al., 2016) map using the Blast2GO online service (<https://www.blast2go.com>).

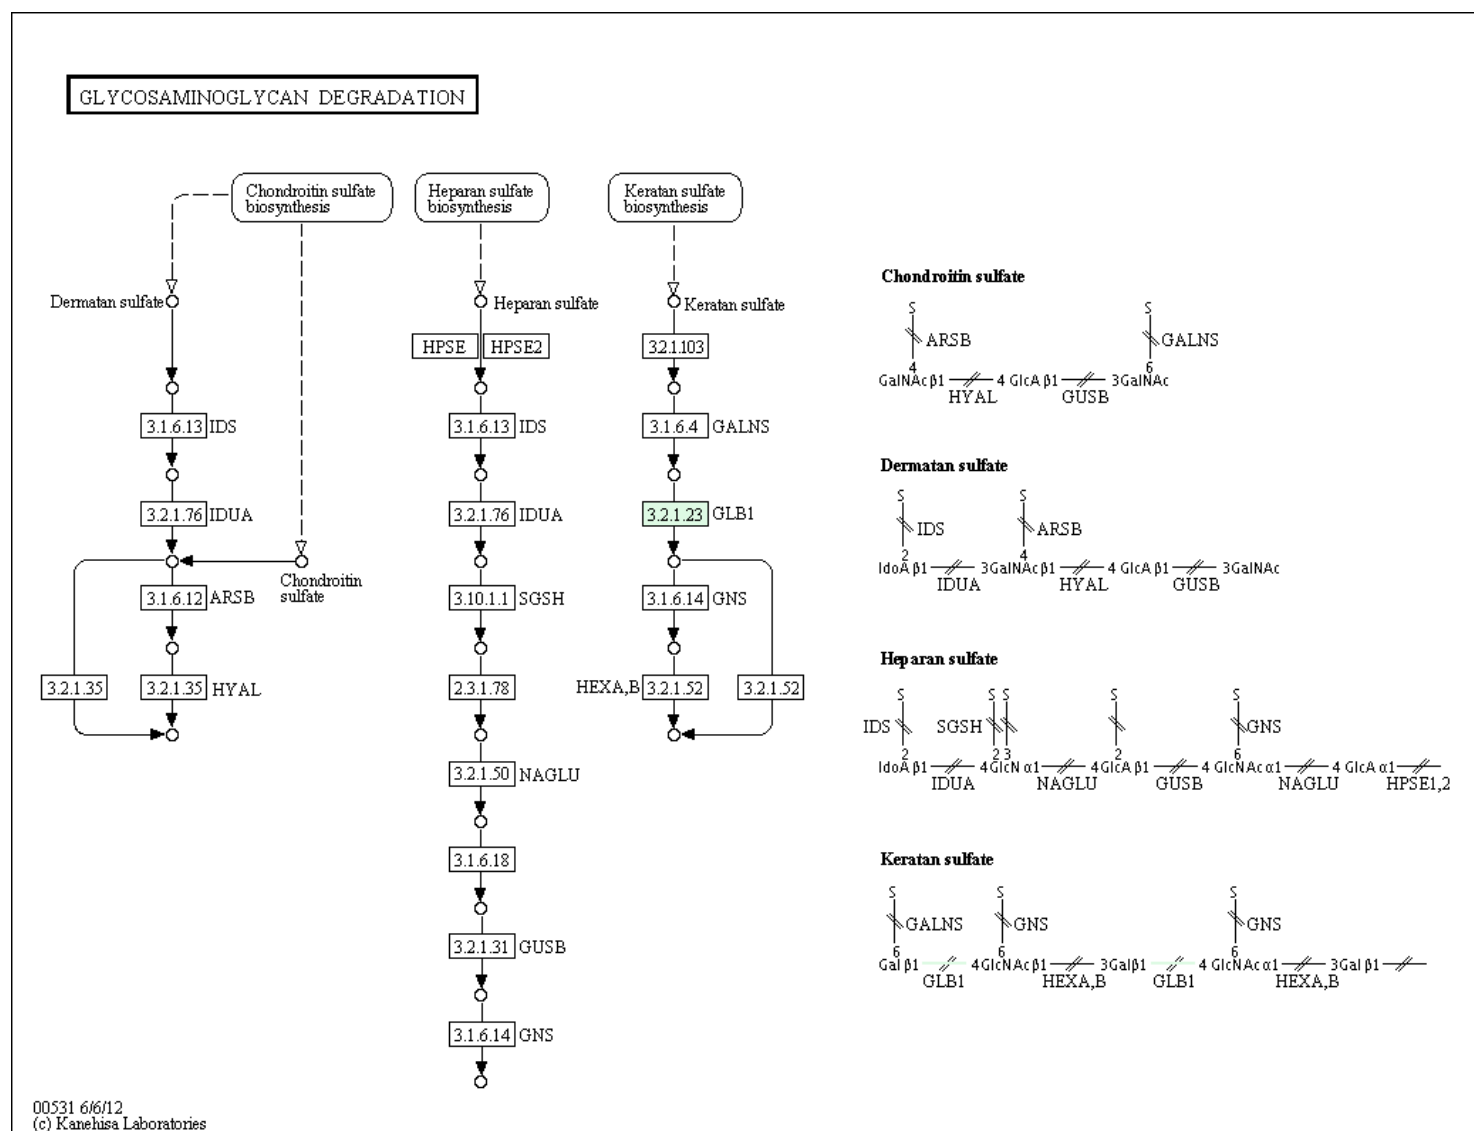

**Image S1-image map00531.** Enzyme codes (EC) in Supplemental Table S4 are highlighted with different colors (one color for each EC) in the KEGG (Kanehisa et al., 2016) map using the Blast2GO online service (<https://www.blast2go.com>).

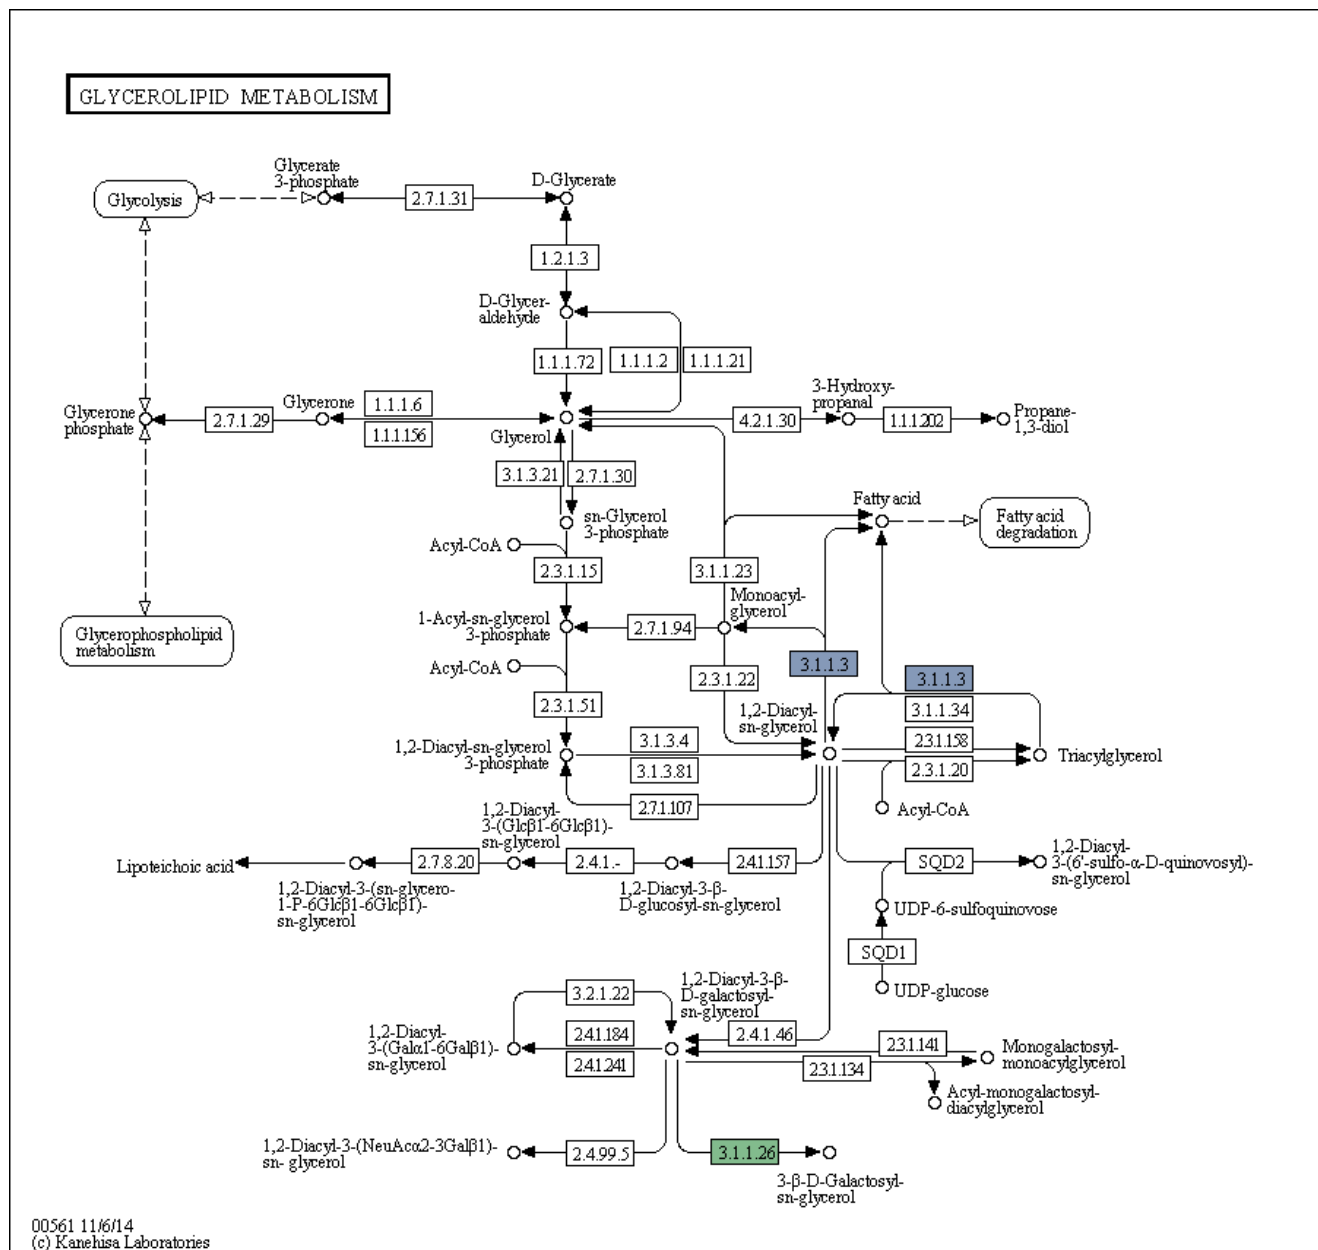

**Image S1-image map00561.** Enzyme codes (EC) in Supplemental Table S4 are highlighted with different colors (one color for each EC) in the KEGG (Kanehisa et al., 2016) map using the Blast2GO online service (<https://www.blast2go.com>).

[illegible]

**Image S1-image map00240.** Enzyme codes (EC) in Supplemental Table S4 are highlighted with different colors (one color for each EC) in the KEGG (Kanehisa et al., 2016) map using the Blast2GO online service (<https://www.blast2go.com>).

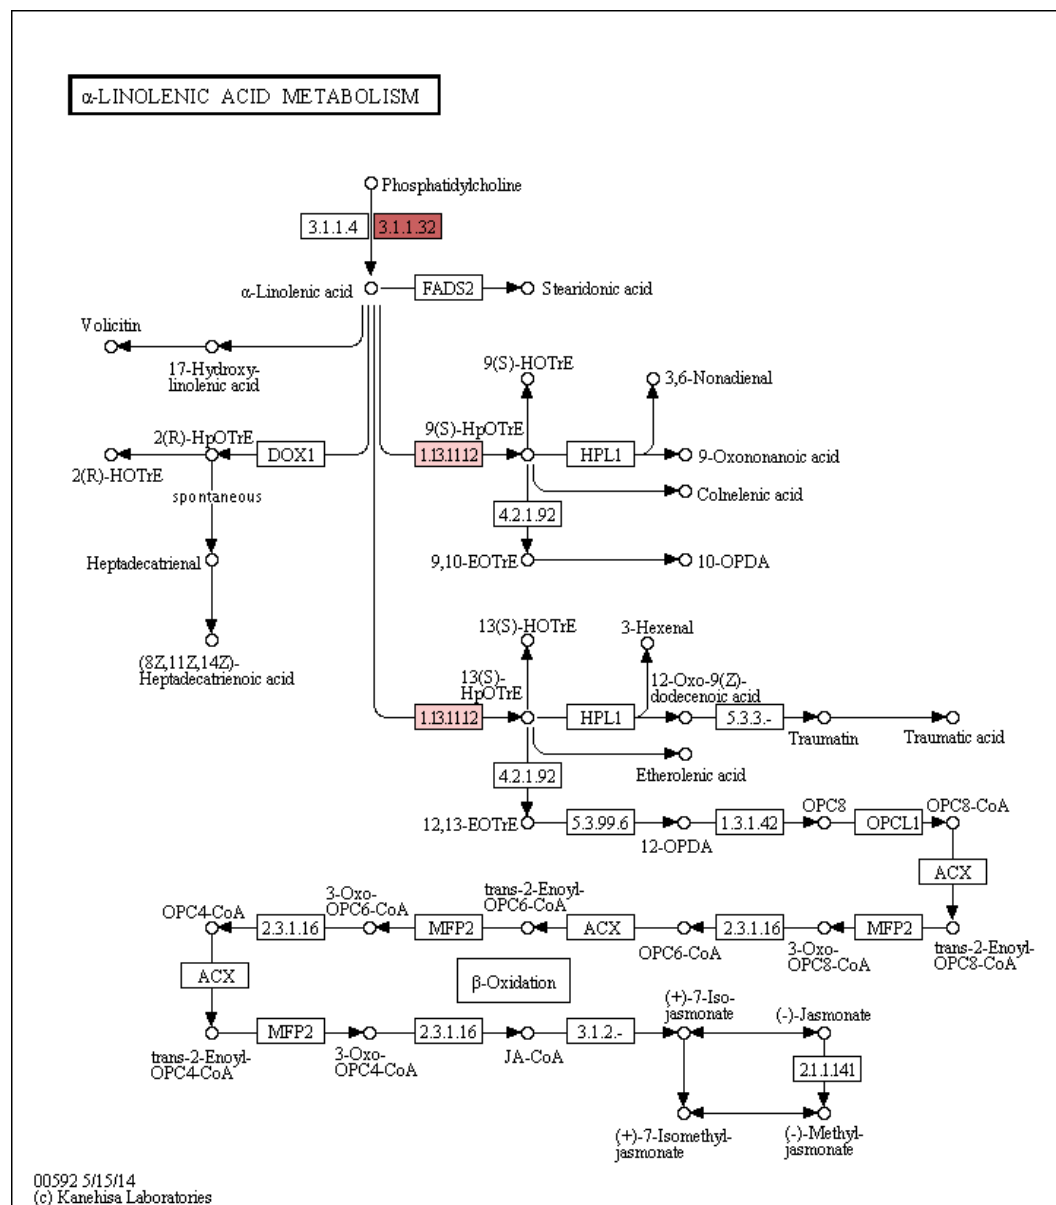

**Image S1-image map00592.** Enzyme codes (EC) in Supplemental Table S4 are highlighted with different colors (one color for each EC) in the KEGG (Kanehisa et al., 2016) map using the Blast2GO online service (<https://www.blast2go.com>).

Ima. S1-image map00591

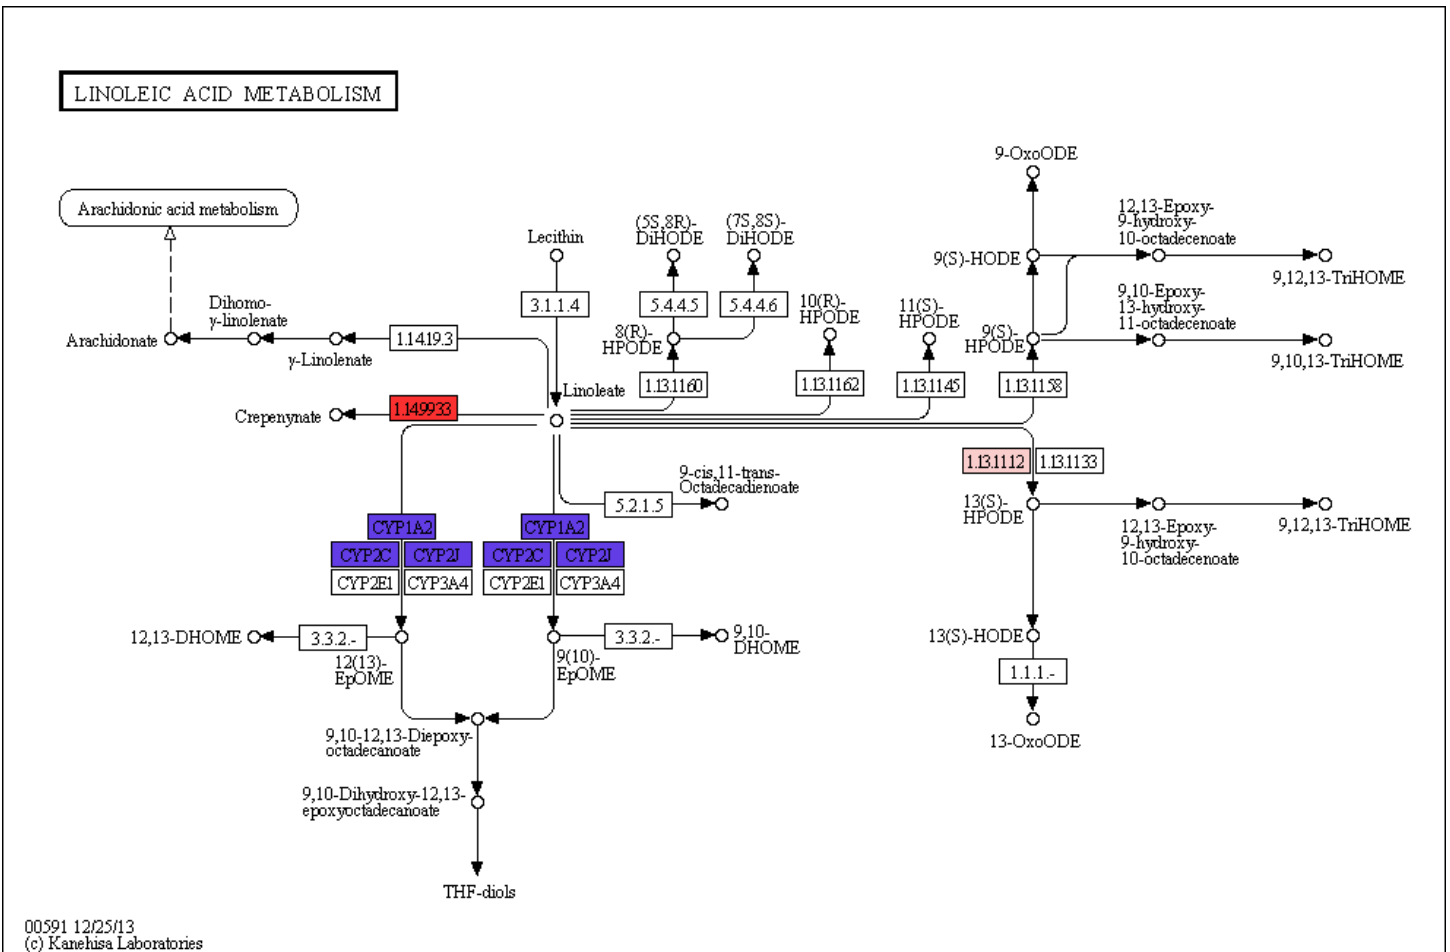

**Image S1-image map00591.** Enzyme codes (EC) in Supplemental Table S4 are highlighted with different colors (one color for each EC) in the KEGG (Kanehisa et al., 2016) map using the Blast2GO online service (<https://www.blast2go.com>).

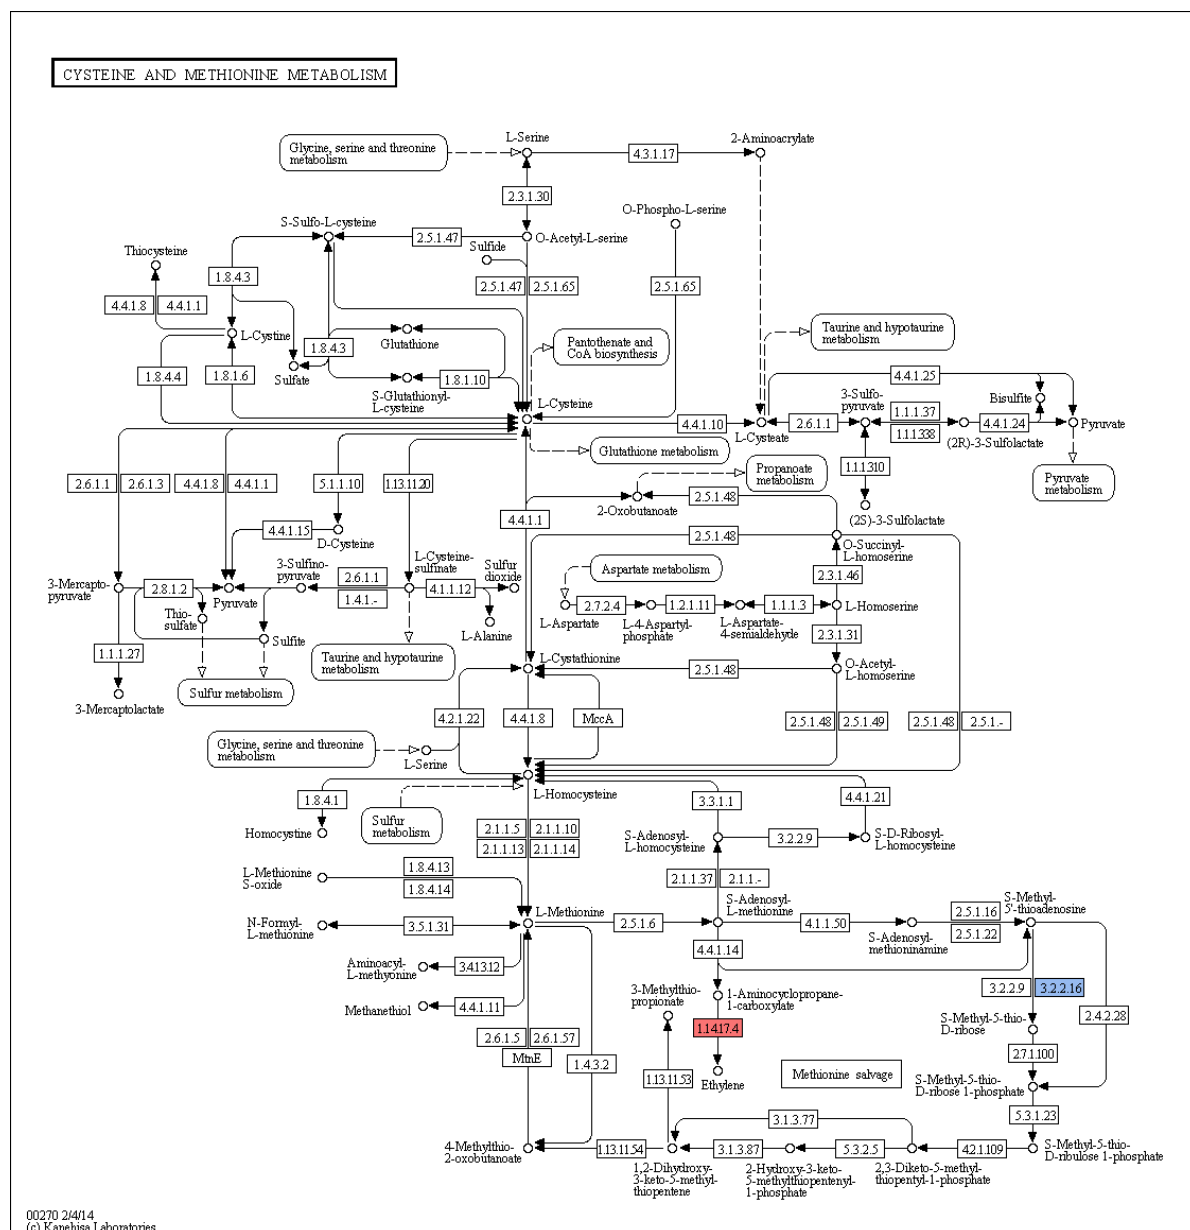

**Image S1-image map00270.** Enzyme codes (EC) in Supplemental Table S4 are highlighted with different colors (one color for each EC) in the KEGG (Kanehisa et al., 2016) map using the Blast2GO online service (<https://www.blast2go.com>).

Ima. S1-image map00590

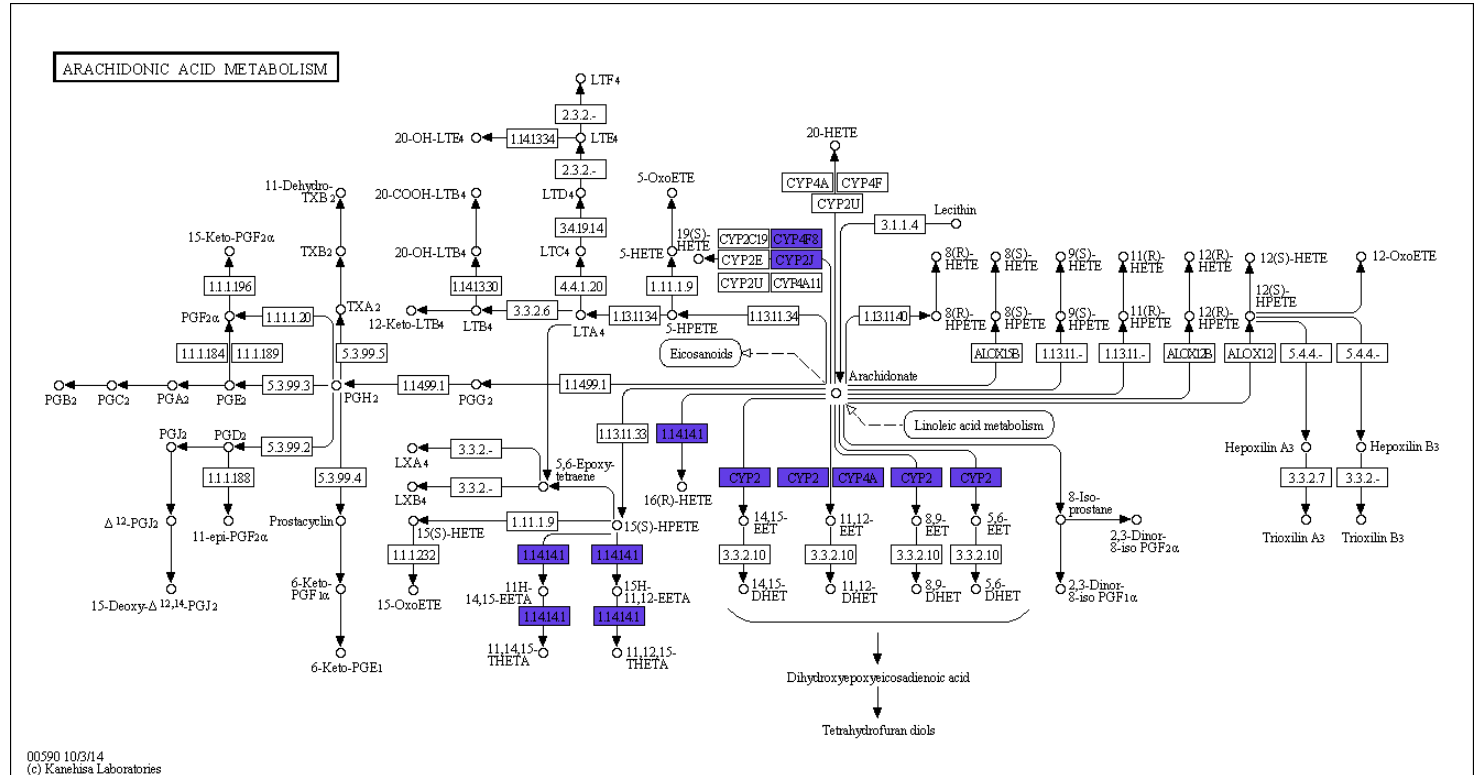

**Image S1-image map00590.** Enzyme codes (EC) in Supplemental Table S4 are highlighted with different colors (one color for each EC) in the KEGG (Kanehisa et al., 2016) map using the Blast2GO online service (<https://www.blast2go.com>).



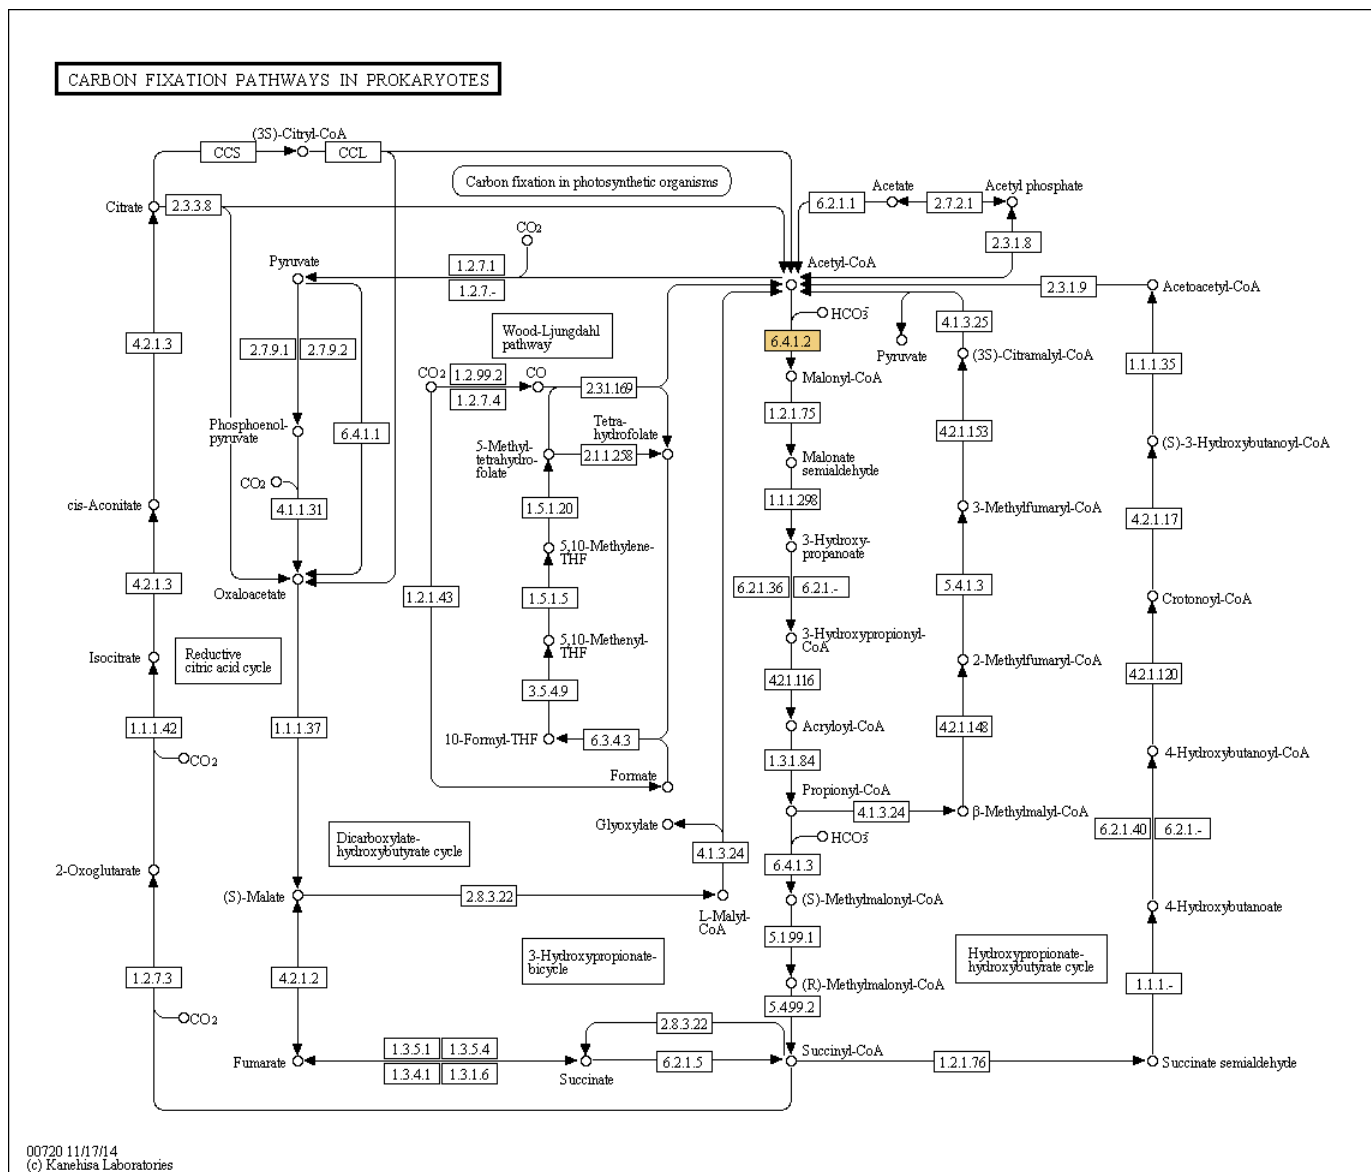

**Image S1-image map00720.** Enzyme codes (EC) in Supplemental Table S4 are highlighted with different colors (one color for each EC) in the KEGG (Kanehisa et al., 2016) map using the Blast2GO online service (<https://www.blast2go.com>).

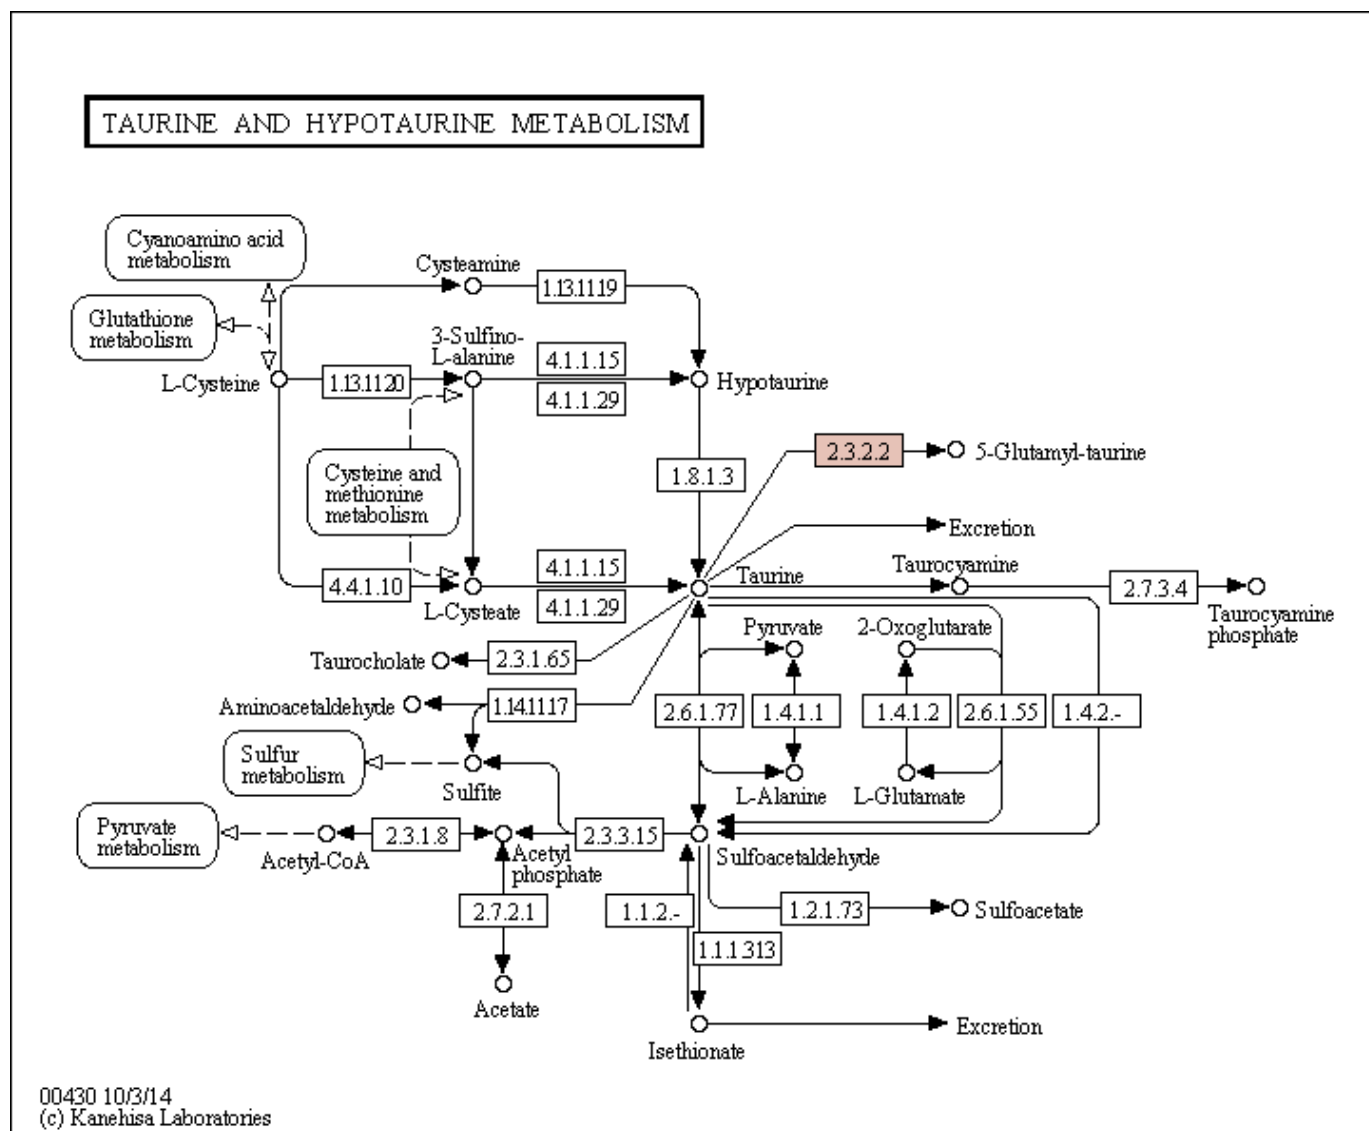

**Image S1-image map00430.** Enzyme codes (EC) in Supplemental Table S4 are highlighted with different colors (one color for each EC) in the KEGG (Kanehisa et al., 2016) map using the Blast2GO online service (<https://www.blast2go.com>).
