# Supplementary material
Source: publisher figshare collection journal article supplement (https://tandf.figshare.com/articles/dataset/_/5633755)
Supplement: Supplementary file 2 [file 2 › tssp_a_1403842_sm9074.pdf]

**Fig. S3**

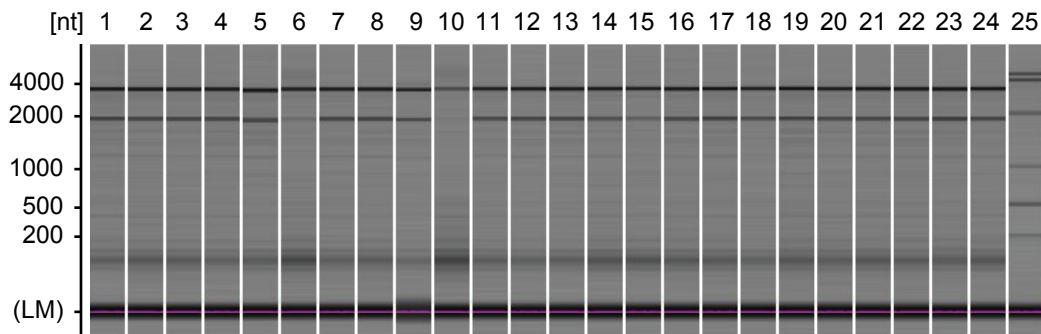

**Figure S3.** Total RNA quality confirmation of all the 24 samples using electrophoresis apparatus MultiNA. The far-right lane 25 is a size marker, and the rest of the lanes are samples. The sample in lane 10, in which two bands are not seen, was used only to confirm a peak in the apparatus.

Lane 1: W (+) d0-1

Lane 2: W (+) d0-2

Lane 3: W (+) d0-3

Lane 4: N (+) d0-1

Lane 5: N (+) d0-2

Lane 6: N (+) d0-3

Lane 7: W (+) d2-1

Lane 8: W (+) d2-2

Lane 9: W (+) d2-3

Lane 10: N (+) d2-1

Lane 11: N (+) d2-2

Lane 12: N (+) d2-3

Lane 13: W (+) d4-1

Lane 14: W (+) d4-2

Lane 15: W (+) d4-3

Lane 16: N (+) d4-1

Lane 17: N (+) d4-2

Lane 18: N (+) d4-3

Lane 19: W (+) d5-1

Lane 20: W (+) d5-2

Lane 21: W (+) d5-3

Lane 22: N (+) d5-1

Lane 23: N (+) d5-2

Lane 24: N (+) d5-3

Lane 25: Marker

W: Williams 82

N: NOD1-3

(+): rhizobium inoculation

d0: 0 day

d2: 2 days

d4: 4 days

d5: 5 days
