# Supplementary material
Source: publisher figshare collection journal article supplement (https://tandf.figshare.com/articles/dataset/_/5633755)
Supplement: Supplementary file 2 [file 2 › tssp_a_1403842_sm9075.pdf]

Fig. S4

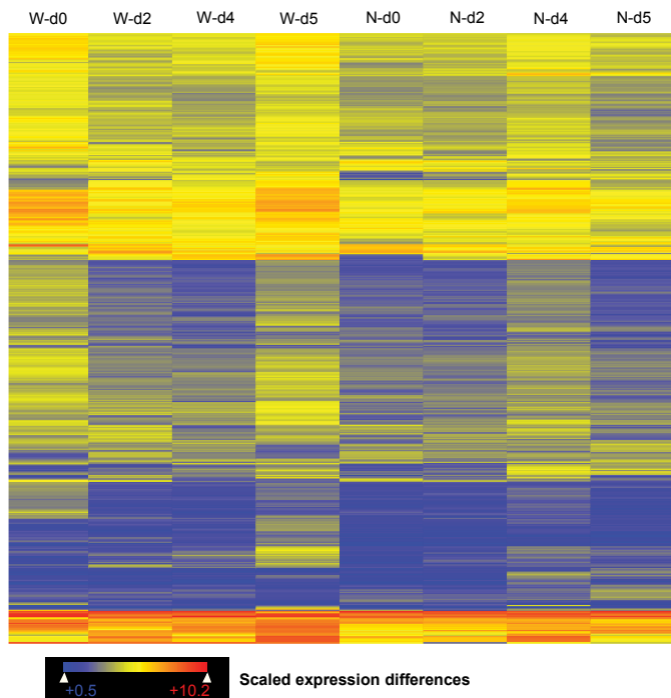

**Figure S4.** Hierarchical cluster analysis of 591 DEGs, based on the microarray data, at indicated times (d0, d2, d4, and d5) following rhizobium infection in Williams 82 (W) and NOD1-3 (N). Average of three biological replicates is shown in each column. The color key is indicated at the bottom.
